# Supplementary material for: Iridium-catalyzed regioselective C–H sulfonamidation of 1,2,4-thiadiazoles with sulfonyl azides in water
Source: Royal Society of Chemistry journal article supplement (doi:10.1039/d1ra04450h), 2021-01-01

*Supporting Information*

**Iridium-catalyzed regioselective C–H sulfonamidation of 1,2,4-thiadiazoles with sulfonyl azides in water**

Xian-Ting Cao<sup>a,\*</sup>, Su-Ning Wei<sup>a</sup>, Hao-Tian Sun<sup>a</sup>, Meng Li<sup>a</sup>, Zuo-Ling Zheng<sup>a</sup>,  
Guannan Wang<sup>a,\*</sup>

<sup>a</sup>College of Medical Engineering & the Key Laboratory for Medical Functional Nanomaterials, Jining Medical University, Jining, 272067, China.  
E-mail address: cchem1234@163.com (X. T. Cao), chemwangguannan@gmail.com (Pro. G.N. Wang)

**Table of Contents**

|                                                                        |    |
|------------------------------------------------------------------------|----|
| 1. General Information.....                                            | 2  |
| 2. Experimental Section.....                                           | 2  |
| 3. Characterization data of the products.....                          | 3  |
| 4. <sup>1</sup> H and <sup>13</sup> C NMR spectra of the products..... | 26 |

## 1. General Information

All the reagents were obtained commercially and used without any prior purification.  $^1\text{H}$  NMR spectra were recorded on a BrukerAvanceII 500 spectrometer. All products were isolated by column chromatography on a silica gel (200–300 mesh) column using petroleum ether (60–90°C) and ethyl acetate. Chemical shifts were reported in parts per million (ppm,  $\delta$ ) downfield from tetramethylsilane. Proton coupling patterns are described as singlet (s), doublet (d), triplet (t), quartet (q), multiplet (m), doublet of doublets (dd).

## 2. Experimental Information

**Preparation of the materials starting materials (Thioamides) were prepared according to our previous work.** [1-2]

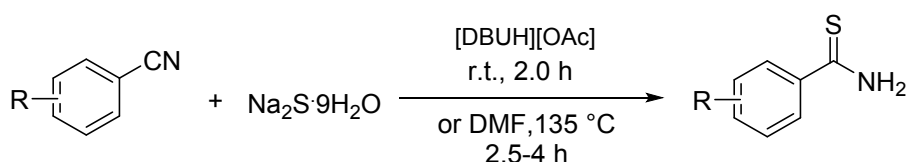

**Preparation of the materials starting materials (1,2,4-Thiadiazoles) were prepared according to literature procedures.** [3-4]

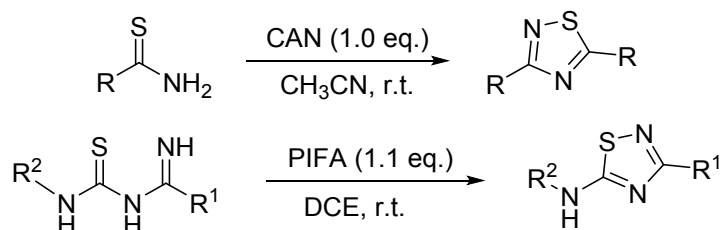

**Preparation of the materials starting materials (sulfonyl azides) were prepared according to literature procedures.** [5]

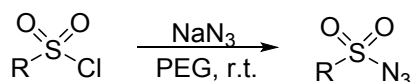

**General procedure for the synthesis of product 2aa-2bi and 4a-4m (compound 2aa as the example).**

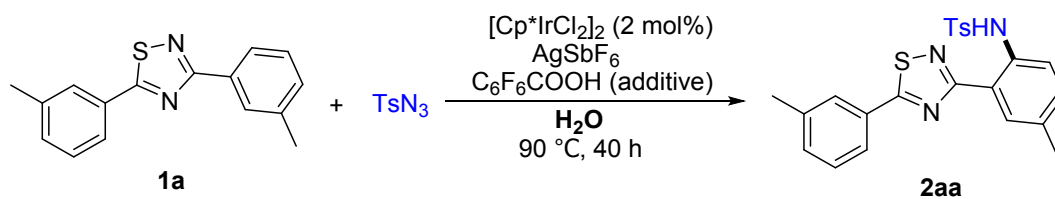

3,5-di-*m*-tolyl-1,2,4-thiadiazole (**1a**, 0.2 mmol), 4--methylbenzenesulfonyl azide (0.3 mmol), [Cp\*IrCl<sub>2</sub>]<sub>2</sub> (2.0 mol %), AgSbF<sub>6</sub> (8 mol %), C<sub>6</sub>F<sub>5</sub>COOH (40 mol %) were dissolved in H<sub>2</sub>O (1 mL) in a pressure tube. The mixture was stirred at 90 °C for 40 hours. After that, the solvent was removed under vacuum and the residue was purified by silica gel chromatography to afford product (**2aa**).

[1] X.-T. Cao, L. Qiao, H. Zheng, H.-Y. Yang, P.-F. Zhang, *RSC Adv.*, 2018, **8**, 170-175.

[2] X.-T. Cao, H.-Y. Yang, H. Zheng, P.-F. Zhang, *Heterocycles*, 2018, **96**, 509-517.

[3] G. Vanajatha, V. P. Reddy, *Tetrahedron Lett.*, 2016, **57**, 2356-2359.

[4] A. Mariappan, K. Rajaguru, N. M. Chola, S. Muthusubramanian, N. Bhuvanesh. *J. Org. Chem.*, 2016, **81**, 6573-6579.

[5] H. Zeng, H. Shao, *Green Chem. Lett. Rev.*, 2013, **6**, 222-227.

### 3. Characterization data of the products.

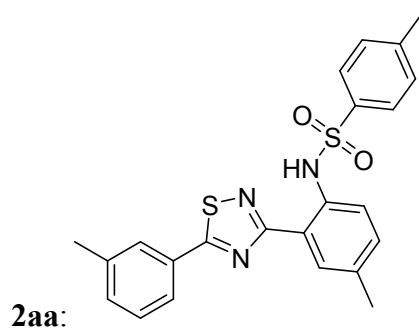

White solid, <sup>1</sup>H NMR (400 MHz, CDCl<sub>3</sub>) δ 10.98 (s, 1H), 8.07 (s, 1H), 7.78-7.72 (m, 2H), 7.58 (d, *J* = 8.4 Hz, 1H), 7.46 (d, *J* = 8.2 Hz, 2H), 7.40-7.30 (m, 2H), 7.14 (d, *J* = 8.3 Hz, 1H), 6.96 (d, *J* = 8.1 Hz, 2H), 2.41 (s, 3H), 2.28 (s, 3H), 2.16 ppm (s, 3H). <sup>13</sup>C NMR (101 MHz, CDCl<sub>3</sub>) δ 187.68, 171.97, 143.37, 139.56, 136.29, 134.47, 133.96, 133.45, 132.36, 130.93, 129.71, 129.49, 129.27, 128.04, 127.06, 124.71, 121.63, 121.34, 21.39, 21.36, 20.77 ppm. HRMS (ESI): Calculated for C<sub>23</sub>H<sub>21</sub>N<sub>3</sub>O<sub>2</sub>S<sub>2</sub>: [M+H]<sup>+</sup> 436.1148, Found 436.1128.

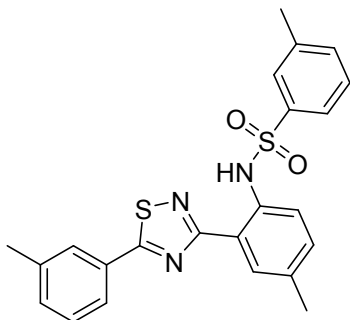

**2ab:**

White solid,  $^1\text{H}$  NMR (500 MHz,  $\text{CDCl}_3$ )  $\delta$  11.02 (s, 1H), 8.13 (s, 1H), 7.83-7.57 (m, 3H), 7.49-7.32 (m, 4H), 7.23-7.02 (m, 3H), 2.47 (s, 3H), 2.34 (s, 3H), 2.16 ppm (s, 3H).  $^{13}\text{C}$  NMR (126 MHz,  $\text{CDCl}_3$ )  $\delta$  187.65, 171.89, 139.56, 139.04, 138.86, 134.39, 134.08, 133.50, 132.37, 130.93, 129.63, 129.50, 128.49, 128.01, 127.36, 124.70, 124.19, 121.79, 121.44, 21.38, 21.18, 20.79 ppm. HRMS (ESI): Calculated for  $\text{C}_{23}\text{H}_{21}\text{N}_3\text{O}_2\text{S}_2$ :  $[\text{M}+\text{H}]^+$  436.1148, Found 436.1128.

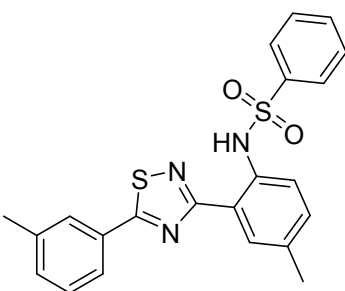

**2ac:**

White solid,  $^1\text{H}$  NMR (500 MHz,  $\text{CDCl}_3$ )  $\delta$  11.13 (s, 1H), 8.14 (s, 1H), 7.85-7.77 (m, 2H), 7.65 (d,  $J = 8.5$  Hz, 3H), 7.45-7.33 (m, 3H), 7.27-7.33 (m, 2H), 7.21 (dd,  $J = 8.4$ , 1.8 Hz, 1H), 2.47 (s, 3H), 2.34 ppm (s, 3H).  $^{13}\text{C}$  NMR (126 MHz,  $\text{CDCl}_3$ )  $\delta$  187.68, 171.86, 139.57, 139.17, 134.32, 134.12, 133.50, 132.63, 132.40, 130.97, 129.63, 129.50, 128.65, 128.04, 127.02, 124.71, 121.63, 121.32, 21.38, 20.79 ppm. HRMS (ESI): Calculated for  $\text{C}_{22}\text{H}_{19}\text{N}_3\text{O}_2\text{S}_2$ :  $[\text{M}+\text{H}]^+$  422.0992, Found 422.0969.

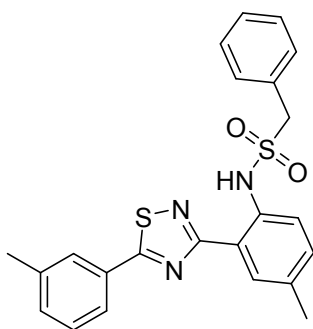

**2ad:**

White solid,  $^1\text{H}$  NMR (500 MHz,  $\text{CDCl}_3$ )  $\delta$  11.01 (s, 1H), 8.24 (s, 1H), 7.76 (d,  $J = 8.4$  Hz, 1H), 7.55-7.48 (m, 2H), 7.32-7.27 (m, 2H), 7.22 (d,  $J = 8.3$  Hz, 1H), 6.92 (d,  $J = 7.7$  Hz, 2H), 6.87 (d,  $J = 6.6$  Hz, 1H), 6.84-6.79 (m, 2H), 4.22 (s, 2H), 2.37 (s, 3H), 2.35 ppm (s, 3H).  $^{13}\text{C}$  NMR (126 MHz,  $\text{CDCl}_3$ )  $\delta$  187.34, 171.38, 139.34, 135.04, 133.46, 133.32, 132.80, 131.10, 130.47, 129.43, 129.30, 128.42, 128.27, 128.12, 128.06, 124.71, 119.95, 119.08, 56.97, 21.34, 20.80 ppm. HRMS (ESI): Calculated for  $\text{C}_{23}\text{H}_{21}\text{N}_3\text{O}_2\text{S}_2$ :  $[\text{M}+\text{H}]^+$  436.1148, Found 436.1125.

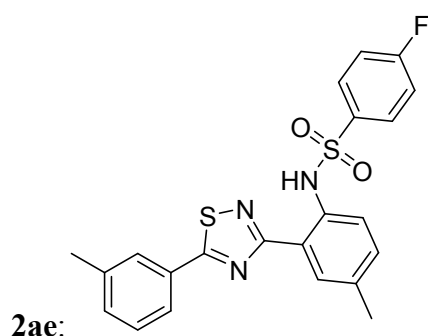

White solid,  $^1\text{H}$  NMR (500 MHz,  $\text{CDCl}_3$ )  $\delta$  11.10 (s, 1H), 8.15 (s, 1H), 7.86-7.76 (m, 2H), 7.70-7.57 (m, 3H), 7.48-7.35 (m, 2H), 7.23 (d,  $J = 8.2$  Hz, 1H), 6.91 (t,  $J = 8.5$  Hz, 2H), 2.47 (s, 3H), 2.36 ppm (s, 3H).  $^{13}\text{C}$  NMR (126 MHz,  $\text{CDCl}_3$ )  $\delta$  187.80, 171.80, 164.94 (d,  $J = 254.9$  Hz), 139.60, 135.17 (d,  $J = 3.1$  Hz), 134.41, 134.08, 133.56, 132.45, 131.08, 129.75 (d,  $J = 9.4$  Hz), 129.56, 129.52, 128.03, 124.69, 121.76, 121.45, 115.88 (d,  $J = 22.6$  Hz), 21.36, 20.79 ppm. HRMS (ESI): Calculated for  $\text{C}_{22}\text{H}_{18}\text{FN}_3\text{O}_2\text{S}_2$ :  $[\text{M}+\text{H}]^+$  440.0897, Found 440.0877.

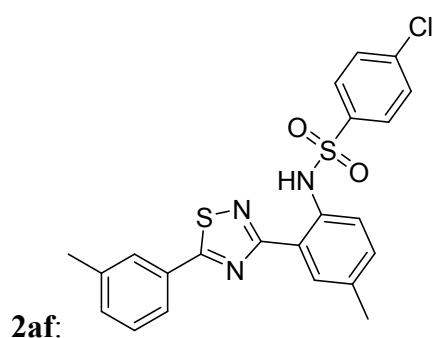

White solid,  $^1\text{H}$  NMR (500 MHz,  $\text{CDCl}_3$ )  $\delta$  11.02 (s, 1H), 8.07 (s, 1H), 7.78-7.68 (d,  $J = 9.2$  Hz, 2H), 7.56 (d,  $J = 8.3$  Hz, 1H), 7.52-7.43 (m, 2H), 7.38-7.28 (m, 2H), 7.16-7.04 (m, 3H), 2.39 (s, 3H), 2.28 ppm (s, 3H).  $^{13}\text{C}$  NMR (126 MHz,  $\text{CDCl}_3$ )  $\delta$  187.83, 171.79, 139.60, 139.13, 137.64, 134.50, 133.96, 133.57, 132.47, 131.12, 129.57,

129.52, 128.94, 128.47, 128.05, 124.72, 121.78, 121.50, 21.38, 20.81 ppm. HRMS (ESI): Calculated for  $C_{22}H_{18}ClN_3O_2S_2$ :  $[M+H]^+$  456.0602, Found 456.0576.

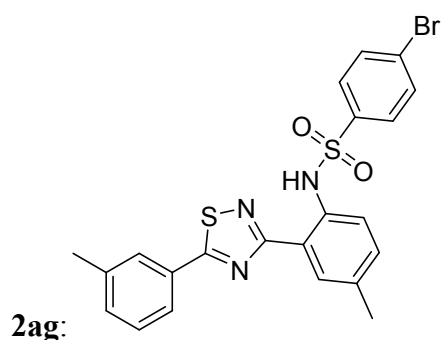

White solid,  $^1H$  NMR (500 MHz,  $CDCl_3$ )  $\delta$  11.09 (s, 1H), 8.17 (s, 1H), 7.82 (d,  $J$  = 8.9 Hz, 2H), 7.65 (d,  $J$  = 8.3 Hz, 1H), 7.51-7.47 (m, 2H), 7.46 (t,  $J$  = 7.6 Hz, 1H), 7.43-7.36 (m, 3H), 7.25-7.22 (m, 1H), 2.49 (s, 3H), 2.38 ppm (s, 3H).  $^{13}C$  NMR (126 MHz,  $CDCl_3$ )  $\delta$  187.87, 171.81, 139.61, 138.15, 134.56, 133.92, 133.56, 132.49, 131.92, 131.12, 129.60, 129.53, 128.54, 128.08, 127.67, 124.73, 121.89, 121.58, 21.38, 20.81 ppm. HRMS (ESI): Calculated for  $C_{22}H_{18}BrN_3O_2S_2$ :  $[M+H]^+$  500.0097, Found 500.0092.

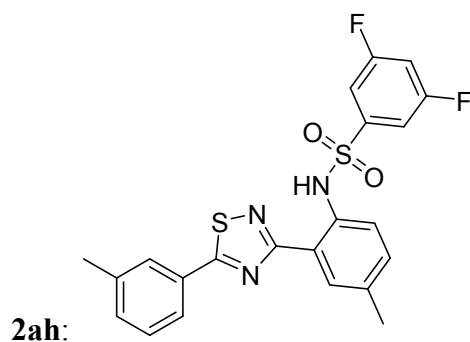

White solid,  $^1H$  NMR (500 MHz,  $CDCl_3$ )  $\delta$  11.19 (s, 1H), 8.17 (s, 1H), 7.91-7.76 (m, 2H), 7.63 (t,  $J$  = 9.0 Hz, 1H), 7.48-7.36 (m, 2H), 7.28-7.13 (m, 3H), 6.79 (d,  $J$  = 8.0 Hz, 1H), 2.47 (s, 3H), 2.36 ppm (s, 3H).  $^{13}C$  NMR (126 MHz,  $CDCl_3$ )  $\delta$  188.03, 171.71, 162.45 (d,  $J$  = 256.0 Hz), 162.36 (d,  $J$  = 256.4 Hz), 161.43, 161.34, 142.42, 139.62, 134.87, 133.63, 133.50, 132.59, 131.22, 129.53, 128.06, 124.73, 121.67, 121.55, 110.68 (d,  $J$  = 28.4 Hz), 108.31 (t,  $J$  = 25.0 Hz), 21.37, 20.82 ppm. HRMS (ESI): Calculated for  $C_{22}H_{17}F_2N_3O_2S_2$ :  $[M+H]^+$  458.0803, Found 458.0782.  $^{13}C$  NMR (126 MHz,  $CDCl_3$ )  $\delta$  162.45 (d,  $J$  = 256.0 Hz), 162.36 (d,  $J$  = 256.4 Hz).

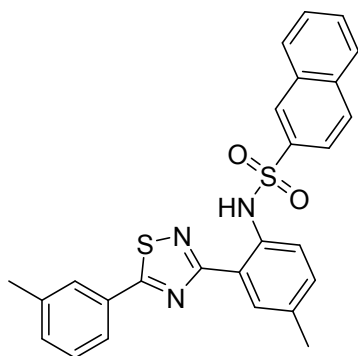

**2ai:**

White solid,  $^1\text{H}$  NMR (500 MHz,  $\text{CDCl}_3$ )  $\delta$  11.20 (s, 1H), 8.28 (s, 1H), 8.06 (s, 1H), 7.74-7.62 (m, 6H), 7.59-7.56 (m, 1H), 7.48-7.34 (m, 4H), 7.19 (d,  $J = 8.4$ , 1H), 2.44 (s, 3H), 2.29 ppm (s, 3H).  $^{13}\text{C}$  NMR (126 MHz,  $\text{CDCl}_3$ )  $\delta$  187.63, 171.82, 139.46, 136.20, 134.70, 134.29, 134.10, 133.45, 132.40, 131.86, 130.99, 129.57, 129.42, 129.12, 128.97, 128.65, 128.03, 127.77, 127.28, 124.70, 122.11, 121.58, 121.35, 21.37, 20.76 ppm. HRMS (ESI): Calculated for  $\text{C}_{26}\text{H}_{21}\text{N}_3\text{O}_2\text{S}_2$ :  $[\text{M}+\text{H}]^+$  472.1148, Found 472.1123.

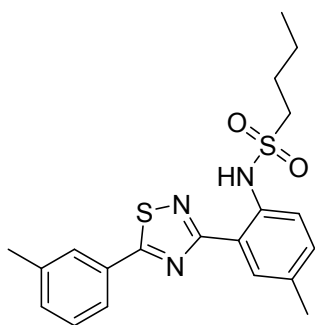

**2aj:**

White solid,  $^1\text{H}$  NMR (500 MHz,  $\text{CDCl}_3$ )  $\delta$  11.05 (s, 1H), 8.36 (d,  $J = 1.4$  Hz, 1H), 7.87-7.80 (m, 2H), 7.71 (d,  $J = 8.4$  Hz, 1H), 7.44-7.36 (m, 2H), 7.29-7.26 (m, 1H), 3.14-3.05 (m, 2H), 2.47 (s, 3H), 2.41 (s, 3H), 1.73-1.66 (m, 2H), 1.36-1.27 (m, 2H), 0.77 ppm (t,  $J = 7.4$  Hz, 3H).  $^{13}\text{C}$  NMR (126 MHz,  $\text{CDCl}_3$ )  $\delta$  187.81, 172.12, 139.52, 135.13, 133.50, 133.20, 132.73, 131.47, 129.65, 129.45, 128.09, 124.77, 119.74, 119.06, 51.22, 25.31, 21.36, 21.33, 20.74, 13.47 ppm. HRMS (ESI): Calculated for  $\text{C}_{20}\text{H}_{23}\text{N}_3\text{O}_2\text{S}_2$ :  $[\text{M}+\text{H}]^+$  402.1305, Found 402.1283.

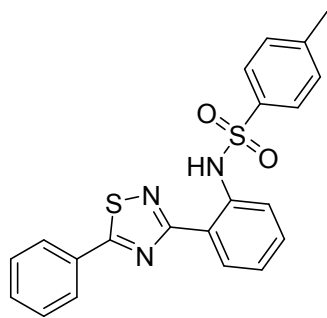

**2ak:**

White solid,  $^1\text{H}$  NMR (600 MHz,  $\text{CDCl}_3$ )  $\delta$  11.33 (s, 1H), 8.39 (dd,  $J = 7.9, 1.6$  Hz, 1H), 8.05-8.02 (m, 2H), 7.75 (dd,  $J = 8.3, 1.0$  Hz, 1H), 7.62-7.55 (m, 5H), 7.42-7.38 (m, 1H), 7.17 (t,  $J = 7.6$  Hz, 1H), 7.08 (d,  $J = 8.0$  Hz, 2H), 2.26 ppm (s, 3H).  $^{13}\text{C}$  NMR (151 MHz,  $\text{CDCl}_3$ )  $\delta$  187.51, 171.93, 143.58, 137.04, 136.32, 132.67, 131.61, 130.85, 129.76, 129.60, 129.39, 127.54, 127.11, 123.98, 120.91, 120.72, 21.44 ppm. HRMS (ESI): Calculated for  $\text{C}_{21}\text{H}_{17}\text{N}_3\text{O}_2\text{S}_2$ :  $[\text{M}+\text{H}]^+$  408.0835, Found 408.0821.

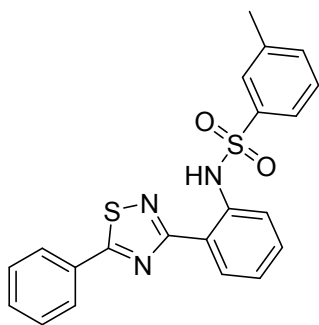

**2al:**

White solid,  $^1\text{H}$  NMR (500 MHz,  $\text{CDCl}_3$ )  $\delta$  11.30 (s, 1H), 8.37 (d,  $J = 7.8$  Hz, 1H), 8.02 (d,  $J = 6.4$  Hz, 2H), 7.78-7.32 (m, 7H), 7.23-7.06 (m, 3H), 2.20 ppm (s, 3H).  $^{13}\text{C}$  NMR (126 MHz,  $\text{CDCl}_3$ )  $\delta$  187.52, 171.88, 139.10, 138.99, 136.97, 133.58, 132.70, 131.61, 130.83, 129.72, 129.62, 128.59, 127.53, 127.41, 124.20, 124.14, 121.12, 121.03, 21.19 ppm. HRMS (ESI):  $\text{C}_{21}\text{H}_{17}\text{N}_3\text{O}_2\text{S}_2$ :  $[\text{M}+\text{H}]^+$  408.0835, Found 408.0821.

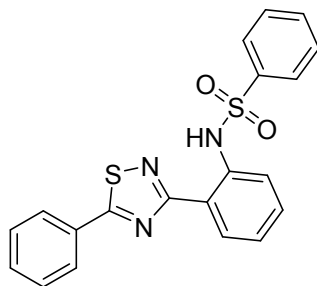

**2am:**

White solid,  $^1\text{H}$  NMR (500 MHz,  $\text{CDCl}_3$ )  $\delta$  11.39 (s, 1H), 8.38 (dd,  $J = 7.9, 1.6$  Hz, 1H), 8.12-7.91 (m, 2H), 7.81-7.64 (m, 3H), 7.62-7.50 (m, 3H), 7.46-7.36 (m, 2H),



7.29 (t,  $J = 7.8$  Hz, 2H), 7.17 ppm (t,  $J = 8.2$  Hz, 1H).  $^{13}\text{C}$  NMR (126 MHz,  $\text{CDCl}_3$ )  $\delta$  187.55, 171.86, 139.25, 136.91, 132.78, 132.70, 131.64, 130.89, 129.72, 129.62, 128.77, 127.55, 127.07, 124.13, 120.96, 120.79 ppm. HRMS (ESI): Calculated for  $\text{C}_{20}\text{H}_{15}\text{N}_3\text{O}_2\text{S}_2$ :  $[\text{M}+\text{H}]^+$  394.0679, Found 394.0666.

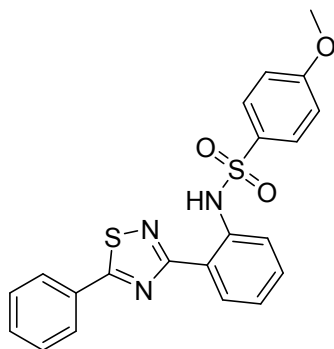

**2an:**

White solid,  $^1\text{H}$  NMR (500 MHz,  $\text{CDCl}_3$ )  $\delta$  11.29 (s, 1H), 8.39 (d,  $J = 7.9$  Hz, 1H), 8.02 (d,  $J = 6.6$  Hz, 2H), 7.74 (d,  $J = 8.3$  Hz, 1H), 7.68-7.62 (m, 2H), 7.60-7.53 (m, 3H), 7.40 (t,  $J = 8.5$  Hz, 1H), 7.16 (t,  $J = 8.1$  Hz, 1H), 6.74 (d,  $J = 9.0$  Hz, 2H), 3.70 ppm (s, 3H).  $^{13}\text{C}$  NMR (126 MHz,  $\text{CDCl}_3$ )  $\delta$  187.51, 171.96, 162.90, 137.13, 132.68, 131.60, 130.89, 130.88, 129.75, 129.61, 129.25, 127.55, 123.96, 120.94, 120.73, 113.95, 55.47 ppm. HRMS (ESI): Calculated for  $\text{C}_{21}\text{H}_{17}\text{N}_3\text{O}_3\text{S}_2$ :  $[\text{M}+\text{H}]^+$  424.0784, Found 424.0768.

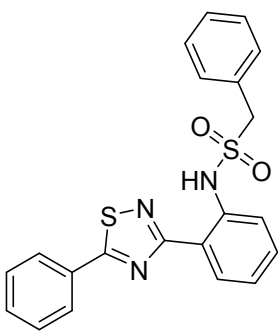

**2ao:**

White solid,  $^1\text{H}$  NMR (500 MHz,  $\text{CDCl}_3$ )  $\delta$  11.22 (s, 1H), 8.54 (d,  $J = 7.8$  Hz, 1H), 7.96 (d,  $J = 8.3$  Hz, 1H), 7.83 (d,  $J = 7.0$  Hz, 2H), 7.62-7.42 (m, 4H), 7.28 (s, 1H), 7.13-6.79 (m, 5H), 4.35 ppm (s, 2H).  $^{13}\text{C}$  NMR (126 MHz,  $\text{CDCl}_3$ )  $\delta$  187.24, 171.37, 137.51, 132.54, 132.05, 130.98, 130.48, 129.54, 129.45, 128.34, 128.18, 127.54, 123.77, 119.98, 118.84, 57.29 ppm. HRMS (ESI): Calculated for  $\text{C}_{21}\text{H}_{17}\text{N}_3\text{O}_2\text{S}_2$ :  $[\text{M}+\text{H}]^+$  408.0835, Found 408.0821.

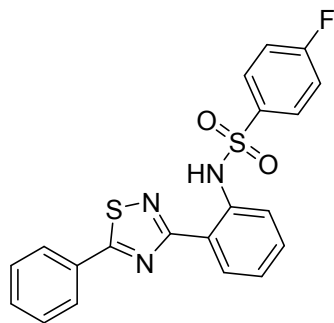

**2ap:**

White solid,  $^1\text{H}$  NMR (500 MHz,  $\text{CDCl}_3$ )  $\delta$  11.36 (s, 1H), 8.40 (d,  $J = 7.9$ , 1H), 8.02 (d,  $J = 6.7$  Hz, 2H), 7.80-7.68 (m, 3H), 7.62-7.53 (m, 3H), 7.42 (t,  $J = 8.5$  Hz, 1H), 7.19 (t,  $J = 7.6$  Hz, 1H), 6.95 ppm (t,  $J = 8.5$  Hz, 2H).  $^{13}\text{C}$  NMR (126 MHz,  $\text{CDCl}_3$ )  $\delta$  187.66, 171.80, 165.04 (d,  $J = 255.2$  Hz), 136.70, 135.27 (d,  $J = 3.2$  Hz), 132.77, 131.71, 131.00, 129.83 (d,  $J = 9.4$  Hz), 129.64, 127.55, 124.38, 121.09, 120.90, 116.02 ppm (d,  $J = 22.7$  Hz). HRMS (ESI): Calculated for  $\text{C}_{20}\text{H}_{14}\text{FN}_3\text{O}_2\text{S}_2$ :  $[\text{M}+\text{H}]^+$  412.0584, Found 412.0564.

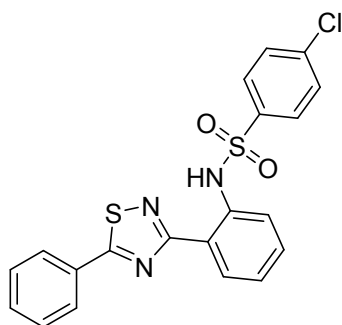

**2aq:**

White solid,  $^1\text{H}$  NMR (500 MHz,  $\text{CDCl}_3$ )  $\delta$  11.29 (s, 1H), 8.33 (d,  $J = 7.9$  Hz, 1H), 7.94 (d,  $J = 6.7$  Hz, 2H), 7.66 (d,  $J = 8.2$  Hz, 1H), 7.55 (t,  $J = 8.3$  Hz, 2H), 7.53-7.45 (m, 3H), 7.34 (t,  $J = 8.4$  Hz, 1H), 7.17 (d,  $J = 8.8$  Hz, 2H), 7.12 ppm (t,  $J = 7.2$  Hz, 1H).  $^{13}\text{C}$  NMR (126 MHz,  $\text{CDCl}_3$ )  $\delta$  187.68, 171.78, 139.30, 137.73, 136.58, 132.77, 131.72, 131.03, 129.64, 129.07, 128.52, 127.56, 124.46, 121.13, 120.92 ppm. HRMS (ESI): Calculated for  $\text{C}_{20}\text{H}_{14}\text{ClN}_3\text{O}_2\text{S}_2$ :  $[\text{M}+\text{H}]^+$  428.0289, Found 428.0265.

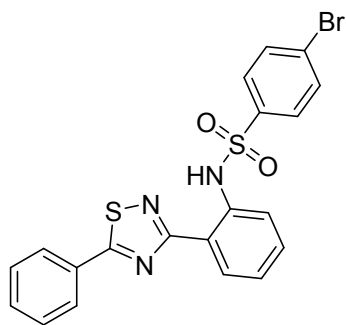

**2ar:**

White solid,  $^1\text{H}$  NMR (500 MHz,  $\text{CDCl}_3$ )  $\delta$  11.28 (s, 1H), 8.34 (d,  $J = 7.8$  Hz, 1H), 7.96 (d,  $J = 7.2$  Hz, 2H), 7.67 (d,  $J = 8.2$  Hz, 1H), 7.56-7.44 (m, 5H), 7.38-7.29 (m, 3H), 7.16-7.11 ppm (m, 1H).  $^{13}\text{C}$  NMR (126 MHz,  $\text{CDCl}_3$ )  $\delta$  187.69, 171.79, 138.26, 136.55, 132.77, 132.05, 131.73, 131.03, 129.64, 128.58, 127.83, 127.57, 124.49, 121.17, 120.97 ppm. HRMS (ESI): Calculated for  $\text{C}_{20}\text{H}_{14}\text{BrN}_3\text{O}_2\text{S}_2$ :  $[\text{M}+\text{H}]^+$  471.9784, Found 471.9776.

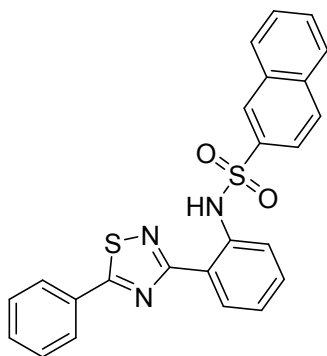

**2as:**

White solid,  $^1\text{H}$  NMR (500 MHz,  $\text{CDCl}_3$ )  $\delta$  11.44 (s, 1H), 8.38-8.27 (m, 2H), 7.99-7.91 (m, 2H), 7.80 (d,  $J = 8.2$  Hz, 1H), 7.76 (d,  $J = 8.0$  Hz, 1H), 7.73-7.67 (m, 2H), 7.66-7.63 (m, 1H), 7.59-7.44 (m, 5H), 7.38 (t,  $J = 7.8$  Hz, 1H), 7.13 ppm (t,  $J = 7.6$  Hz, 1H).  $^{13}\text{C}$  NMR (126 MHz,  $\text{CDCl}_3$ )  $\delta$  187.50, 171.82, 136.88, 136.22, 134.77, 132.67, 131.89, 131.65, 130.90, 129.67, 129.56, 129.15, 129.13, 128.76, 128.75, 127.80, 127.54, 127.39, 124.15, 122.09, 121.03, 120.81 ppm. HRMS (ESI): Calculated for  $\text{C}_{24}\text{H}_{17}\text{N}_3\text{O}_2\text{S}_2$ :  $[\text{M}+\text{H}]^+$  444.0835, Found 444.0809.

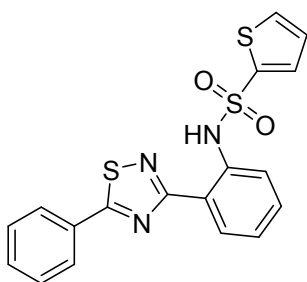

**2at:**

White solid,  $^1\text{H}$  NMR (500 MHz,  $\text{CDCl}_3$ )  $\delta$  11.52 (s, 1H), 8.42 (d,  $J = 7.9$  Hz, 1H), 8.03 (d,  $J = 7.9$  Hz, 2H), 7.84 (d,  $J = 8.3$  Hz, 1H), 7.67-7.52 (m, 3H), 7.50-7.30 (m, 3H), 7.22 (t,  $J = 7.6$  Hz, 1H), 6.85 ppm (t,  $J = 3.6$  Hz, 1H).  $^{13}\text{C}$  NMR (126 MHz,  $\text{CDCl}_3$ )  $\delta$  187.68, 171.76, 139.94, 136.66, 132.72, 132.51, 132.19, 131.69, 130.86, 129.69, 129.62, 127.58, 127.06, 124.54, 121.29, 121.17 ppm. HRMS (ESI): Calculated for  $\text{C}_{18}\text{H}_{13}\text{N}_3\text{O}_2\text{S}_3$ :  $[\text{M}+\text{H}]^+$  400.0243, Found 400.0220.

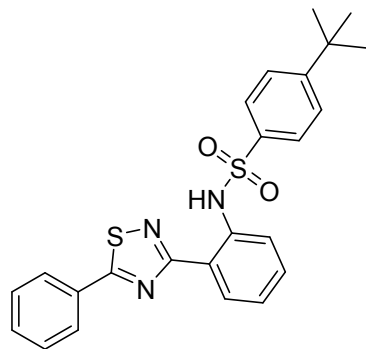

**2au:**

White solid,  $^1\text{H}$  NMR (500 MHz,  $\text{CDCl}_3$ )  $\delta$  11.26 (s, 1H), 8.32 (d,  $J = 7.9$ , 1H), 7.95 (d,  $J = 7.9$ , 2H), 7.69 (d,  $J = 8.0$  Hz, 1H), 7.57-7.55 (m, 2H), 7.52-7.46 (m, 3H), 7.34 (t,  $J = 8.6$  Hz, 1H), 7.23-7.19 (m, 2H), 7.10 (t,  $J = 7.2$  Hz, 1H), 1.12 ppm (s, 9H).  $^{13}\text{C}$  NMR (126 MHz,  $\text{CDCl}_3$ )  $\delta$  187.45, 171.94, 156.49, 137.09, 136.32, 132.67, 131.63, 130.84, 129.76, 129.60, 127.54, 126.89, 125.74, 123.96, 120.97, 120.84, 35.02, 30.94 ppm. HRMS (ESI): Calculated for  $\text{C}_{24}\text{H}_{23}\text{N}_3\text{O}_2\text{S}_3$ :  $[\text{M}+\text{H}]^+$  450.1305, Found 450.1284.

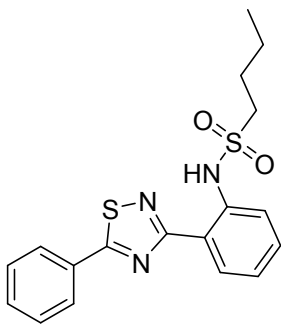

**2av:**

White solid,  $^1\text{H}$  NMR (500 MHz,  $\text{CDCl}_3$ )  $\delta$  11.15 (s, 1H), 8.50 (d,  $J = 7.9$  Hz, 1H), 7.95 (d,  $J = 6.8$  Hz, 2H), 7.74 (d,  $J = 8.3$  Hz, 1H), 7.54-7.44 (m, 3H), 7.39 (t,  $J = 7.3$  Hz, 1H), 7.14 (t,  $J = 7.6$  Hz, 1H), 3.12-2.98 (m, 2H), 1.68-1.61 (m, 2H), 1.30-1.21 (m, 2H), 0.71 ppm (t,  $J = 7.3$  Hz, 3H).  $^{13}\text{C}$  NMR (126 MHz,  $\text{CDCl}_3$ )  $\delta$  187.65, 172.10, 137.63, 132.70, 132.00, 131.41, 129.74, 129.58, 127.59, 123.41, 119.60, 118.52, 51.51, 25.33, 21.32, 13.46 ppm. HRMS (ESI): Calculated for  $\text{C}_{18}\text{H}_{19}\text{N}_3\text{O}_2\text{S}_3$ :  $[\text{M}+\text{H}]^+$

374.0992, Found 374.0975.

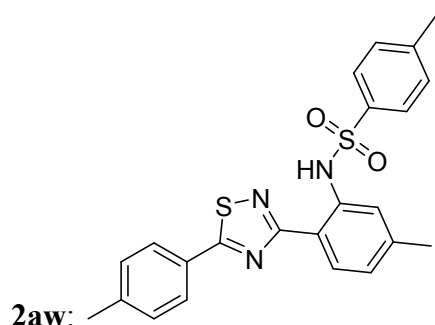

White solid,  $^1\text{H}$  NMR (500 MHz,  $\text{CDCl}_3$ )  $\delta$  11.25 (s, 1H), 8.16 (d,  $J = 8.0$  Hz, 1H), 7.82 (d,  $J = 8.1$  Hz, 2H), 7.54-7.47 (m, 3H), 7.27 (d,  $J = 8.0$  Hz, 2H), 6.99 (d,  $J = 8.1$  Hz, 2H), 6.88 (d,  $J = 8.0$  Hz, 1H), 2.37 (s, 3H), 2.29 (s, 3H), 2.18 ppm (s, 3H).  $^{13}\text{C}$  NMR (126 MHz,  $\text{CDCl}_3$ )  $\delta$  187.33, 171.87, 143.47, 143.39, 142.19, 136.88, 136.38, 130.61, 130.23, 129.33, 127.46, 127.19, 127.09, 125.02, 121.23, 118.57, 21.75, 21.73, 21.44 ppm. HRMS (ESI): Calculated for  $\text{C}_{23}\text{H}_{21}\text{N}_3\text{O}_2\text{S}_2$ :  $[\text{M}+\text{H}]^+$  436.1148, Found 436.1126.

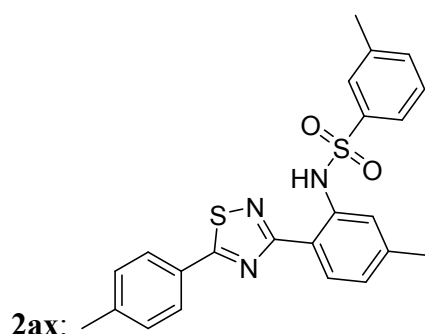

White solid,  $^1\text{H}$  NMR (500 MHz,  $\text{CDCl}_3$ )  $\delta$  11.29 (s, 1H), 8.23 (d,  $J = 8.1$  Hz, 1H), 7.90 (d,  $J = 8.1$  Hz, 2H), 7.54 (d,  $J = 19.3$  Hz, 2H), 7.47 (d,  $J = 7.4$  Hz, 1H), 7.35 (d,  $J = 8.0$  Hz, 2H), 7.19-7.12 (m, 2H), 6.97 (d,  $J = 8.0$  Hz, 1H), 2.45 (s, 3H), 2.38 (s, 3H), 2.19 ppm (s, 3H).  $^{13}\text{C}$  NMR (126 MHz,  $\text{CDCl}_3$ )  $\delta$  187.33, 171.82, 143.41, 142.18, 139.12, 138.89, 136.79, 133.48, 130.58, 130.24, 128.51, 127.45, 127.41, 127.16, 125.18, 124.20, 121.59, 118.81, 21.73, 21.18 ppm. HRMS (ESI): Calculated for  $\text{C}_{23}\text{H}_{21}\text{N}_3\text{O}_2\text{S}_2$ :  $[\text{M}+\text{H}]^+$  436.1148, Found 436.1128.

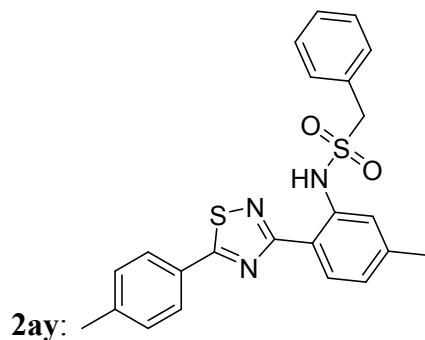

White solid,  $^1\text{H}$  NMR (500 MHz,  $\text{CDCl}_3$ )  $\delta$  11.17 (s, 1H), 8.32 (d,  $J = 8.1$  Hz, 1H), 7.67-7.58 (m, 3H), 7.22 (d,  $J = 7.9$  Hz, 2H), 7.00-6.92 (m, 3H), 6.92-6.82 (m, 3H), 4.26 (s, 2H), 2.36 ppm (d,  $J = 2.6$  Hz, 6H).  $^{13}\text{C}$  NMR (126 MHz,  $\text{CDCl}_3$ )  $\delta$  187.05, 171.33, 143.22, 142.71, 137.38, 130.77, 130.53, 130.06, 128.37, 128.31, 128.15, 127.47, 126.98, 124.76, 119.16, 117.59, 57.26, 21.87, 21.72 ppm. HRMS (ESI): Calculated for  $\text{C}_{23}\text{H}_{21}\text{N}_3\text{O}_2\text{S}_2$ :  $[\text{M}+\text{H}]^+$  436.1148, Found 436.1125.

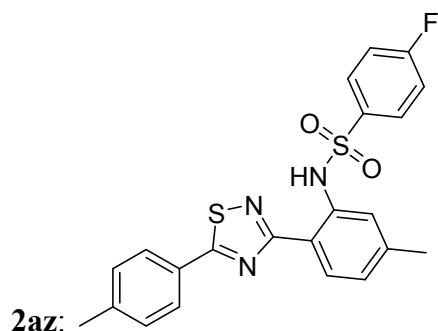

White solid,  $^1\text{H}$  NMR (500 MHz,  $\text{CDCl}_3$ )  $\delta$  11.35 (s, 1H), 8.25 (d,  $J = 8.1$  Hz, 1H), 7.89 (d,  $J = 8.1$  Hz, 2H), 7.78-7.63 (m, 2H), 7.56 (d,  $J = 7.2$  Hz, 1H), 7.34 (d,  $J = 7.9$  Hz, 2H), 7.07-6.84 (m, 3H), 2.44 (s, 3H), 2.38 ppm (s, 3H).  $^{13}\text{C}$  NMR (126 MHz,  $\text{CDCl}_3$ )  $\delta$  187.47, 171.72, 164.99 (d,  $J = 254.9$  Hz), 143.52, 142.33, 136.52, 135.32, 130.74, 130.26, 129.78 (d,  $J = 9.4$  Hz), 127.46, 127.08, 125.42, 121.47, 118.77, 115.94 (d,  $J = 22.6$  Hz), 21.74 ppm. HRMS (ESI): Calculated for  $\text{C}_{22}\text{H}_{18}\text{N}_3\text{FO}_2\text{S}_2$ :  $[\text{M}+\text{H}]^+$  440.0897, Found 440.0874.

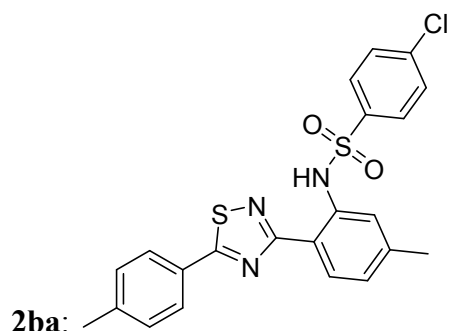

White solid,  $^1\text{H}$  NMR (500 MHz,  $\text{CDCl}_3$ )  $\delta$  11.29 (s, 1H), 8.18 (d,  $J = 8.1$  Hz, 1H), 7.82 (d,  $J = 8.1$  Hz, 2H), 7.61-7.40 (m, 3H), 7.27 (d,  $J = 8.0$  Hz, 2H), 7.19-7.14 (m, 2H), 6.93 (d,  $J = 8.1$  Hz, 1H), 2.37 (s, 3H), 2.31 ppm (s, 3H).  $^{13}\text{C}$  NMR (126 MHz,  $\text{CDCl}_3$ )  $\delta$  187.51, 171.71, 143.52, 142.36, 139.19, 137.77, 136.41, 130.76, 130.26, 129.00, 128.49, 127.47, 127.09, 125.50, 121.47, 118.80, 21.75, 21.74 ppm. HRMS (ESI): Calculated for  $\text{C}_{22}\text{H}_{18}\text{N}_3\text{ClO}_2\text{S}_2$ :  $[\text{M}+\text{H}]^+$  456.0602, Found 456.0573.

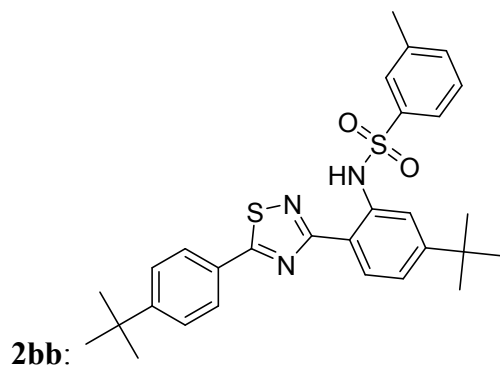

White solid,  $^1\text{H}$  NMR (500 MHz,  $\text{CDCl}_3$ )  $\delta$  11.31 (s, 1H), 8.19 (d,  $J = 8.3$  Hz, 1H), 7.92-7.86 (m, 2H), 7.67 (d,  $J = 1.8$  Hz, 1H), 7.53-7.48 (m, 3H), 7.44 (d,  $J = 7.3$  Hz, 1H), 7.12-7.03 (m, 3H), 2.13 (s, 3H), 1.30 (s, 9H), 1.25 ppm (s, 9H).  $^{13}\text{C}$  NMR (126 MHz,  $\text{CDCl}_3$ )  $\delta$  187.33, 171.74, 156.47, 155.20, 139.05, 138.78, 136.71, 133.50, 130.32, 128.53, 127.83, 127.38, 127.13, 126.57, 124.39, 121.07, 118.36, 117.75, 35.25, 35.12, 31.11, 31.01, 21.14 ppm. HRMS (ESI): Calculated for  $\text{C}_{29}\text{H}_{33}\text{N}_3\text{O}_2\text{S}_2$ :  $[\text{M}+\text{H}]^+$  520.2087, Found 520.2070.

138.78, 136.71, 133.50, 130.32, 128.53, 127.83, 127.38, 127.13, 126.57, 124.39, 136.62, 134.85, 132.73, 130.37, 129.73, 128.67, 127.48, 127.39, 127.29, 127.12, 126.58,

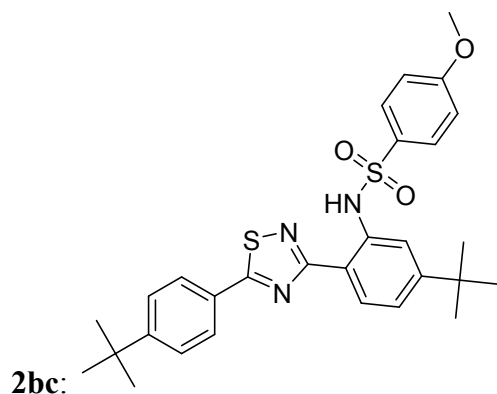

White solid,  $^1\text{H}$  NMR (500 MHz,  $\text{CDCl}_3$ )  $\delta$  11.35 (s, 1H), 8.27 (d,  $J = 8.3$  Hz, 1H), 8.09-7.92 (m, 2H), 7.76 (d,  $J = 1.8$  Hz, 1H), 7.69-7.64 (m, 2H), 7.58 (d,  $J = 8.5$  Hz, 2H), 7.16 (dd,  $J = 8.4, 1.9$  Hz, 1H), 6.77-6.69 (m, 2H), 3.71 (s, 3H), 1.38 (s, 9H), 1.33 ppm (s, 9H).  $^{13}\text{C}$  NMR (126 MHz,  $\text{CDCl}_3$ )  $\delta$  187.32, 171.78, 162.84, 156.44, 155.19, 136.81, 130.88, 130.32, 129.42, 127.37, 127.14, 126.55, 120.98, 118.29, 117.69, 113.81, 55.45, 35.23, 35.10, 31.10, 31.01 ppm. HRMS (ESI): Calculated for  $\text{C}_{29}\text{H}_{33}\text{N}_3\text{O}_3\text{S}_2$ :  $[\text{M}+\text{H}]^+$  536.2036, Found 536.2015.

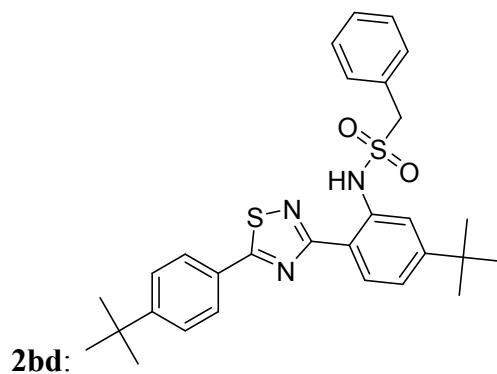

White solid,  $^1\text{H}$  NMR (500 MHz,  $\text{CDCl}_3$ )  $\delta$  11.21 (s, 1H), 8.43 (d,  $J = 8.4$  Hz, 1H), 7.99 (s, 1H), 7.76 (d,  $J = 6.9$  Hz, 2H), 7.52 (d,  $J = 7.0$  Hz, 2H), 7.28 (d,  $J = 8.4$  Hz, 1H), 7.05-6.88 (m, 5H), 4.32 (s, 2H), 1.39 ppm (d,  $J = 9.0$  Hz, 18H).  $^{13}\text{C}$  NMR (126 MHz,  $\text{CDCl}_3$ )  $\delta$  187.03, 171.32, 156.30, 155.87, 137.29, 130.49, 128.34, 128.31, 128.17, 127.38, 126.95, 126.38, 121.03, 117.65, 116.06, 57.30, 35.26, 35.22, 31.14, 31.33 ppm. HRMS (ESI): Calculated for  $\text{C}_{29}\text{H}_{33}\text{N}_3\text{O}_2\text{S}_2$ :  $[\text{M}+\text{H}]^+$  520.2087, Found 520.2070.



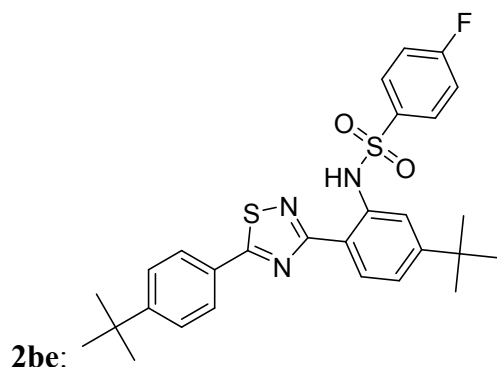

White solid,  $^1\text{H}$  NMR (500 MHz,  $\text{CDCl}_3$ )  $\delta$  11.42 (s, 1H), 8.29 (d,  $J = 8.3$  Hz, 1H), 7.96 (d,  $J = 8.4$  Hz, 2H), 7.77-7.68 (m, 3H), 7.58 (d,  $J = 8.4$  Hz, 2H), 7.19 (dd,  $J = 8.4$ , 1.7 Hz, 1H), 6.95 (t,  $J = 8.6$  Hz, 2H), 1.38 (s, 9H), 1.33 ppm (s, 9H).  $^{13}\text{C}$  NMR (126 MHz,  $\text{CDCl}_3$ )  $\delta$  187.49, 171.63, 165.01 (d,  $J = 255.0$  Hz), 155.98 (d,  $J = 151.2$  Hz), 136.40, 135.27, 135.24, 130.47, 129.98 (d,  $J = 9.4$  Hz), 127.38, 127.05, 126.61, 121.42, 118.50, 117.91, 115.90 (d,  $J = 22.6$  Hz), 35.26, 35.14, 31.11, 31.01 ppm. HRMS (ESI): Calculated for  $\text{C}_{28}\text{H}_{30}\text{FN}_3\text{O}_2\text{S}_2$ :  $[\text{M}+\text{H}]^+$  524.1836, Found 524.1839.

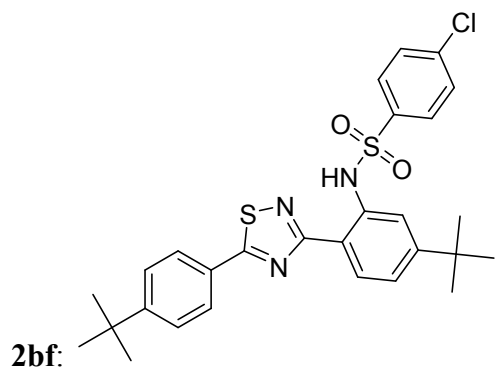

White solid,  $^1\text{H}$  NMR (500 MHz,  $\text{CDCl}_3$ )  $\delta$  11.43 (s, 1H), 8.29 (d,  $J = 8.3$  Hz, 1H), 7.96 (d,  $J = 8.4$  Hz, 2H), 7.76 (s, 1H), 7.64 (d,  $J = 8.6$  Hz, 2H), 7.58 (d,  $J = 8.4$  Hz, 2H), 7.27-7.24(m, 2H), 7.20 (dd,  $J = 8.4$ , 1.8 Hz, 1H), 1.38 (s, 9H), 1.33 ppm (s, 9H).  $^{13}\text{C}$  NMR (126 MHz,  $\text{CDCl}_3$ )  $\delta$  187.51, 171.60, 156.59, 155.41, 139.22, 137.73, 136.27, 130.50, 130.08, 128.95, 128.68, 127.38, 127.04, 126.61, 121.52, 118.53, 117.93, 35.26, 35.15, 31.11, 31.02 ppm. HRMS (ESI): Calculated for  $\text{C}_{28}\text{H}_{30}\text{ClN}_3\text{O}_2\text{S}_2$ :  $[\text{M}+\text{H}]^+$  540.1541, Found 540.1533.

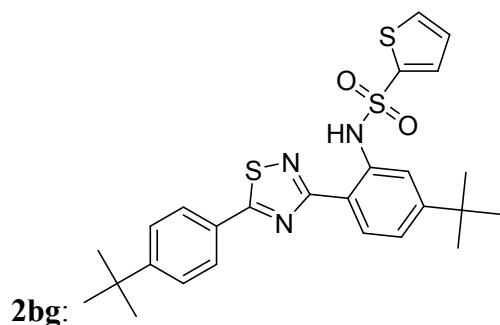

White solid,  $^1\text{H}$  NMR (500 MHz,  $\text{CDCl}_3$ )  $\delta$  11.50 (s, 1H), 8.24 (d,  $J = 8.3$  Hz, 1H), 7.89 (d,  $J = 8.4$  Hz, 2H), 7.79 (d,  $J = 1.4$  Hz, 1H), 7.50 (d,  $J = 8.4$  Hz, 2H), 7.33 (d,  $J = 3.7$  Hz, 1H), 7.29 (d,  $J = 4.9$  Hz, 1H), 7.15 (d,  $J = 8.4$  Hz, 1H), 6.81-6.75 (m, 1H), 1.30 (s, 9H), 1.28 ppm (s, 9H).  $^{13}\text{C}$  NMR (126 MHz,  $\text{CDCl}_3$ )  $\delta$  187.48, 171.60, 156.51, 155.39, 140.02, 136.40, 132.45, 132.11, 130.34, 127.41, 127.09, 126.97, 126.58, 121.56, 118.67, 118.13, 35.25, 35.19, 31.11, 31.05 ppm. HRMS (ESI): Calculated for  $\text{C}_{26}\text{H}_{29}\text{N}_3\text{O}_2\text{S}_2$ :  $[\text{M}+\text{H}]^+$  512.1495, Found 512.1470.

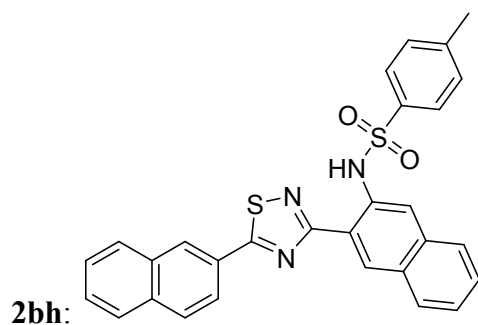

White solid,  $^1\text{H}$  NMR (500 MHz,  $\text{CDCl}_3$ )  $\delta$  11.31 (s, 1H), 8.93 (s, 1H), 8.57 (s, 1H), 8.15 (s, 1H), 8.06 (dd,  $J = 8.5, 1.1$  Hz, 1H), 8.01 (t,  $J = 8.1$  Hz, 2H), 7.92-7.85 (m, 2H), 7.81 (d,  $J = 8.2$  Hz, 1H), 7.65-7.58 (m, 4H), 7.52 (t,  $J = 7.5$  Hz, 1H), 7.43 (t,  $J = 7.4$  Hz, 1H), 7.01 (d,  $J = 8.2$  Hz, 2H), 2.19 ppm (s, 3H).  $^{13}\text{C}$  NMR (126 MHz,  $\text{CDCl}_3$ )  $\delta$  187.48, 172.08, 143.51, 136.24, 135.26, 134.61, 133.45, 133.03, 132.00, 129.88, 129.58, 129.35, 129.15, 128.62, 128.44, 128.16, 128.08, 128.04, 127.44, 127.14, 126.96, 125.75, 123.83, 121.12, 118.51, 21.38 ppm. HRMS (ESI): Calculated for  $\text{C}_{29}\text{H}_{21}\text{N}_3\text{O}_2\text{S}_2$ :  $[\text{M}+\text{H}]^+$  508.1148, Found 508.1123.

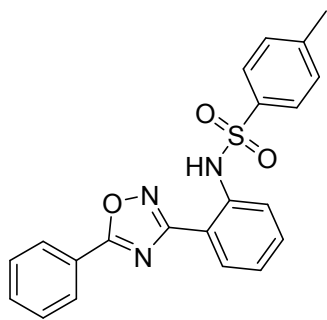

**2bi:**

White solid,  $^1\text{H}$  NMR (500 MHz,  $\text{CDCl}_3$ )  $\delta$  9.97 (s, 1H), 8.26-8.20 (m, 2H), 8.15 (dd,  $J = 7.9, 1.5$  Hz, 1H), 7.81 (d,  $J = 8.3$  Hz, 1H), 7.66 (m, 5H), 7.48 (t,  $J = 7.8$  Hz, 1H), 7.22 (t,  $J = 7.6$  Hz, 1H), 7.12 (d,  $J = 8.1$  Hz, 2H), 2.29 ppm (s, 3H).  $^{13}\text{C}$  NMR (126 MHz,  $\text{CDCl}_3$ )  $\delta$  174.96, 167.43, 143.85, 136.88, 136.13, 133.46, 132.31, 129.52, 129.48, 129.39, 128.32, 127.22, 124.34, 123.38, 121.22, 115.73, 21.46 ppm. HRMS (ESI): Calculated for  $\text{C}_{21}\text{H}_{17}\text{N}_3\text{O}_3\text{S}$ :  $[\text{M}+\text{H}]^+$  392.1064, Found 392.1053.

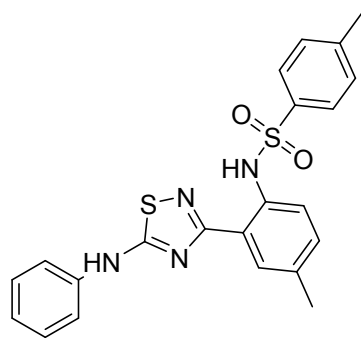

**4a:**

White solid,  $^1\text{H}$  NMR (500 MHz,  $\text{CDCl}_3$ )  $\delta$  11.32 (s, 1H), 8.91 (s, 1H), 7.94 (s, 1H), 7.62 (d,  $J = 8.3$  Hz, 2H), 7.58 (d,  $J = 8.4$  Hz, 1H), 7.41 (t,  $J = 7.9$  Hz, 2H), 7.26 (d,  $J = 7.8$  Hz, 2H), 7.17 (t,  $J = 7.4$  Hz, 1H), 7.12 (dd,  $J = 8.4, 1.9$  Hz, 1H), 7.07 (d,  $J = 8.3$  Hz, 2H), 2.25 (s, 3H), 2.23 ppm (s, 3H).  $^{13}\text{C}$  NMR (126 MHz,  $\text{CDCl}_3$ )  $\delta$  179.48, 167.61, 143.53, 138.84, 136.17, 134.29, 133.64, 131.97, 130.58, 129.88, 129.38, 127.12, 124.62, 120.96, 120.87, 118.51, 21.43, 20.65 ppm. HRMS (ESI): Calculated for  $\text{C}_{22}\text{H}_{20}\text{N}_4\text{O}_2\text{S}_2$ :  $[\text{M}+\text{H}]^+$  437.1101, Found 437.1083.

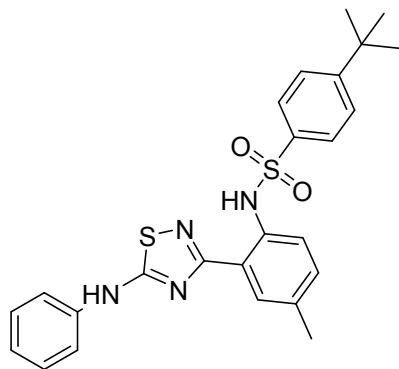

**4b:**

White solid,  $^1\text{H}$  NMR (500 MHz,  $\text{DMSO-}d_6$ )  $\delta$  11.23 (s, 1H), 11.21 (s, 1H), 7.95 (s, 1H), 7.56 (d,  $J = 8.5$  Hz, 4H), 7.52 (d,  $J = 8.4$  Hz, 1H), 7.47-7.40 (m, 4H), 7.25 (d,  $J = 8.4$  Hz, 1H), 7.14 (t,  $J = 7.4$  Hz, 1H), 2.28 (s, 3H), 1.14 ppm (s, 9H).  $^{13}\text{C}$  NMR (126 MHz,  $\text{DMSO-}d_6$ )  $\delta$  178.71, 167.61, 156.63, 139.84, 136.29, 134.29, 133.82, 132.36, 131.01, 130.01, 126.95, 126.42, 123.99, 121.39, 121.04, 118.58, 35.21, 31.02, 20.80 ppm. HRMS (ESI): Calculated for  $\text{C}_{25}\text{H}_{26}\text{N}_4\text{O}_2\text{S}_2$ :  $[\text{M}+\text{H}]^+$  479.1570, Found 479.1553.

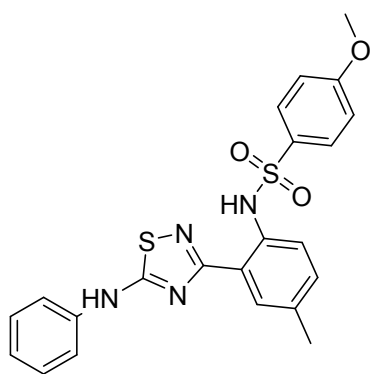

**4c:**

White solid,;  $^1\text{H}$  NMR (500 MHz,  $\text{CDCl}_3$ )  $\delta$  11.17 (s, 1H), 8.77 (s, 1H), 7.87 (s, 1H), 7.62-7.55 (m, 2H), 7.49 (d,  $J = 8.4$  Hz, 1H), 7.38-7.32 (m, 2H), 7.19-7.17 (m, 2H), 7.11 (t,  $J = 7.4$  Hz, 1H), 7.06 (dd,  $J = 8.4, 1.9$  Hz, 1H), 6.72-6.63 (m, 2H), 3.64 (s, 3H), 2.18 ppm (s, 3H).  $^{13}\text{C}$  NMR (126 MHz,  $\text{CDCl}_3$ )  $\delta$  179.50, 167.53, 162.85, 138.81, 134.41, 133.65, 132.04, 130.77, 130.57, 129.97, 129.27, 124.74, 120.97, 120.94, 118.56, 113.94, 55.48, 20.70 ppm. HRMS (ESI): Calculated for  $\text{C}_{22}\text{H}_{20}\text{N}_4\text{O}_3\text{S}_2$ :  $[\text{M}+\text{H}]^+$  453.1050, Found 453.1030.

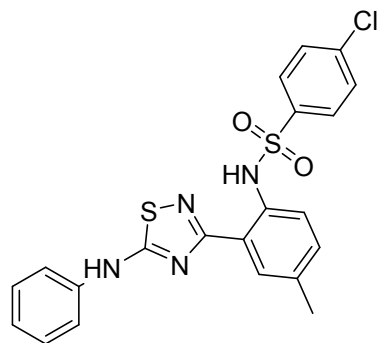

**4d:**

White solid,  $^1\text{H}$  NMR (500 MHz,  $\text{CDCl}_3$ )  $\delta$  11.17 (s, 1H), 8.69 (s, 1H), 7.87 (s, 1H), 7.55 (d,  $J = 8.6$  Hz, 2H), 7.49 (d,  $J = 8.3$  Hz, 1H), 7.35 (t,  $J = 7.9$  Hz, 2H), 7.19-7.15 (m, 4H), 7.11 (t,  $J = 7.4$  Hz, 1H), 7.07 (d,  $J = 8.3$  Hz, 1H), 2.18 ppm (s, 3H).  $^{13}\text{C}$  NMR (126 MHz,  $\text{CDCl}_3$ )  $\delta$  179.68, 167.50, 139.21, 138.74, 137.56, 134.28, 133.82, 132.12, 130.75, 130.01, 129.03, 128.56, 124.93, 121.37, 121.29, 118.71, 20.73 ppm. HRMS (ESI): Calculated for  $\text{C}_{21}\text{H}_{17}\text{ClN}_4\text{O}_2\text{S}_2$ :  $[\text{M}+\text{H}]^+$  457.0554, Found 457.0531.

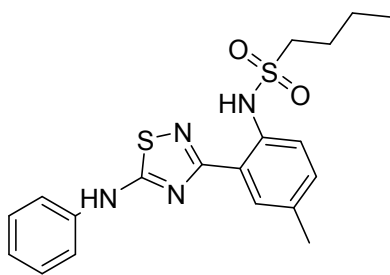

**4e:**

White solid,  $^1\text{H}$  NMR (500 MHz,  $\text{CDCl}_3$ )  $\delta$  11.07 (s, 1H), 8.76 (s, 1H), 8.05 (s, 1H), 7.57 (d,  $J = 8.4$  Hz, 1H), 7.33 (t,  $J = 7.9$  Hz, 2H), 7.20 (d,  $J = 7.7$  Hz, 2H), 7.14-7.05 (m, 2H), 3.07-2.95 (m, 2H), 2.23 (s, 3H), 1.67-1.58 (m, 2H), 1.26-1.17 (m, 2H), 0.71 ppm (t,  $J = 7.4$  Hz, 3H).  $^{13}\text{C}$  NMR (126 MHz,  $\text{CDCl}_3$ )  $\delta$  179.58, 167.85, 138.83, 134.88, 133.21, 132.34, 131.11, 129.91, 124.72, 119.90, 119.09, 118.65, 51.26, 25.25, 21.35, 20.69, 13.50 ppm. HRMS (ESI): Calculated for  $\text{C}_{19}\text{H}_{22}\text{N}_4\text{O}_2\text{S}_2$ :  $[\text{M}+\text{H}]^+$  403.1257, Found 403.1233.

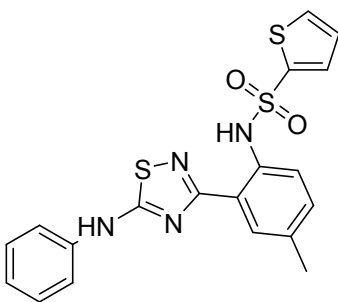

**4f:**

White solid,  $^1\text{H}$  NMR (500 MHz,  $\text{DMSO}-d_6$ )  $\delta$  11.45 (s, 1H), 11.24 (s, 1H), 8.01 (s,

1H), 7.84 (dd,  $J = 5.0, 1.3$  Hz, 1H), 7.59 (d,  $J = 8.3$  Hz, 3H), 7.52-7.43 (m, 3H), 7.32 (dd,  $J = 8.4, 1.9$  Hz, 1H), 7.16 (t,  $J = 7.4$  Hz, 1H), 7.08-6.98 (m, 1H), 2.32 ppm (s, 3H).  $^{13}\text{C}$  NMR (126 MHz,  $\text{DMSO-}d_6$ )  $\delta$  178.77, 167.54, 139.78, 139.30, 134.56, 134.32, 133.99, 133.44, 132.38, 131.05, 130.04, 128.06, 124.04, 121.63, 121.17, 118.65, 20.84 ppm. HRMS (ESI): Calculated for  $\text{C}_{19}\text{H}_{16}\text{N}_4\text{O}_2\text{S}_3$ :  $[\text{M}+\text{H}]^+$  429.0508, Found 429.0489.

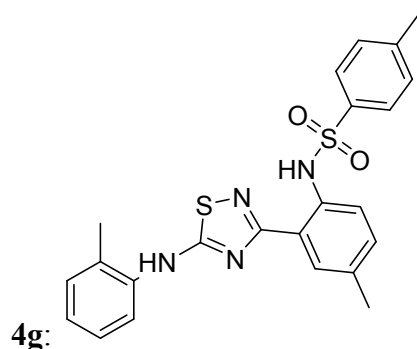

White solid,  $^1\text{H}$  NMR (500 MHz,  $\text{CDCl}_3$ )  $\delta$  11.10 (s, 1H), 7.89 (s, 1H), 7.85 (s, 1H), 7.55-7.47 (m, 3H), 7.35 (d,  $J = 7.7$  Hz, 1H), 7.28-7.22 (m, 2H), 7.13 (t,  $J = 7.4$  Hz, 1H), 7.06 (dd,  $J = 8.3, 1.6$  Hz, 1H), 7.02 (d,  $J = 8.1$  Hz, 2H), 2.27 (s, 3H), 2.21 (s, 3H), 2.19 ppm (s, 3H).  $^{13}\text{C}$  NMR (126 MHz,  $\text{CDCl}_3$ )  $\delta$  180.48, 167.18, 142.35, 136.22, 135.38, 133.44, 132.53, 130.91, 130.63, 129.63, 129.60, 128.30, 126.70, 126.09, 125.60, 120.08, 119.93, 20.45, 19.66, 16.67 ppm. HRMS (ESI): Calculated for  $\text{C}_{23}\text{H}_{22}\text{N}_4\text{O}_2\text{S}_2$ :  $[\text{M}+\text{H}]^+$  451.1257, Found 451.1234.

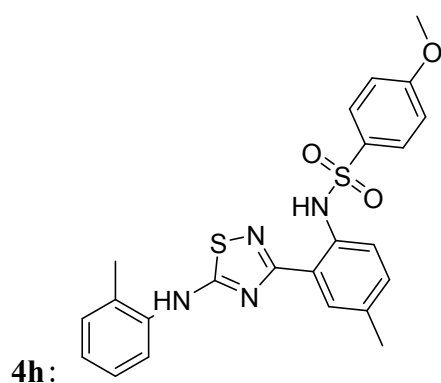

White solid,  $^1\text{H}$  NMR (500 MHz,  $\text{CDCl}_3$ )  $\delta$  11.08 (s, 1H), 8.01 (s, 1H), 7.83 (s, 1H), 7.55 (d,  $J = 8.9$  Hz, 2H), 7.49 (d,  $J = 8.4$  Hz, 1H), 7.35 (d,  $J = 7.9$  Hz, 1H), 7.25-7.18 (m, 2H), 7.11 (t,  $J = 7.4$  Hz, 1H), 7.04 (dd,  $J = 8.4, 1.5$  Hz, 1H), 6.67 (d,  $J = 8.9$  Hz, 2H), 3.64 (s, 3H), 2.25 (s, 3H), 2.16 ppm (s, 3H).  $^{13}\text{C}$  NMR (126 MHz,  $\text{CDCl}_3$ )  $\delta$

180.50, 167.22, 161.76, 136.27, 133.47, 132.52, 130.86, 130.58, 129.89, 129.66, 129.64, 128.19, 126.64, 125.54, 120.16, 120.02, 119.97, 112.84, 54.43, 19.64, 16.65 ppm. HRMS (ESI): Calculated for C<sub>23</sub>H<sub>22</sub>N<sub>4</sub>O<sub>3</sub>S<sub>2</sub>: [M+H]<sup>+</sup> 467.1206, Found 467.1194.

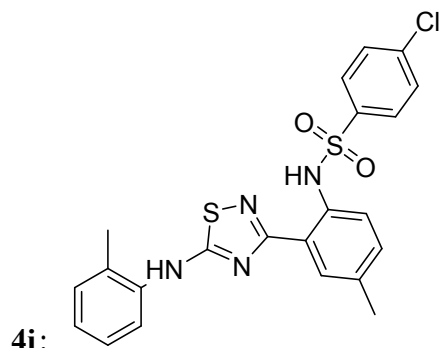

White solid, <sup>1</sup>H NMR (500 MHz, CDCl<sub>3</sub>) δ 11.06 (s, 1H), 7.88 (s, 1H), 7.85 (s, 1H), 7.54-7.49 (m, 3H), 7.33 (d, *J* = 7.6 Hz, 1H), 7.27-7.22 (m, 2H), 7.19-7.17 (m, 2H), 7.14 (t, *J* = 7.4 Hz, 1H), 7.08 (d, *J* = 8.4 Hz, 1H), 2.27 (s, 3H), 2.21 ppm (s, 3H). <sup>13</sup>C NMR (126 MHz, CDCl<sub>3</sub>) δ 180.59, 167.07, 138.04, 136.69, 136.12, 133.21, 132.91, 131.01, 130.68, 129.80, 129.76, 127.91, 127.50, 126.74, 125.78, 120.51, 120.33, 120.19, 19.70, 16.66 ppm. HRMS (ESI): Calculated for C<sub>22</sub>H<sub>19</sub>ClN<sub>4</sub>O<sub>2</sub>S<sub>2</sub>: [M+H]<sup>+</sup> 471.0711, Found 471.0692.

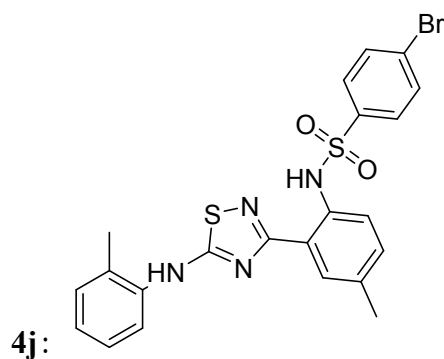

White solid, <sup>1</sup>H NMR (500 MHz, CDCl<sub>3</sub>) δ 11.07 (s, 1H), 7.86 (s, 1H), 7.77 (s, 1H), 7.52-7.41 (m, 3H), 7.37-7.30 (m, 3H), 7.29-7.20 (m, 2H), 7.16-7.11 (m, 1H), 7.10-7.05 (m, 1H), 2.28 (s, 3H), 2.22 ppm (s, 3H). <sup>13</sup>C NMR (126 MHz, CDCl<sub>3</sub>) δ 180.65, 167.25, 137.26, 136.15, 133.20, 132.90, 130.98, 130.89, 130.68, 129.80, 129.77, 127.58, 126.76, 126.57, 125.76, 120.51, 120.43, 120.21, 19.71, 16.67 ppm. HRMS (ESI): Calculated for C<sub>22</sub>H<sub>19</sub>BrN<sub>4</sub>O<sub>2</sub>S<sub>2</sub>: [M+H]<sup>+</sup> 515.0206, Found 515.0193.

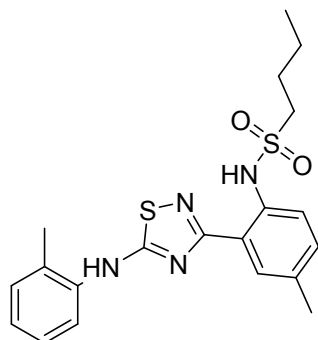

**4k:**

White solid,  $^1\text{H}$  NMR (500 MHz,  $\text{CDCl}_3$ )  $\delta$  10.97 (s, 1H), 8.04 (s, 1H), 8.00 (s, 1H), 7.58 (d,  $J = 8.4$  Hz, 1H), 7.37 (d,  $J = 7.8$  Hz, 1H), 7.27-7.19 (m, 2H), 7.14-7.09 (m, 2H), 3.02-2.94 (m, 2H), 2.27 (s, 3H), 2.25 (s, 3H), 1.66-1.55 (m, 2H), 1.29-1.20 (m, 2H), 0.72 ppm (t,  $J = 7.4$  Hz, 3H).  $^{13}\text{C}$  NMR (126 MHz,  $\text{CDCl}_3$ )  $\delta$  180.71, 167.40, 136.24, 133.97, 132.07, 131.23, 130.61, 130.07, 129.77, 126.68, 125.65, 120.30, 118.90, 118.11, 50.15, 24.22, 20.32, 19.63, 16.66, 12.48 ppm. HRMS (ESI): Calculated for  $\text{C}_{20}\text{H}_{24}\text{N}_4\text{O}_2\text{S}_2$ :  $[\text{M}+\text{H}]^+$  417.1414, Found 451.1401.

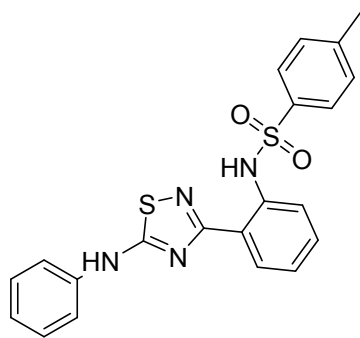

**4l:**

White solid,  $^1\text{H}$  NMR (500 MHz,  $\text{CDCl}_3$ )  $\delta$  11.47 (s, 1H), 8.62 (s, 1H), 8.18 (d,  $J = 7.9$  Hz, 1H), 7.67 (t,  $J = 7.9$  Hz, 3H), 7.44 (t,  $J = 7.9$  Hz, 2H), 7.33 (t,  $J = 8.5$  Hz, 1H), 7.29 (d,  $J = 7.8$  Hz, 2H), 7.20 (t,  $J = 7.4$  Hz, 1H), 7.12 (d,  $J = 8.1$  Hz, 2H), 7.08 (t,  $J = 8.0$  Hz, 1H), 2.29 ppm (s, 3H).  $^{13}\text{C}$  NMR (126 MHz,  $\text{CDCl}_3$ )  $\delta$  179.36, 167.53, 143.66, 138.70, 137.01, 136.33, 131.30, 130.52, 130.00, 129.49, 127.18, 124.89, 123.72, 120.50, 120.15, 118.66, 21.49 ppm. HRMS (ESI): Calculated for  $\text{C}_{21}\text{H}_{18}\text{N}_4\text{O}_2\text{S}_2$ :  $[\text{M}+\text{H}]^+$  423.0944, Found 423.0919.



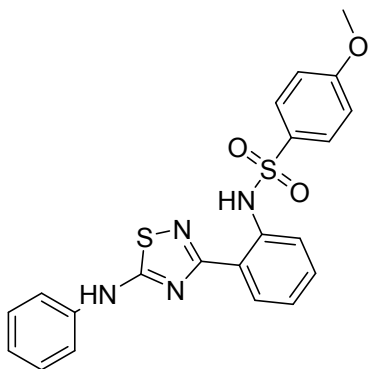

**4m:**

White solid,  $^1\text{H}$  NMR (500 MHz,  $\text{CDCl}_3$ )  $\delta$  11.46 (s, 1H), 8.66 (s, 1H), 8.18 (dd,  $J = 7.9, 1.2$  Hz, 1H), 7.71 (d,  $J = 8.9$  Hz, 2H), 7.67 (d,  $J = 8.2$  Hz, 1H), 7.43 (t,  $J = 7.9$  Hz, 2H), 7.34-7.27 (m, 3H), 7.18 (t,  $J = 7.4$  Hz, 1H), 7.07 (t,  $J = 7.6$  Hz, 1H), 6.78 (d,  $J = 8.9$  Hz, 2H), 3.73 (s, 3H).  $^{13}\text{C}$  NMR (126 MHz,  $\text{CDCl}_3$ )  $\delta$  179.38, 167.68, 162.95, 138.78, 137.05, 131.24, 130.83, 130.57, 129.96, 129.32, 124.78, 123.72, 120.67, 120.22, 118.65, 114.04, 55.51. HRMS (ESI): Calculated for  $\text{C}_{21}\text{H}_{18}\text{N}_4\text{O}_3\text{S}_2$ :  $[\text{M}+\text{H}]^+$  439.0893, Found 439.0875.

#### 4. $^1\text{H}$ and $^{13}\text{C}$ NMR spectra of the products

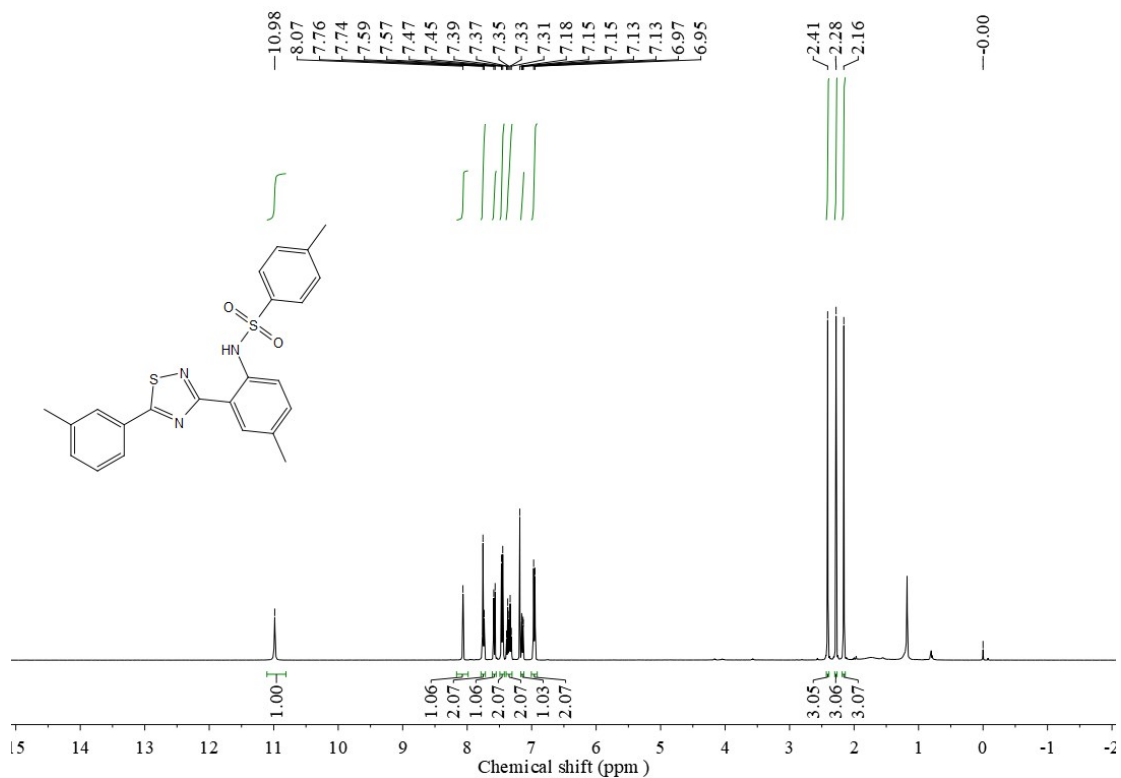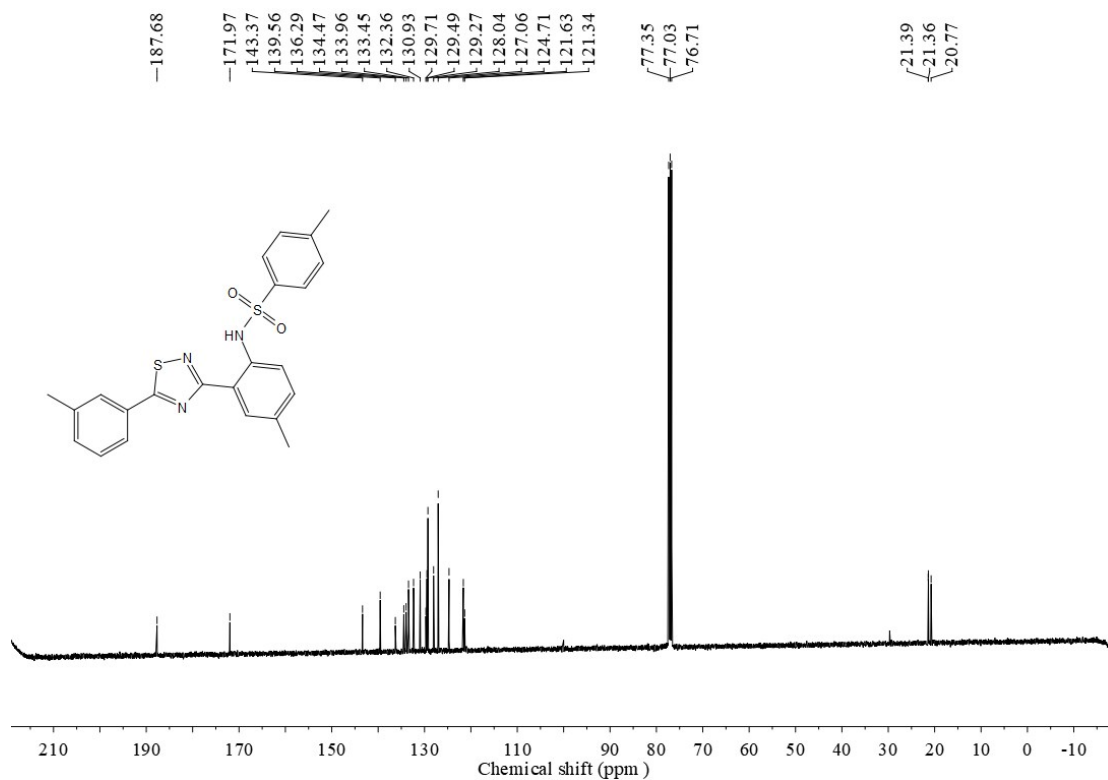

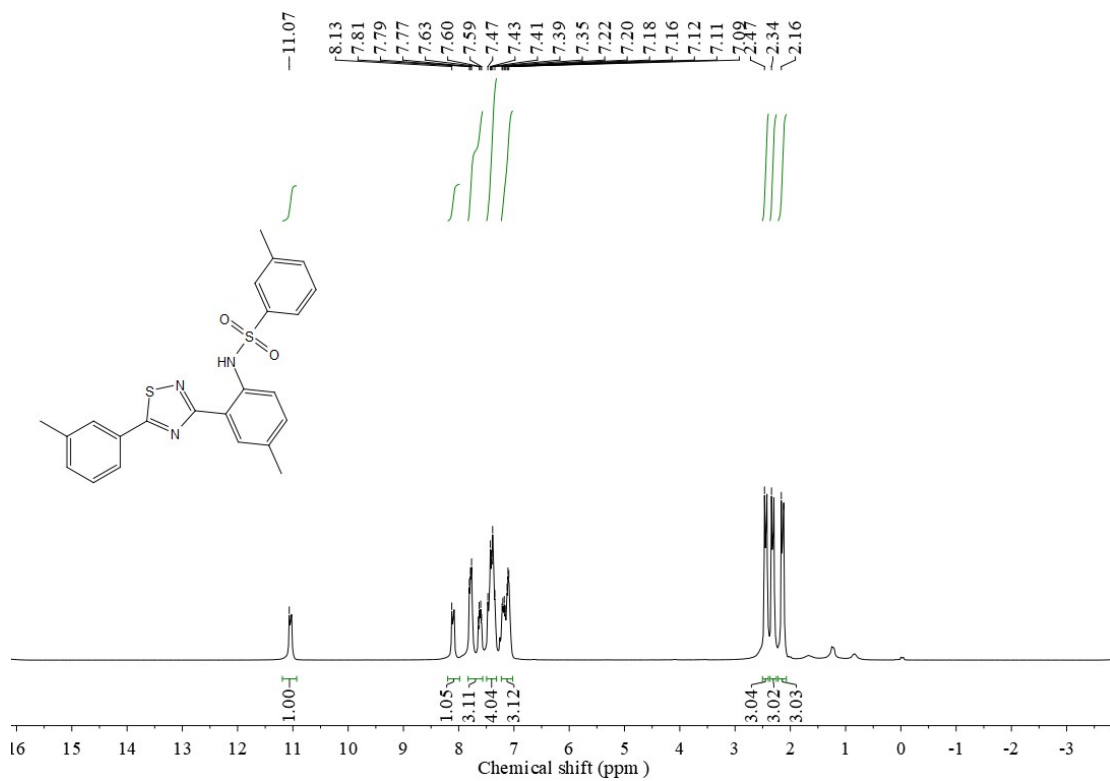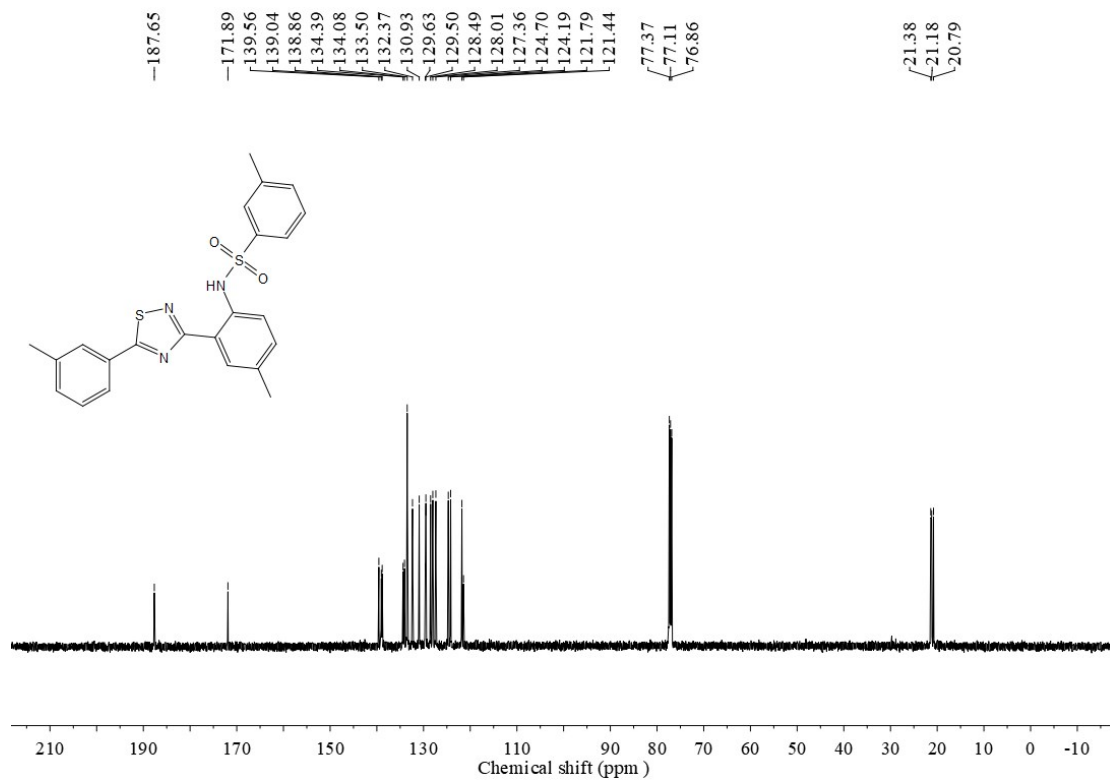

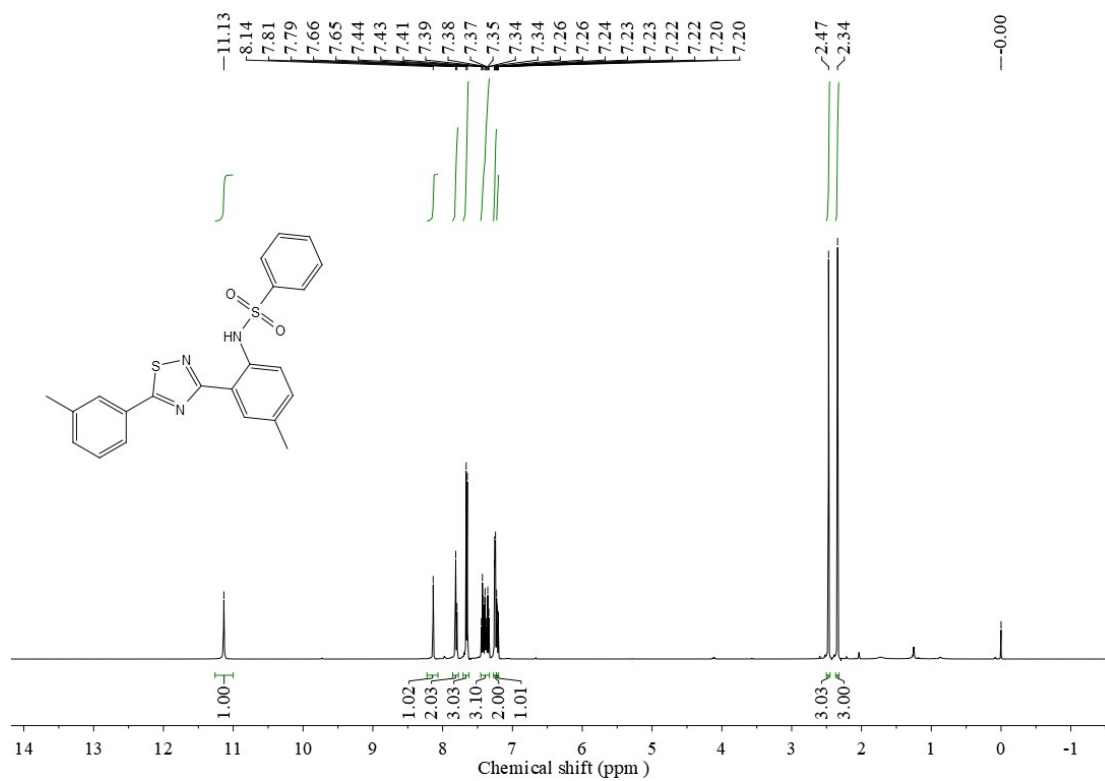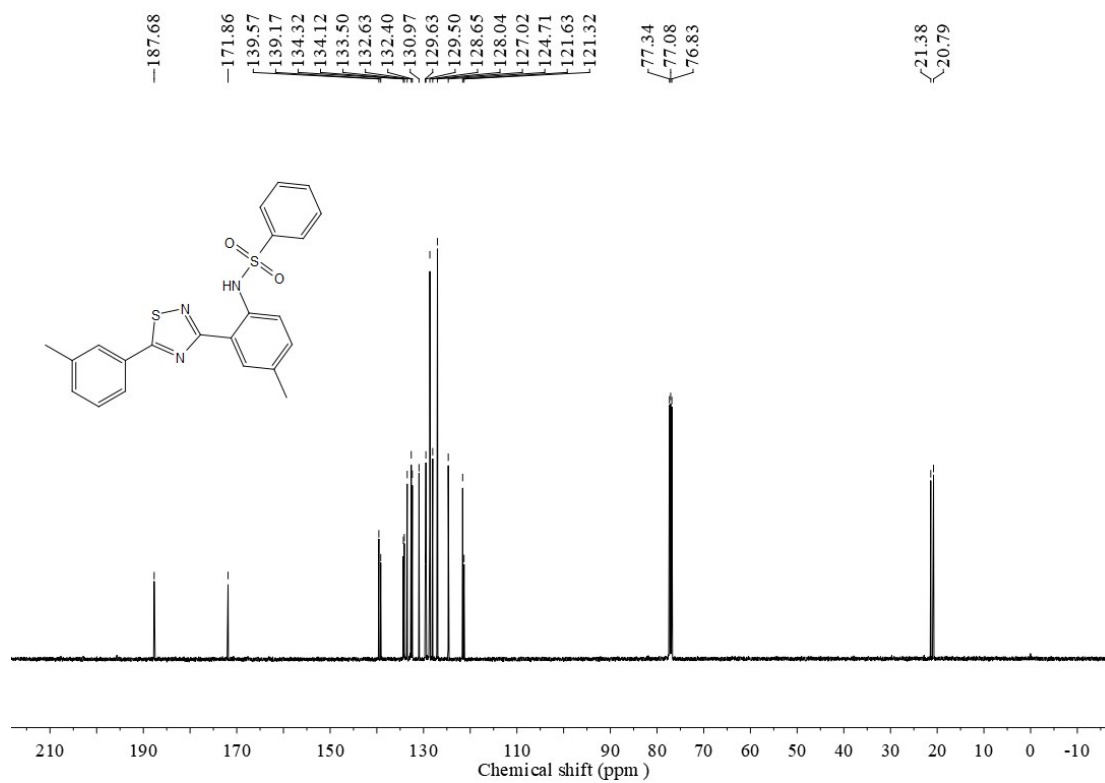

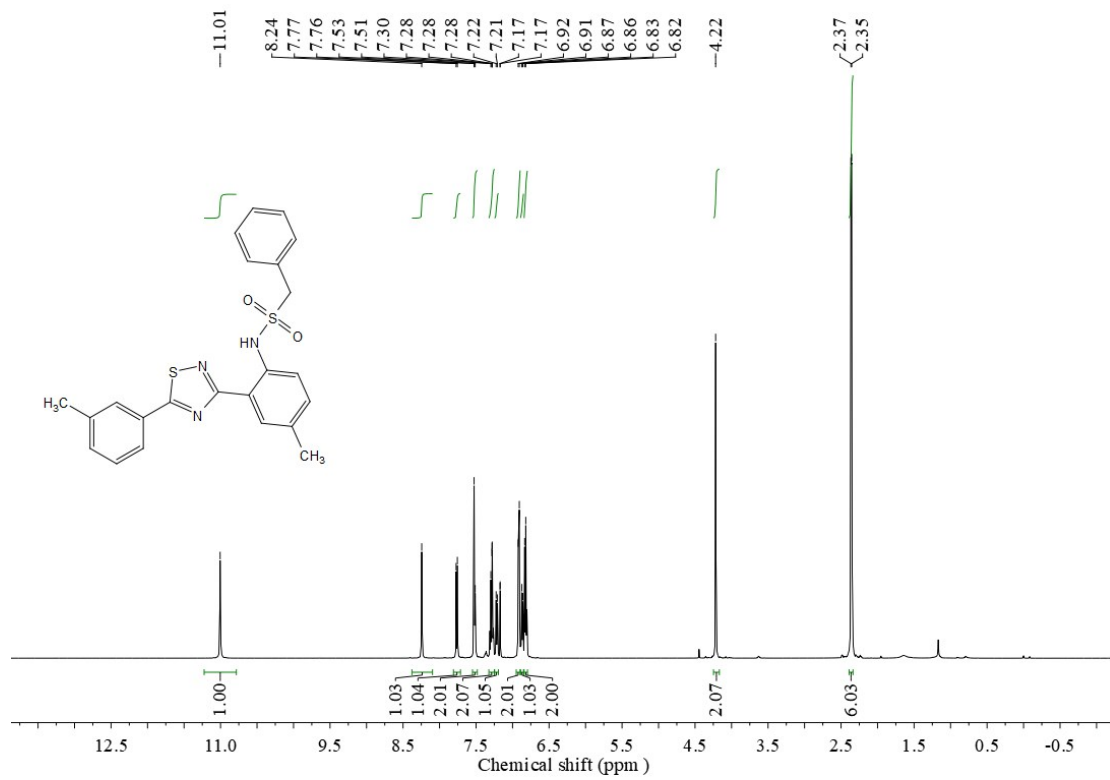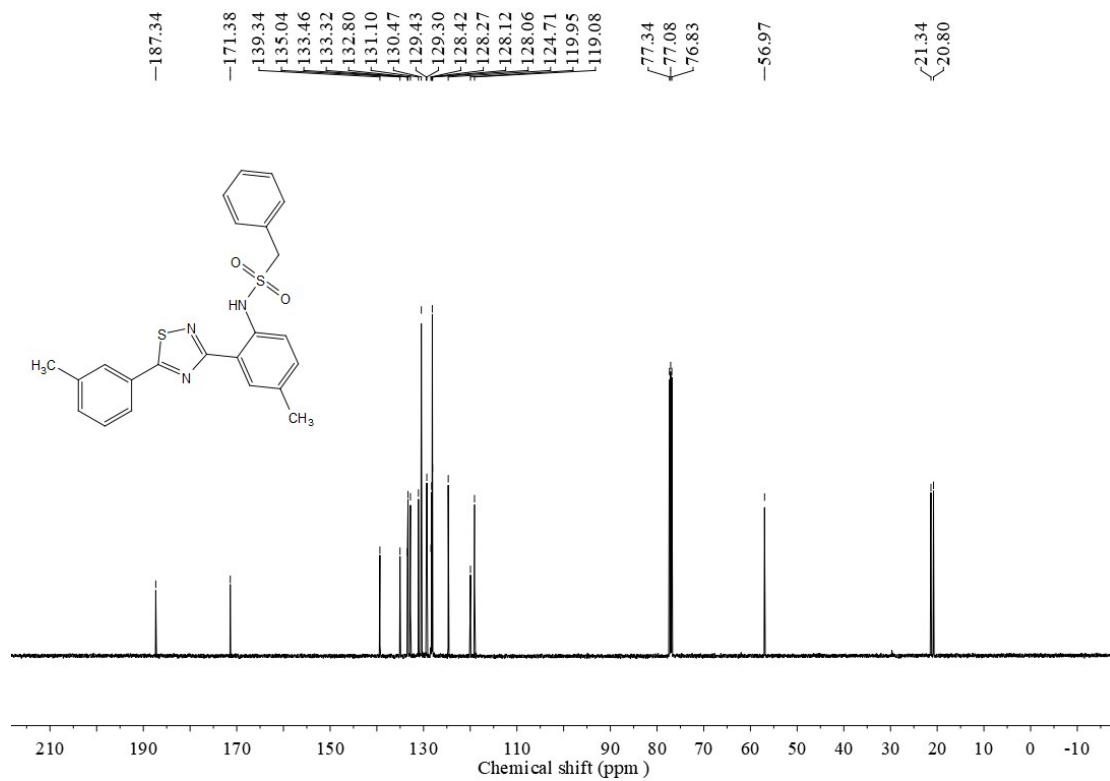

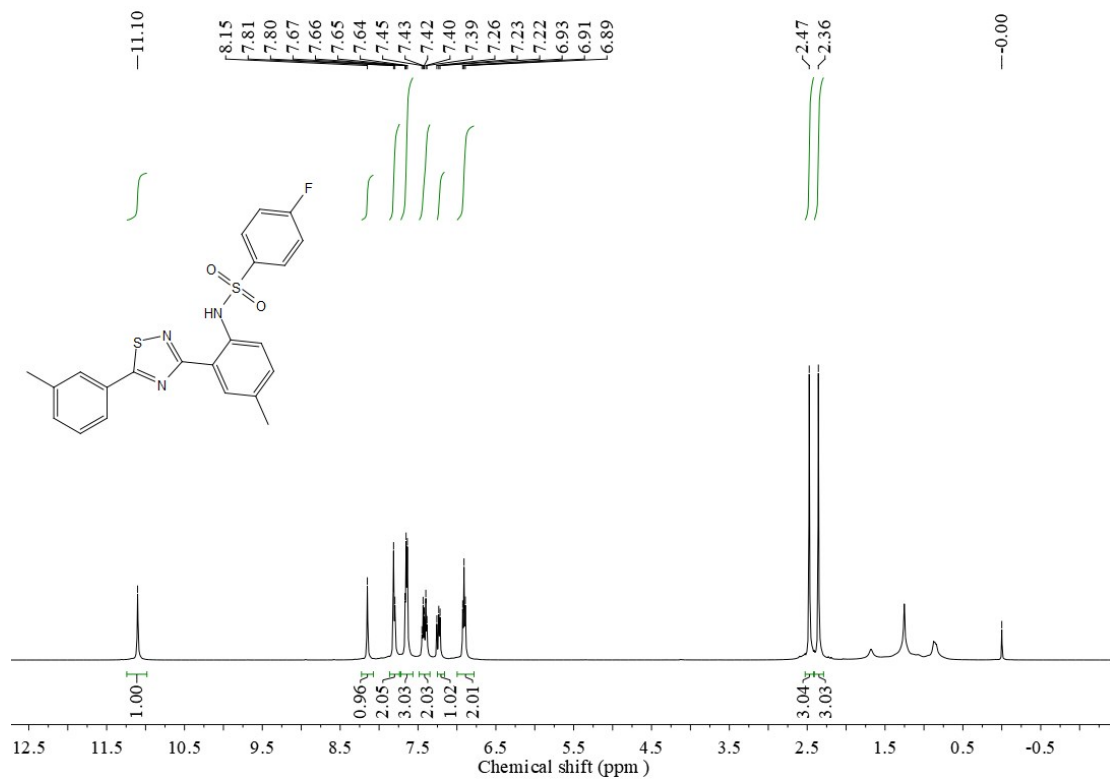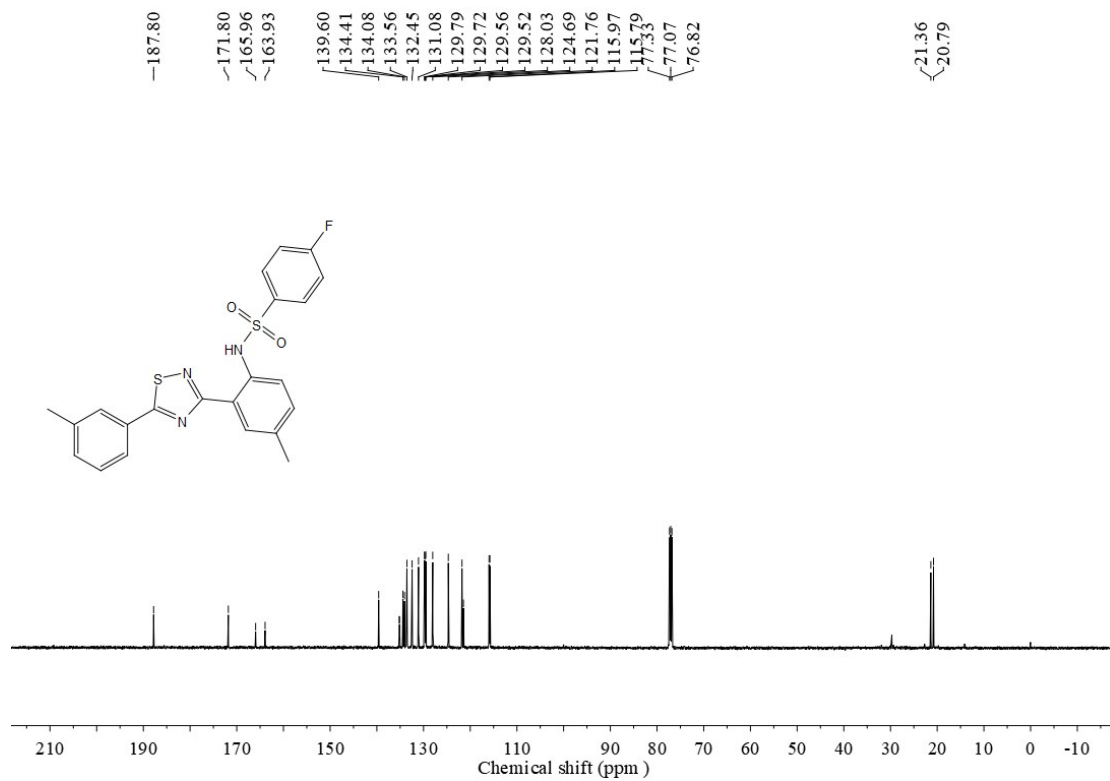

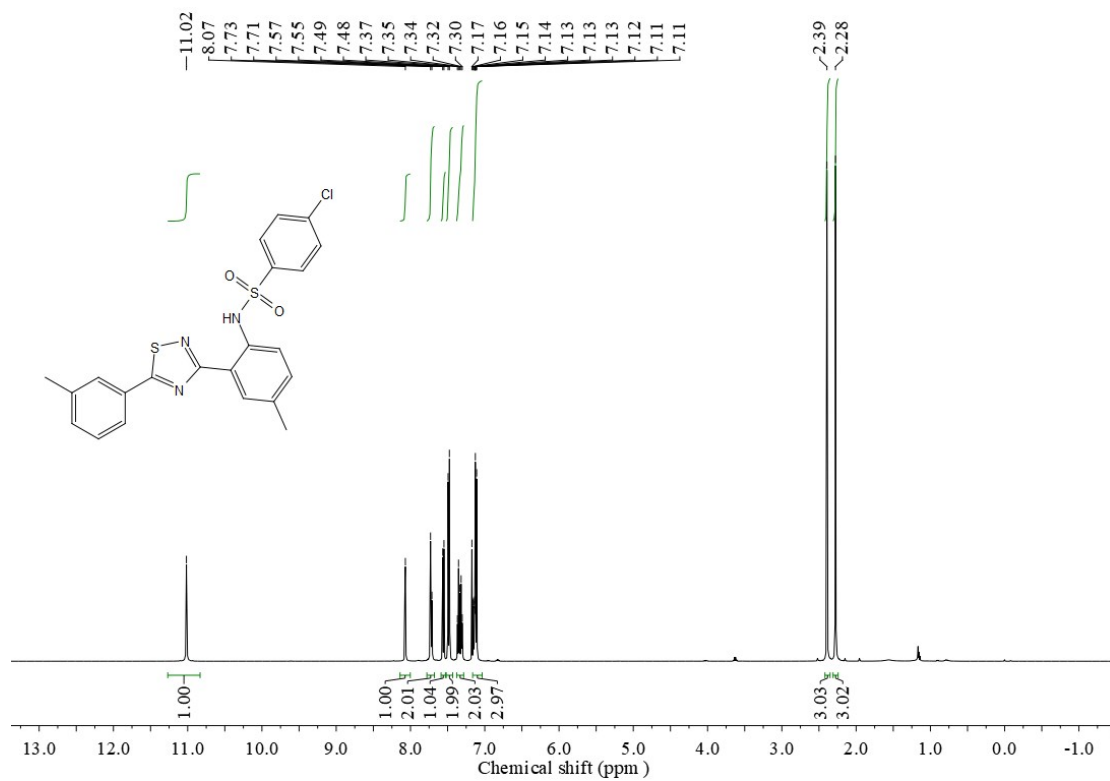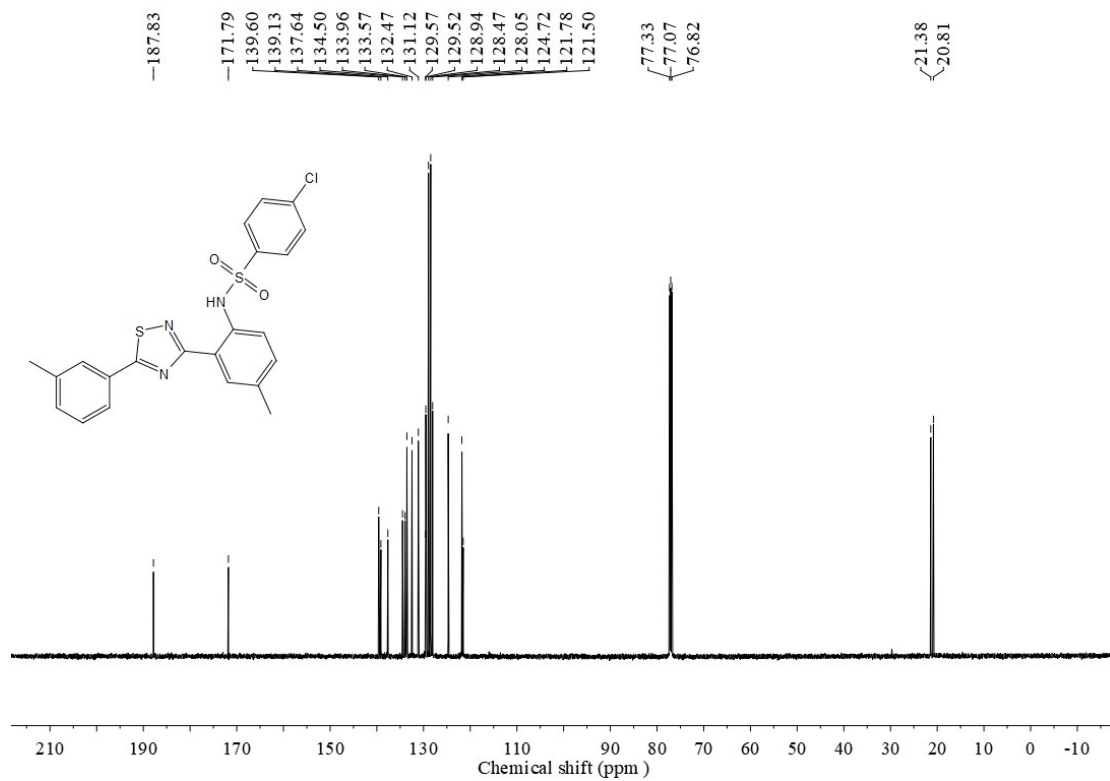

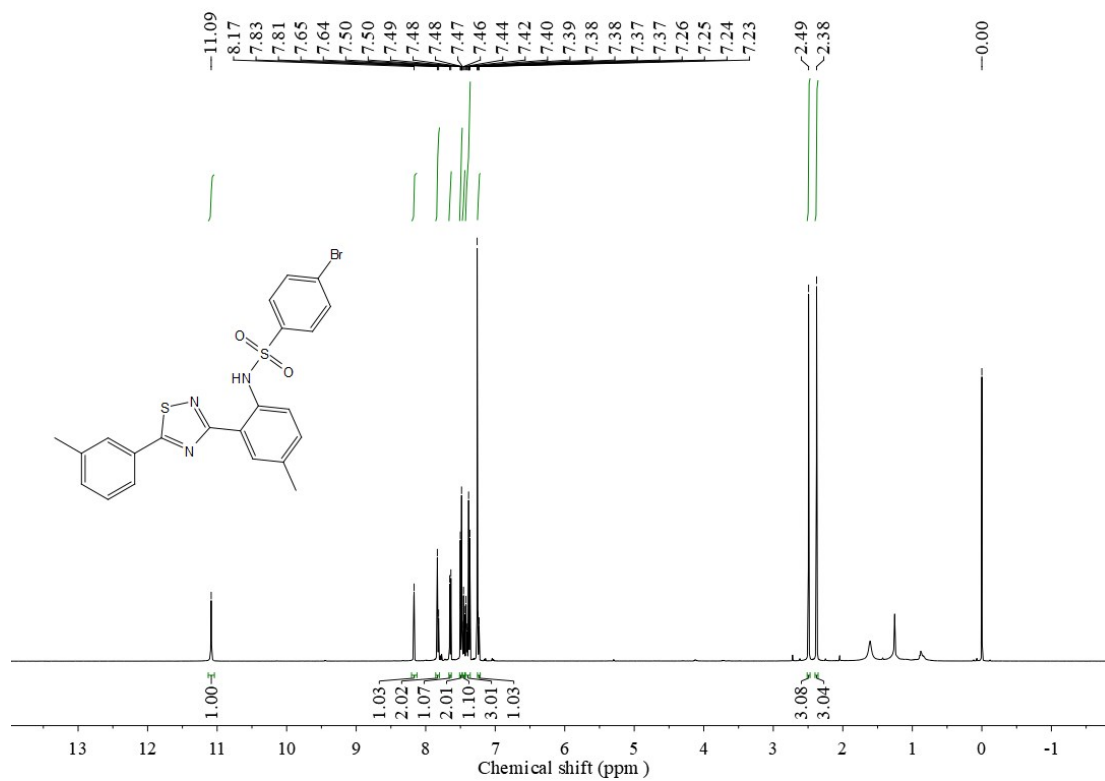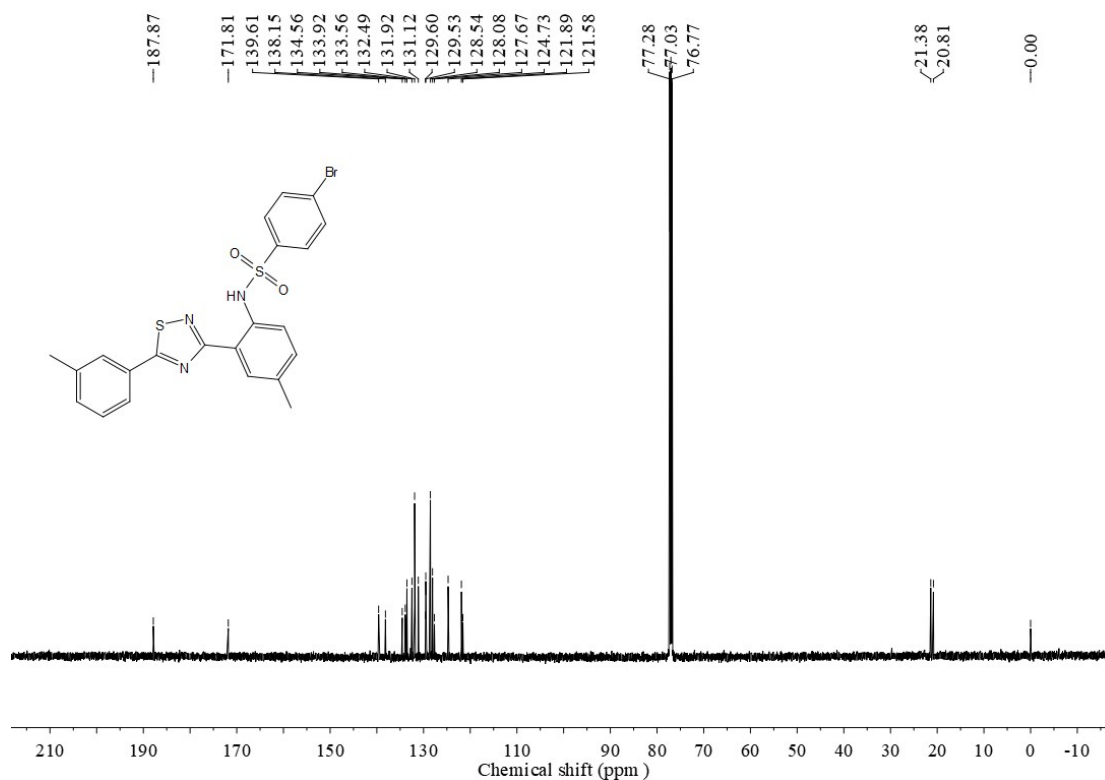



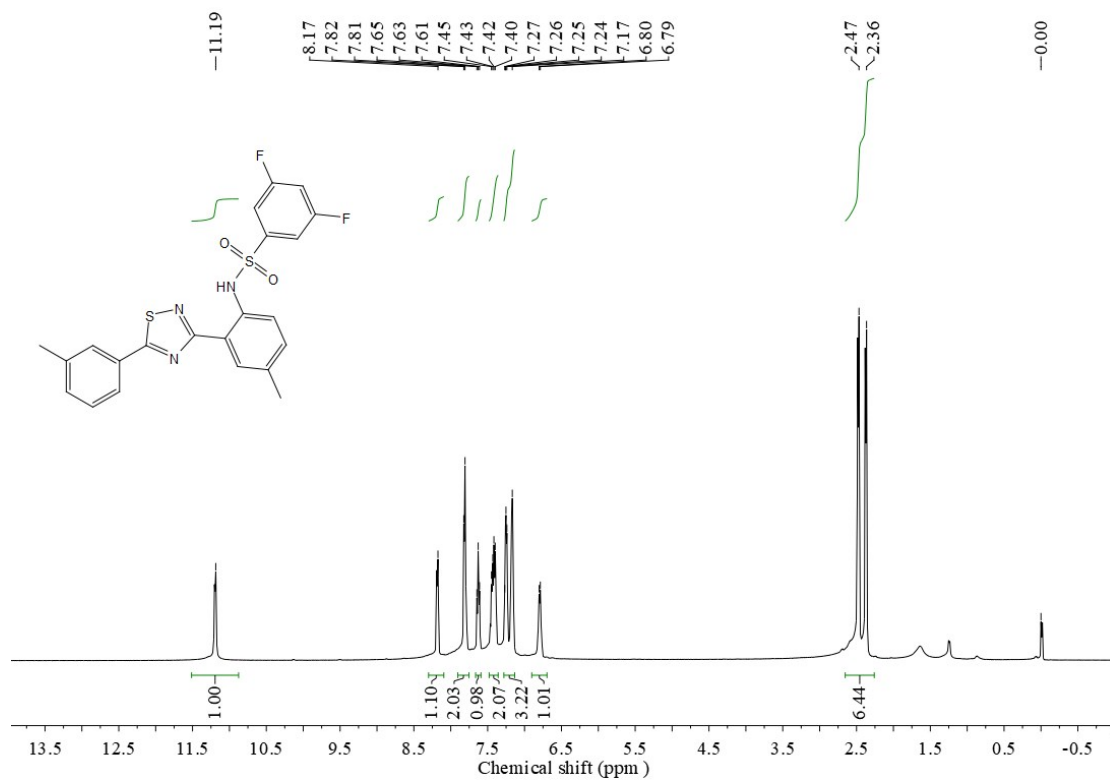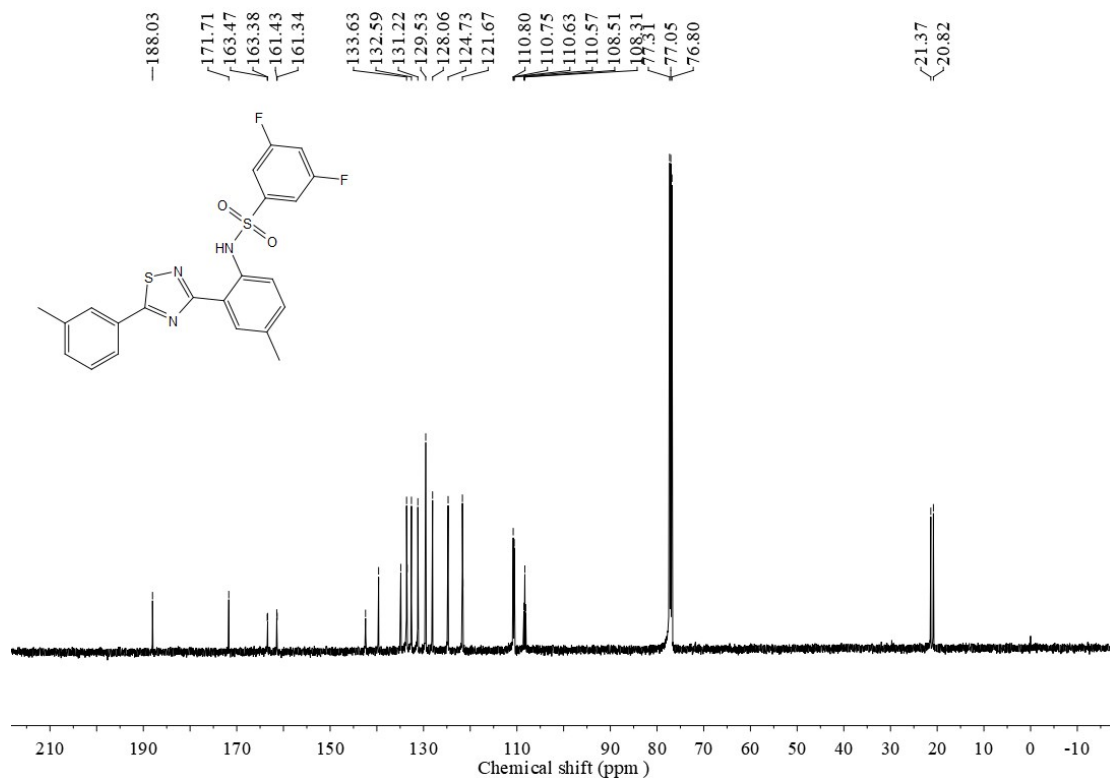

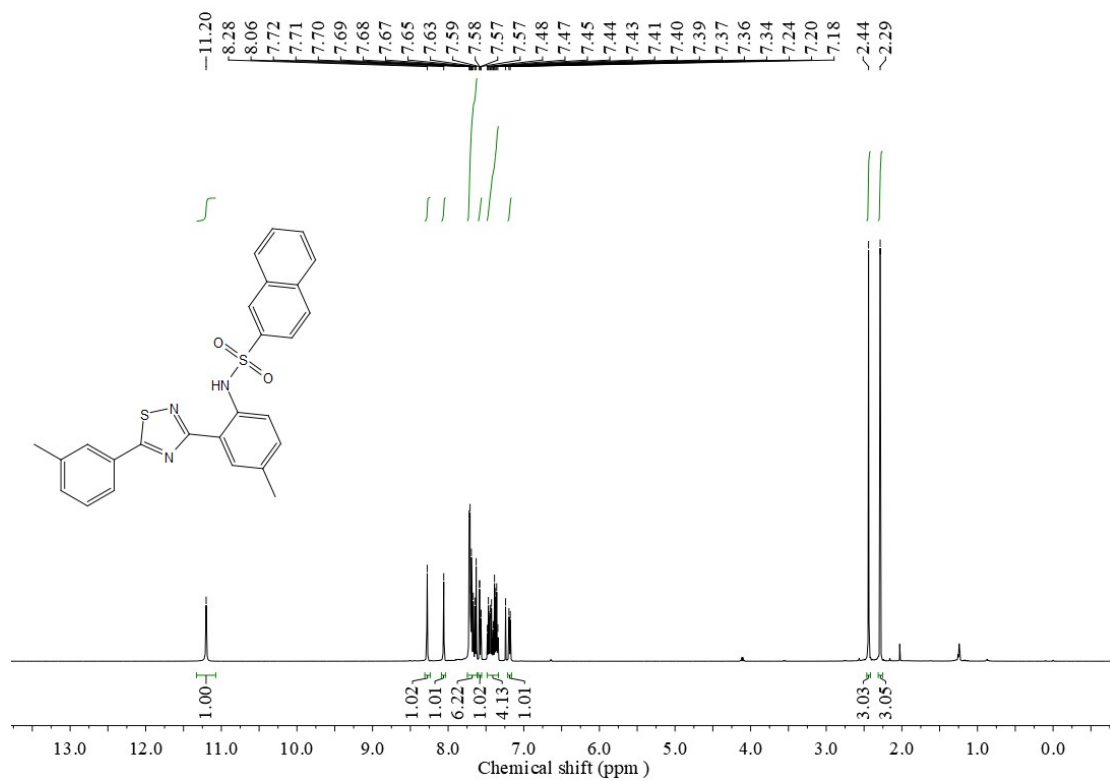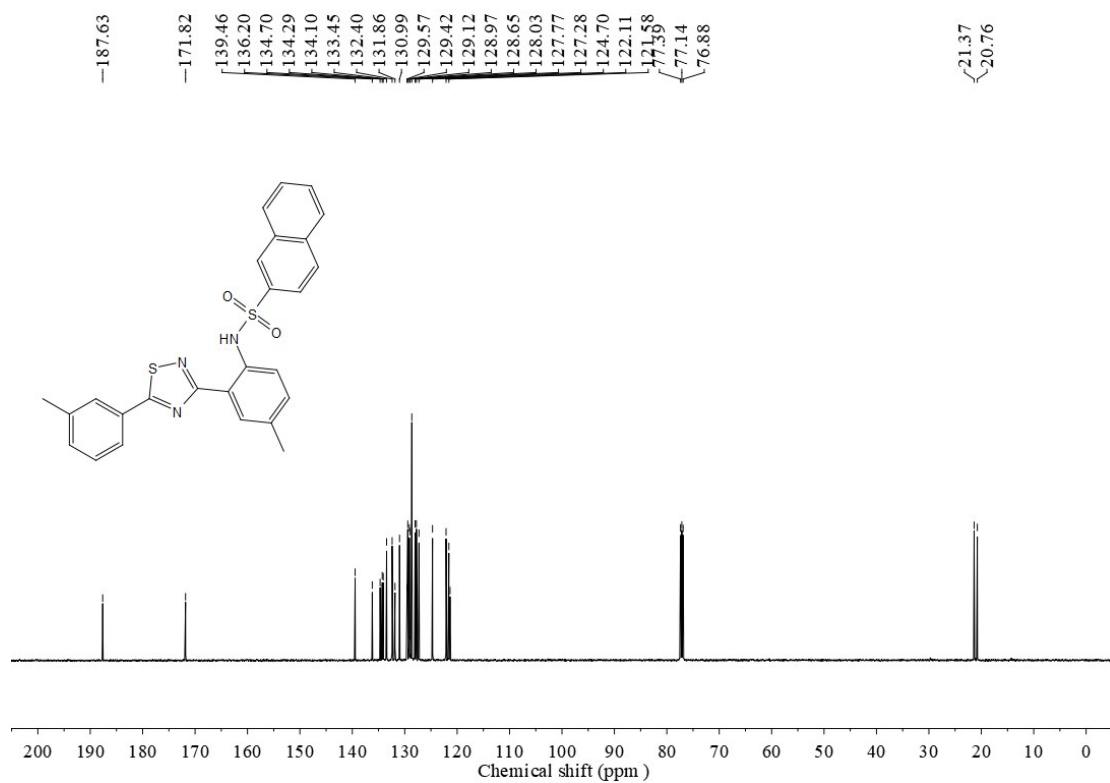

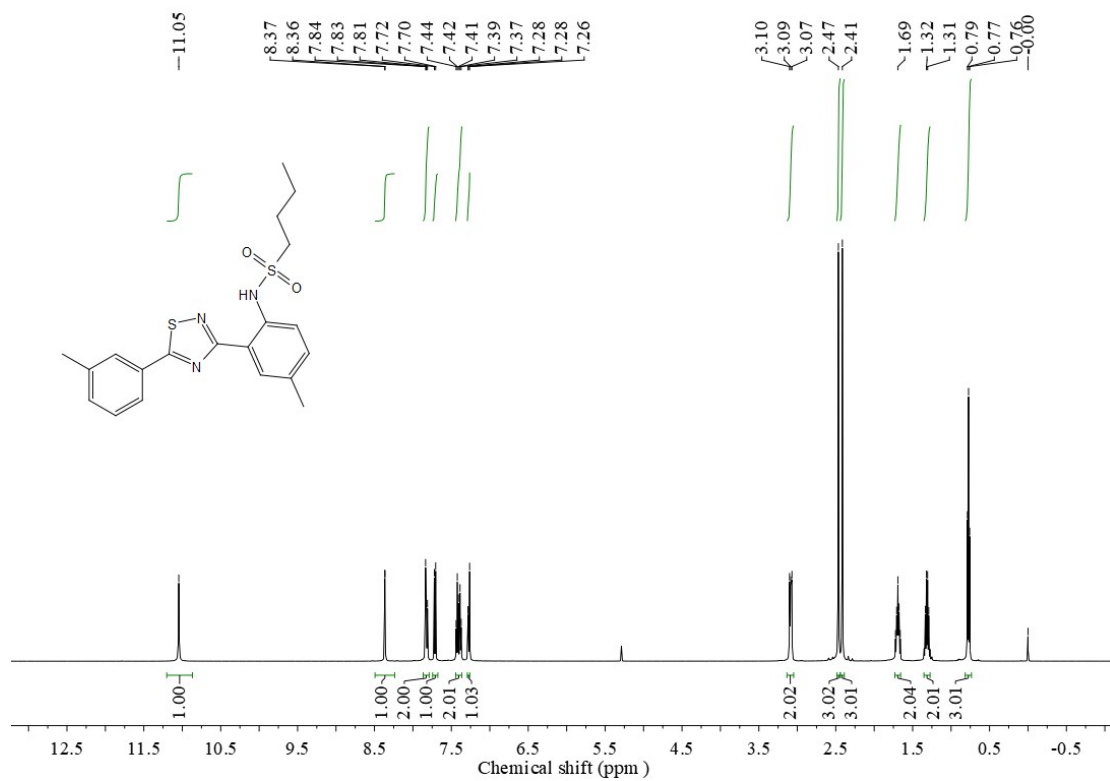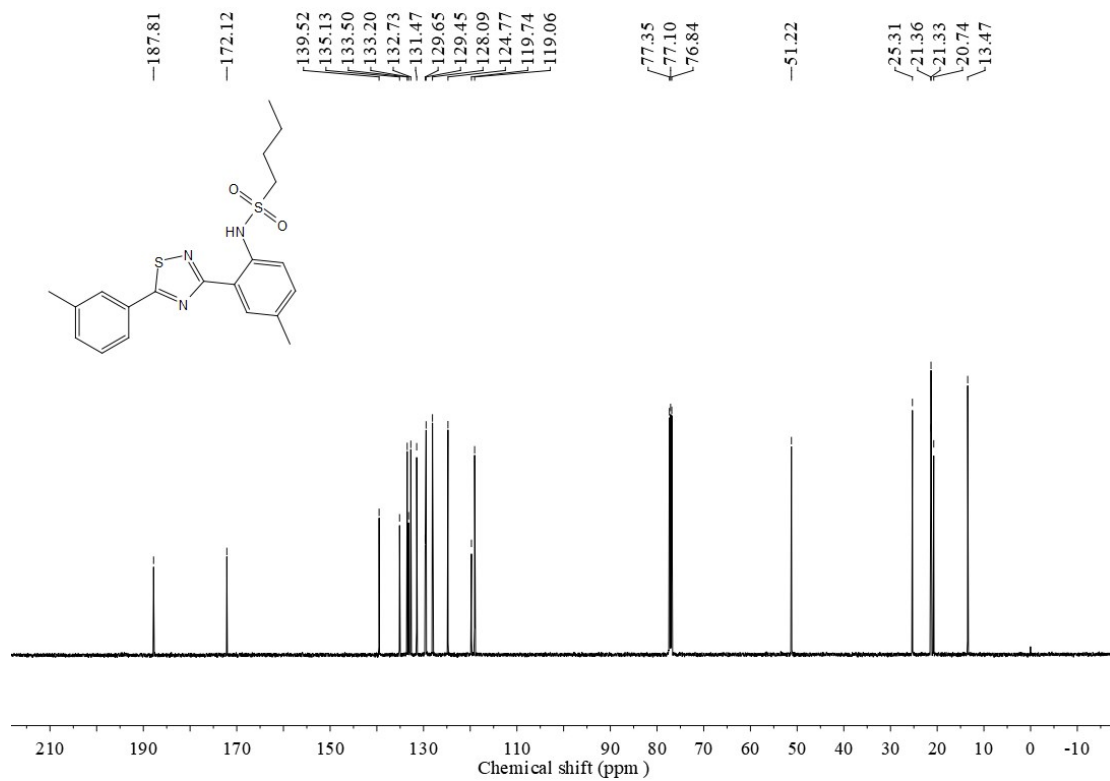

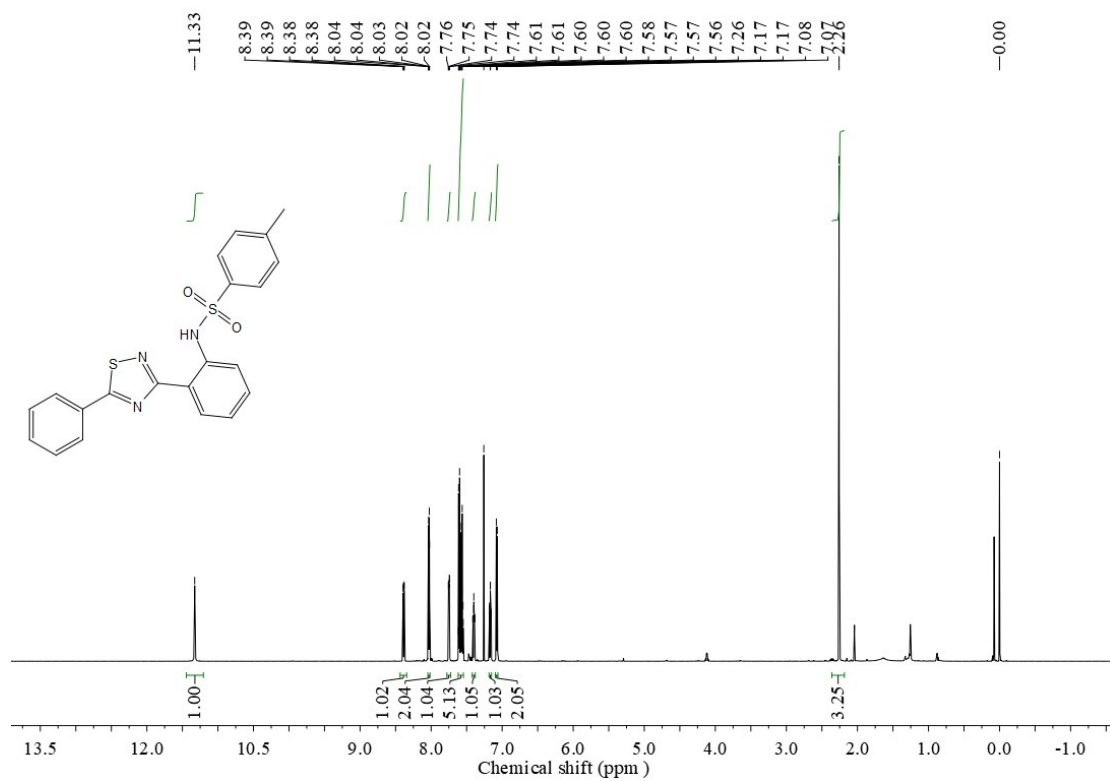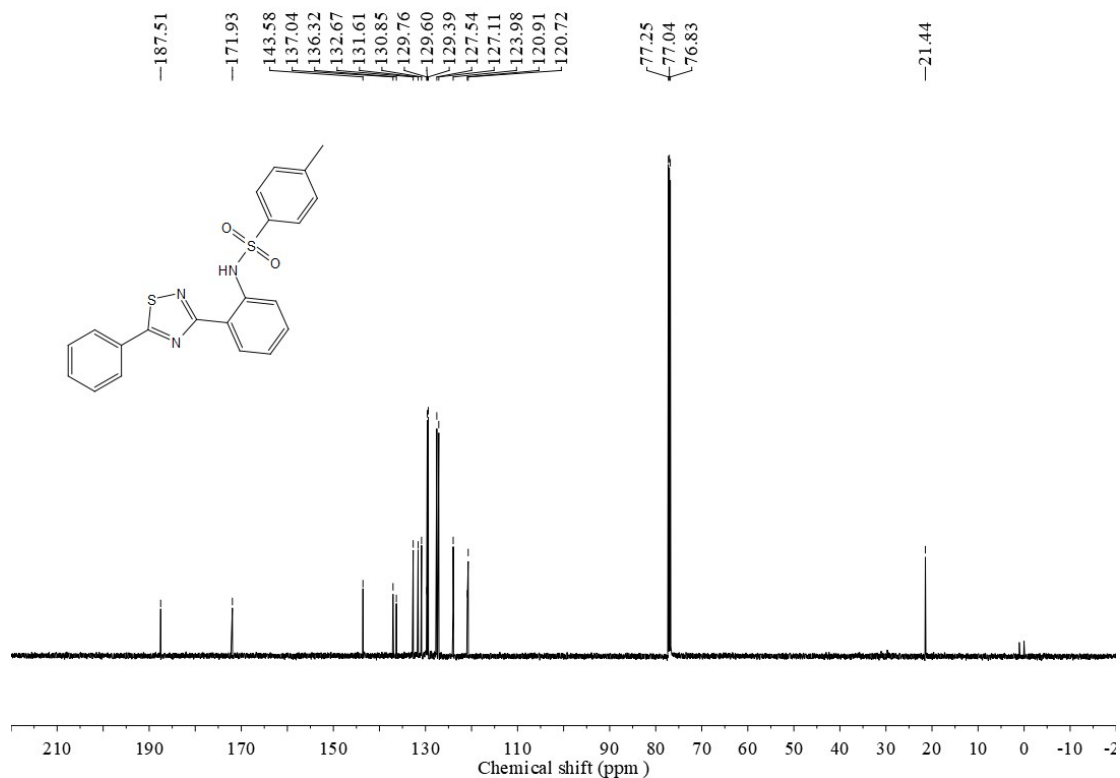

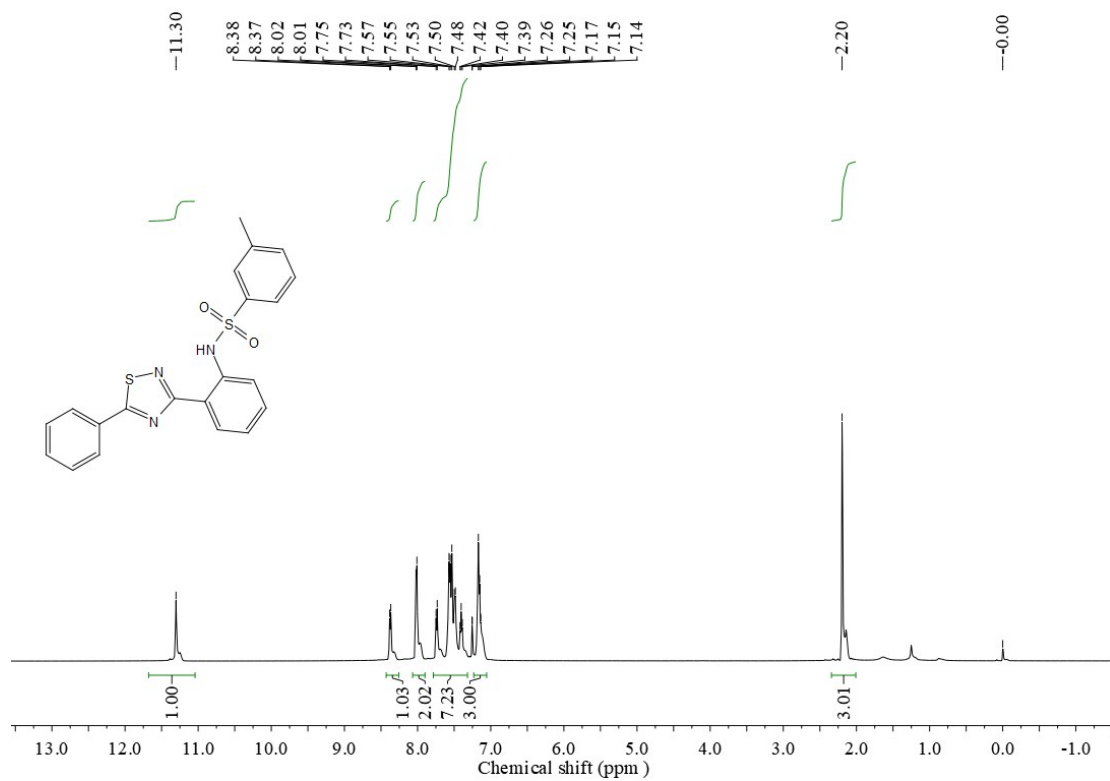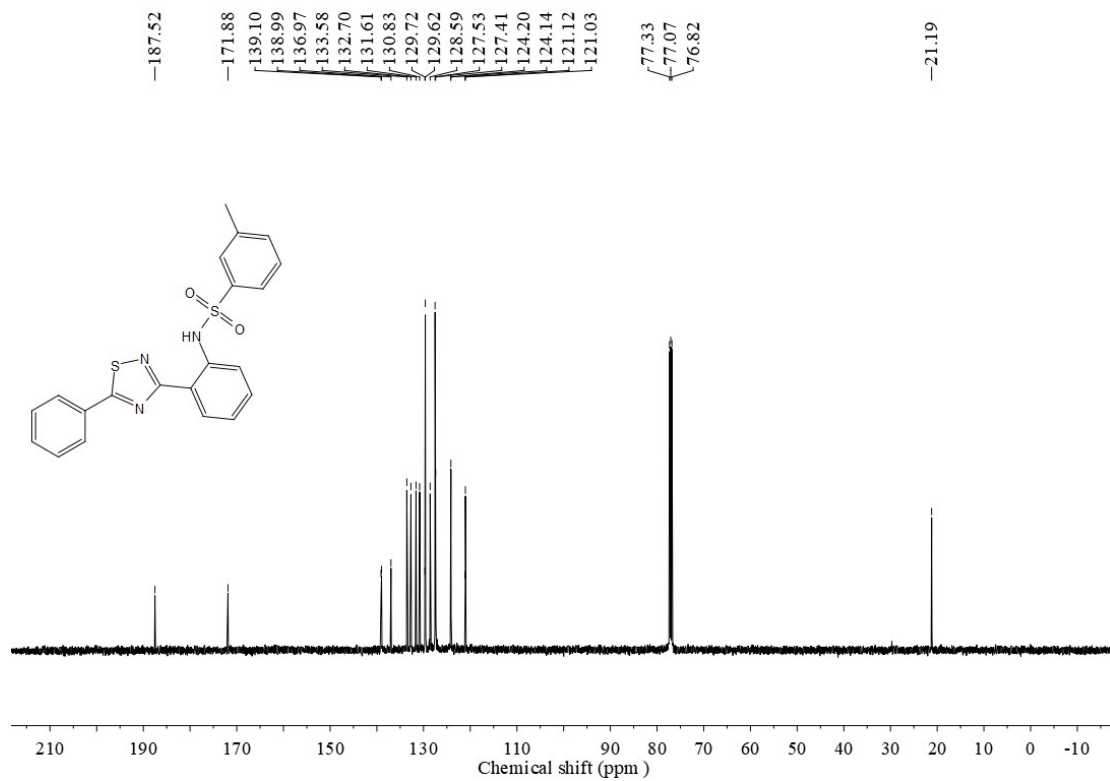

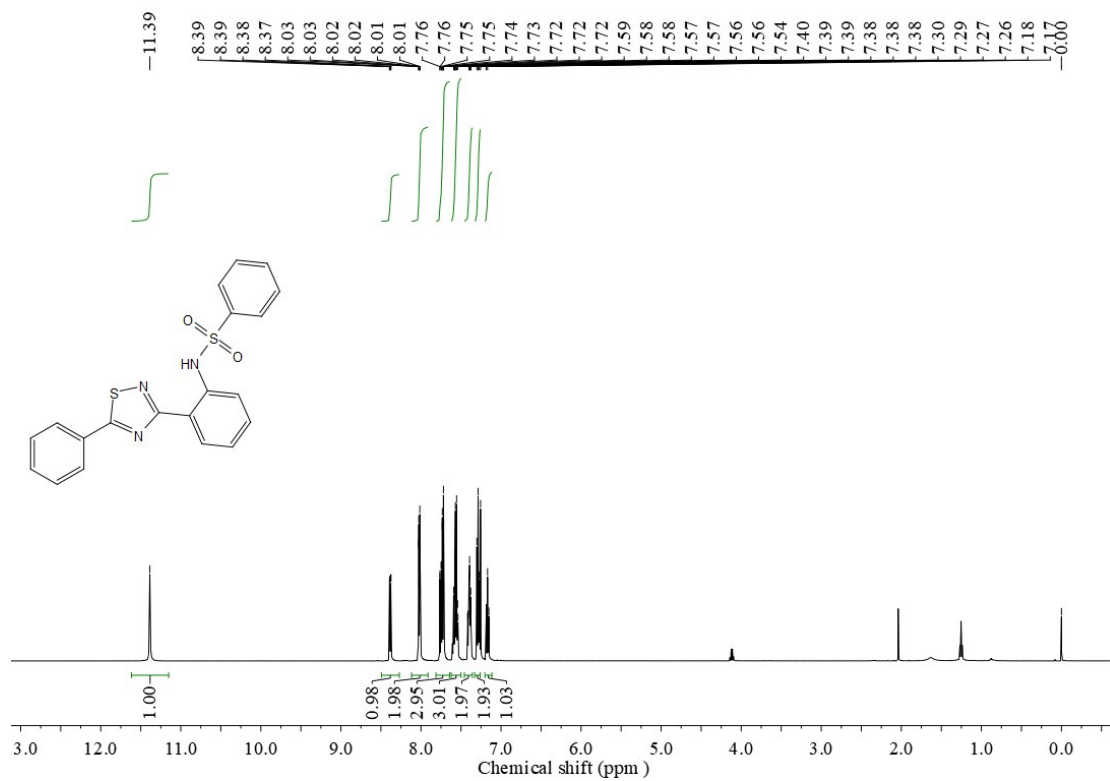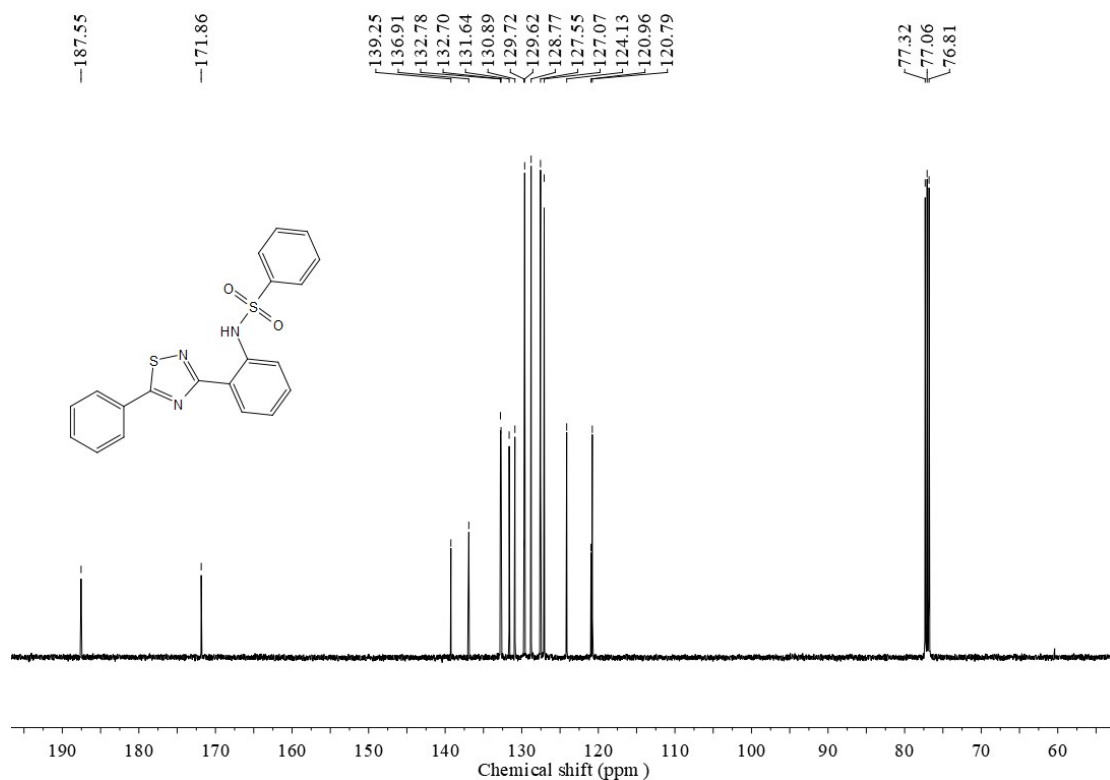

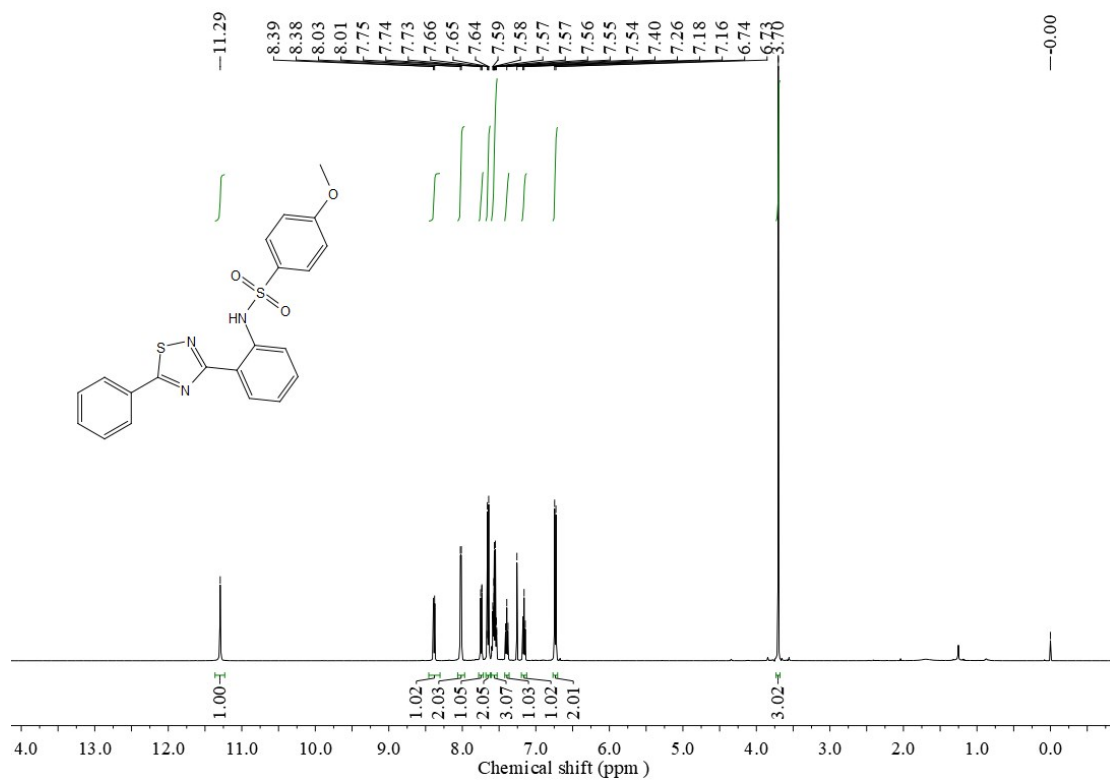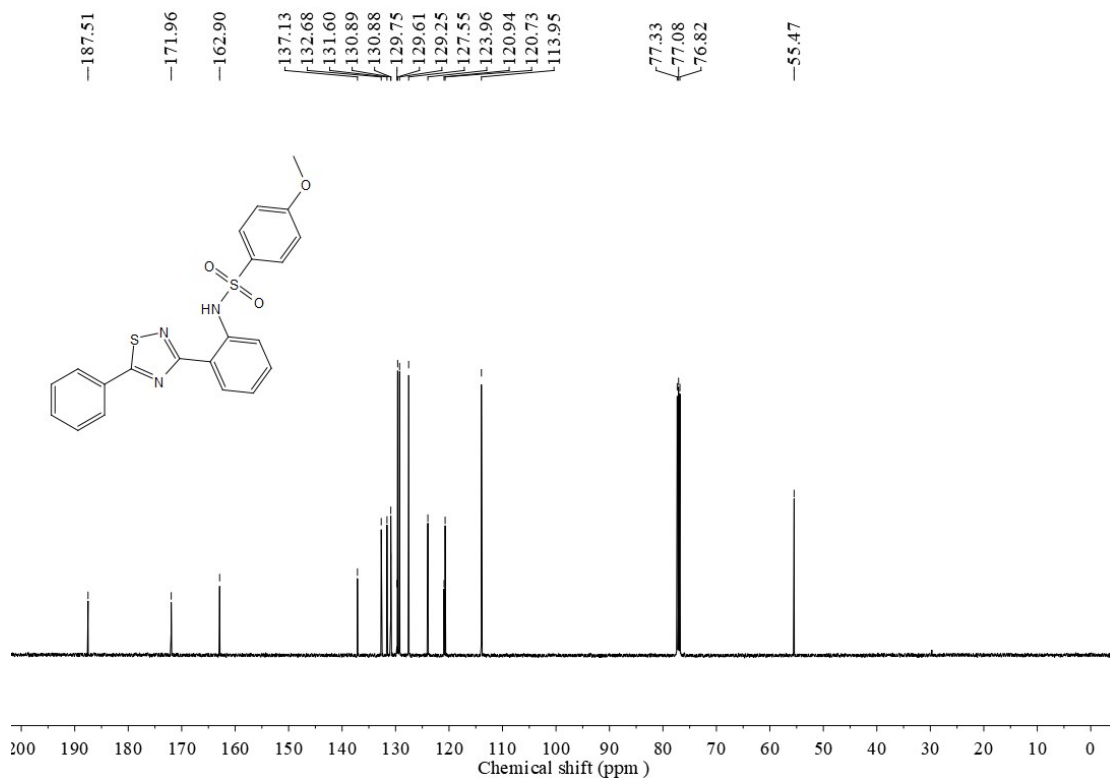

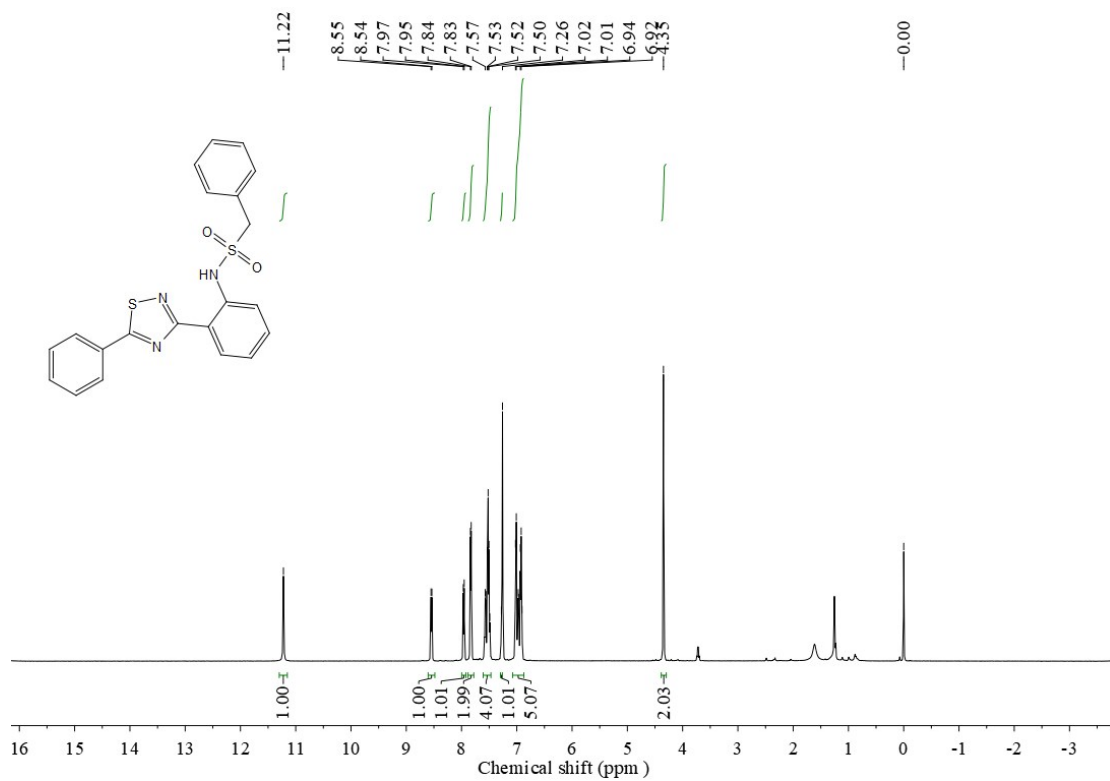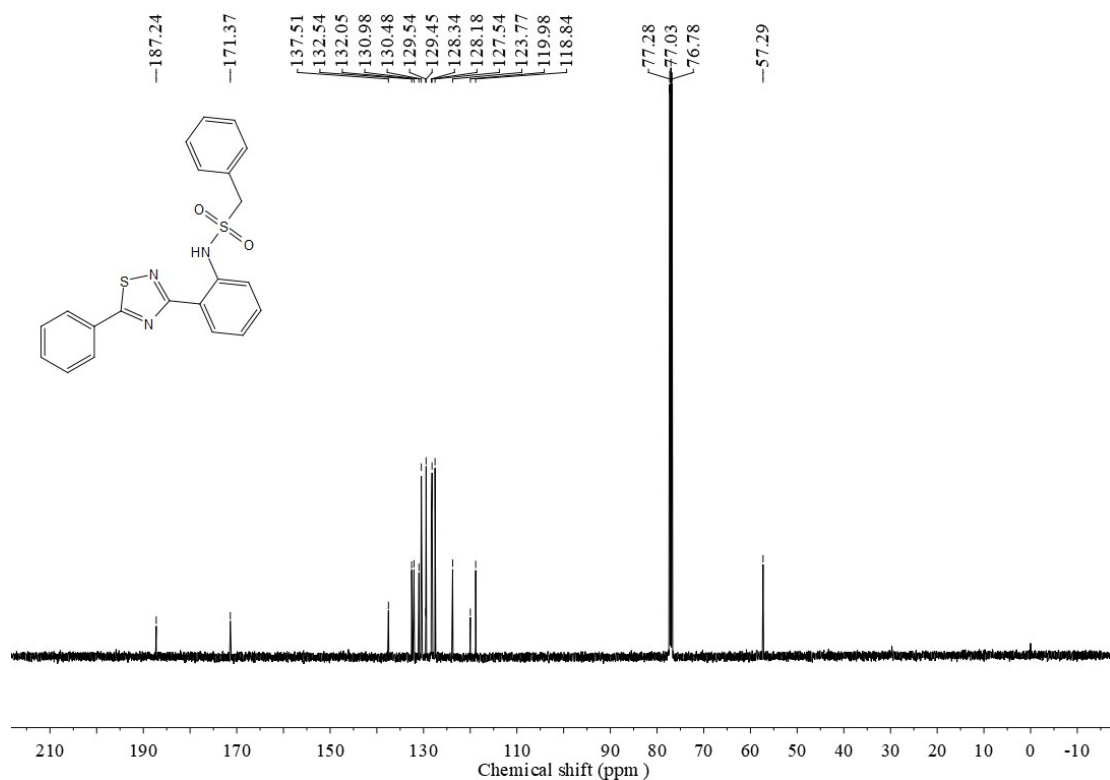



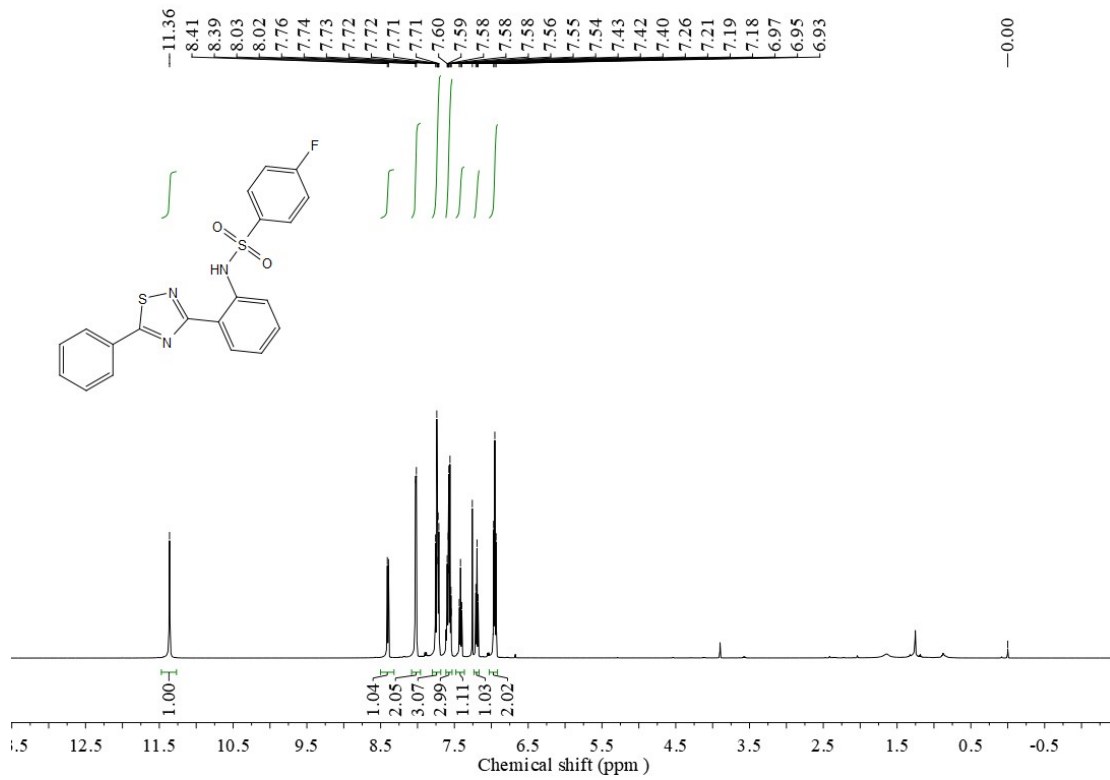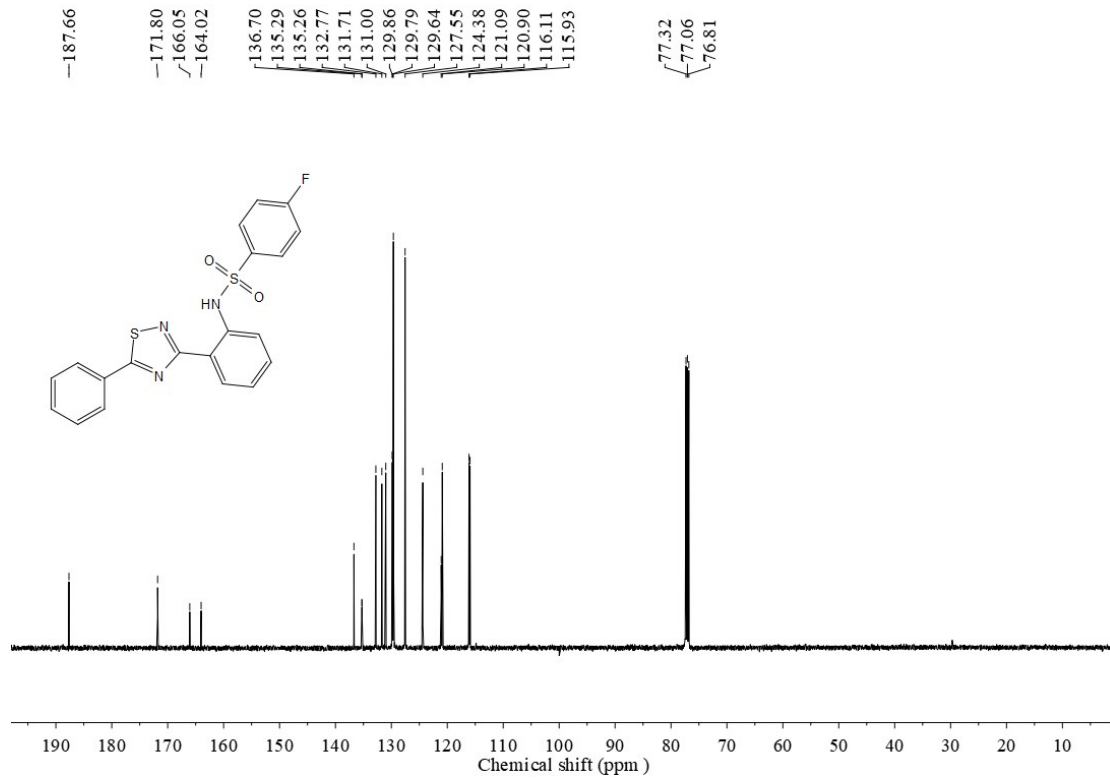

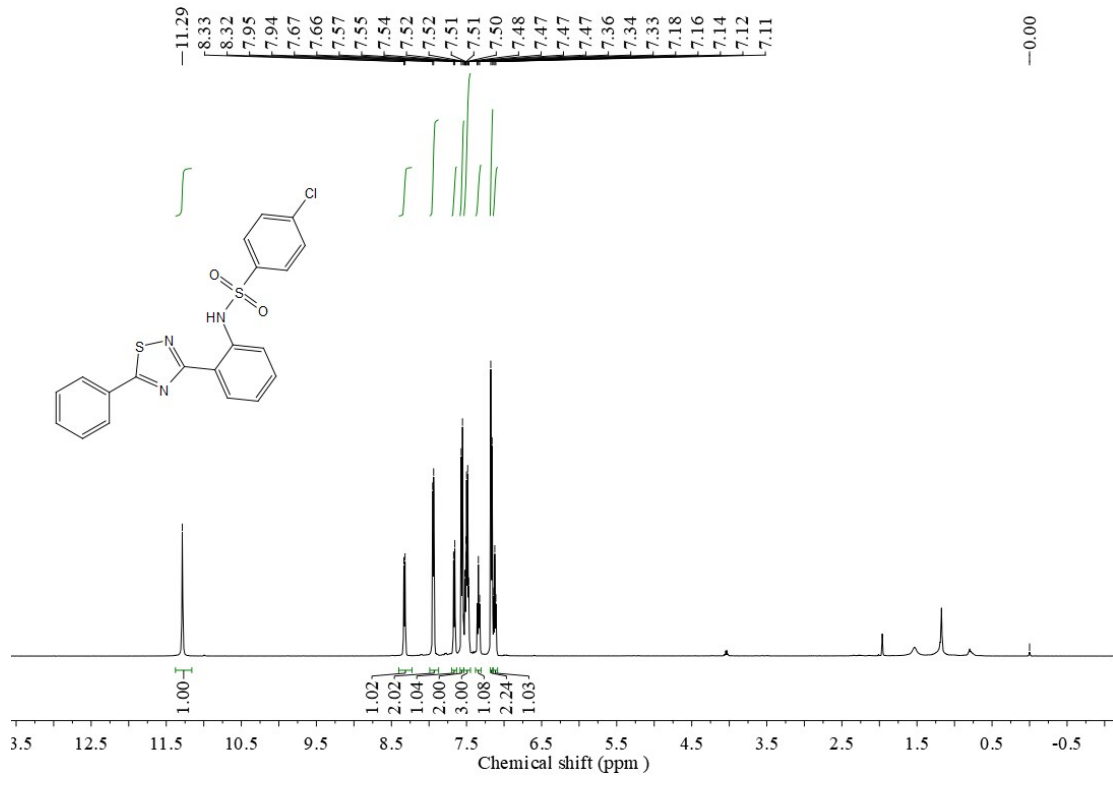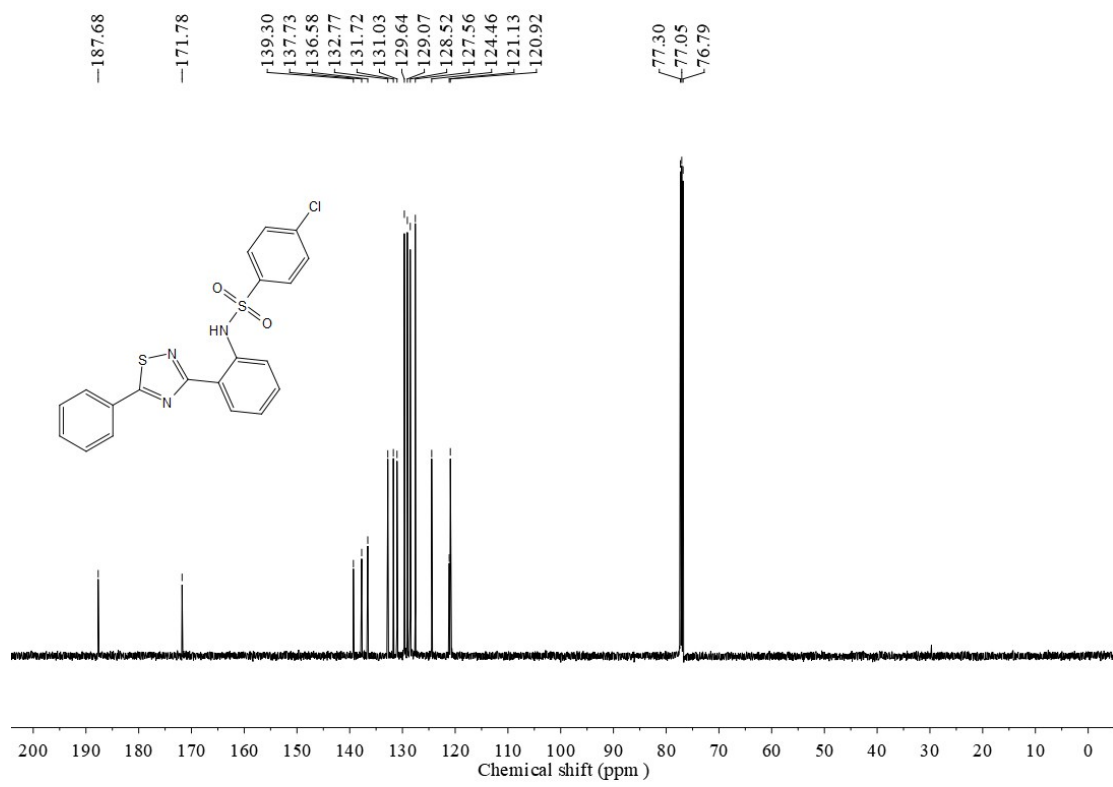

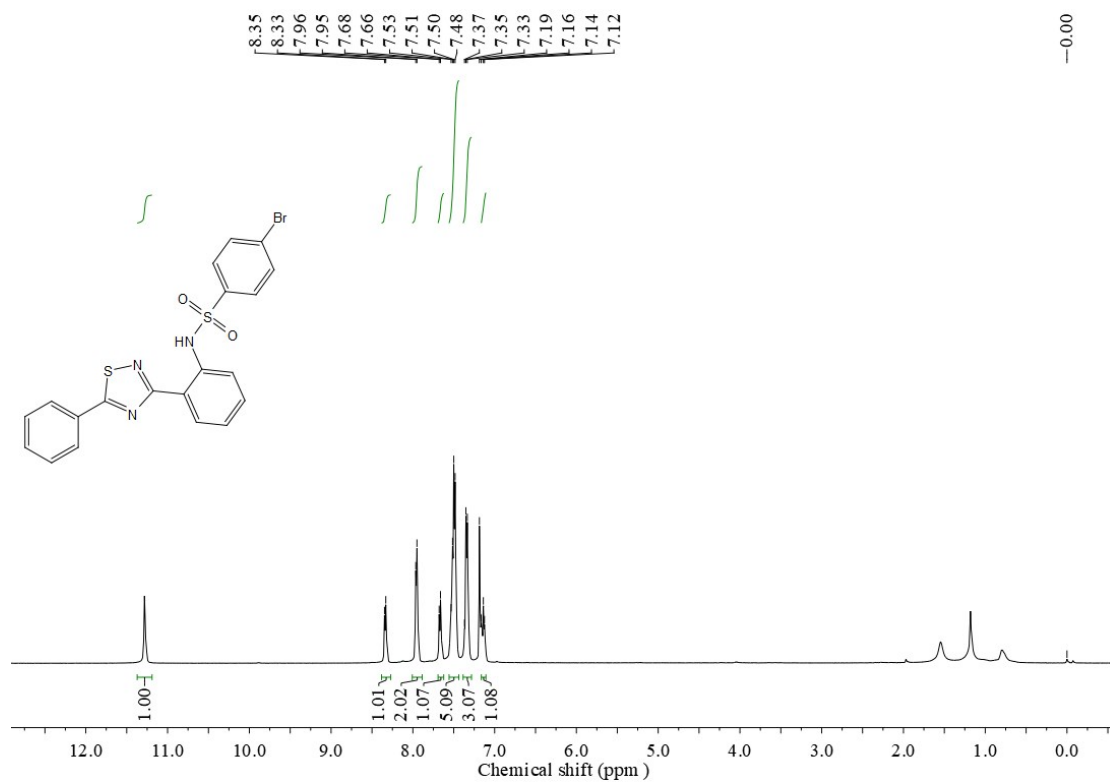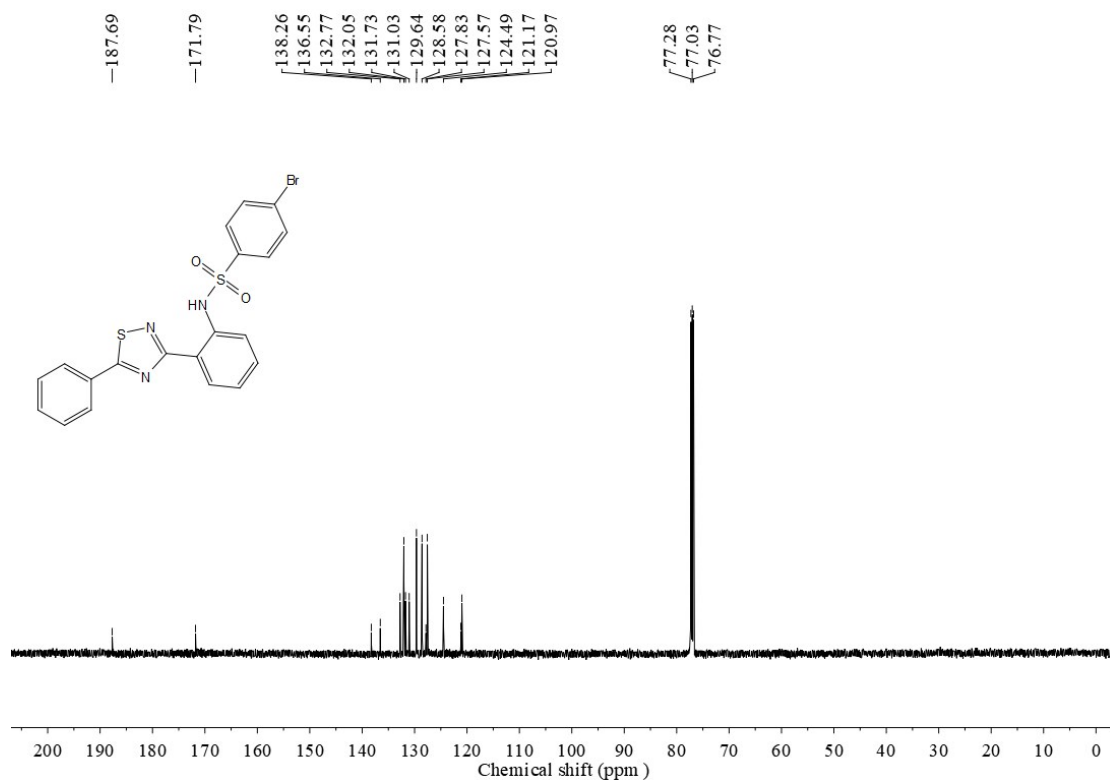

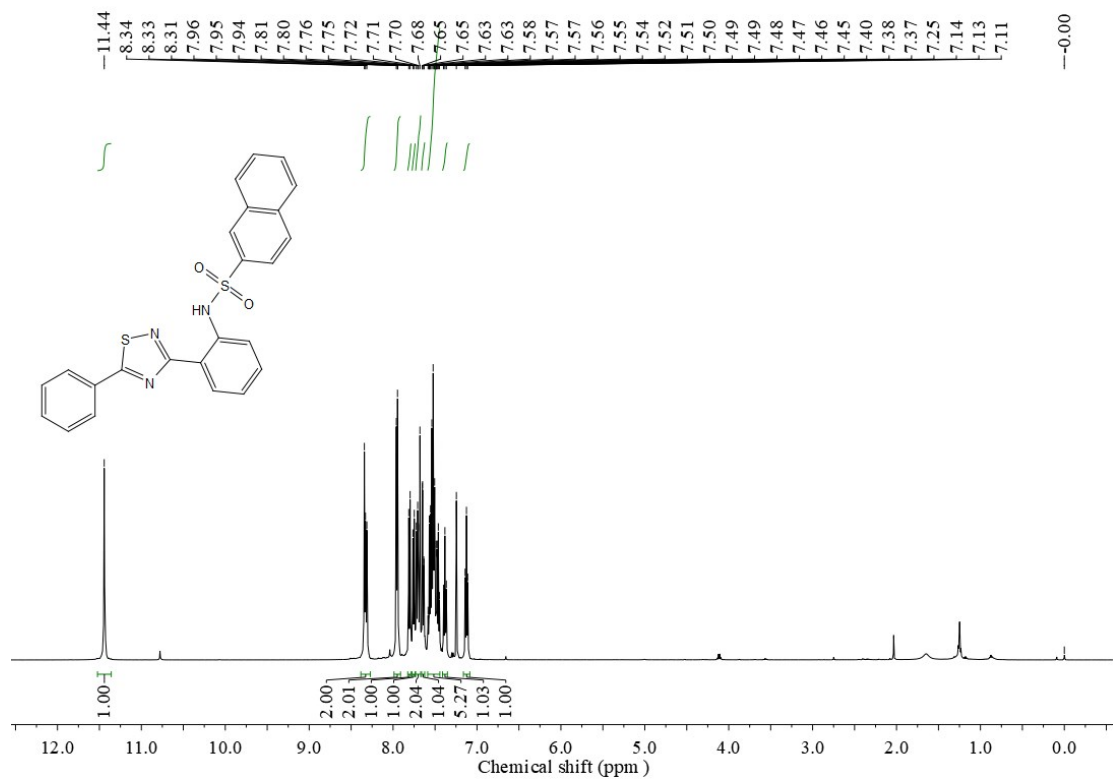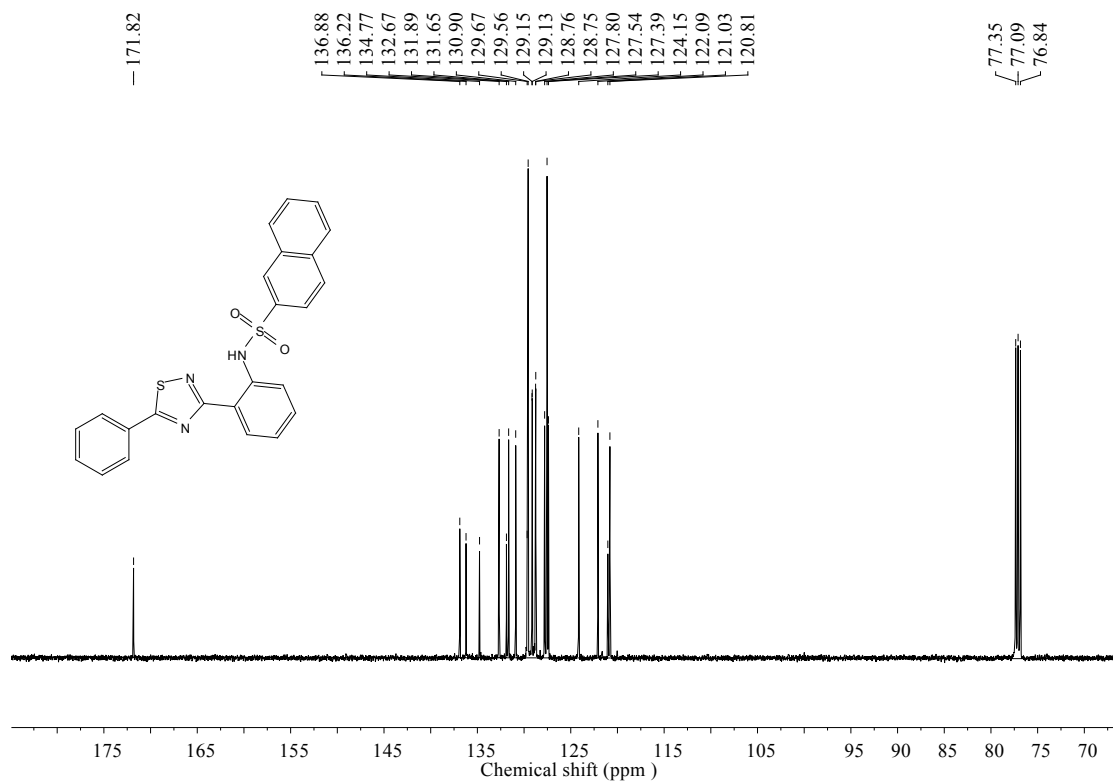

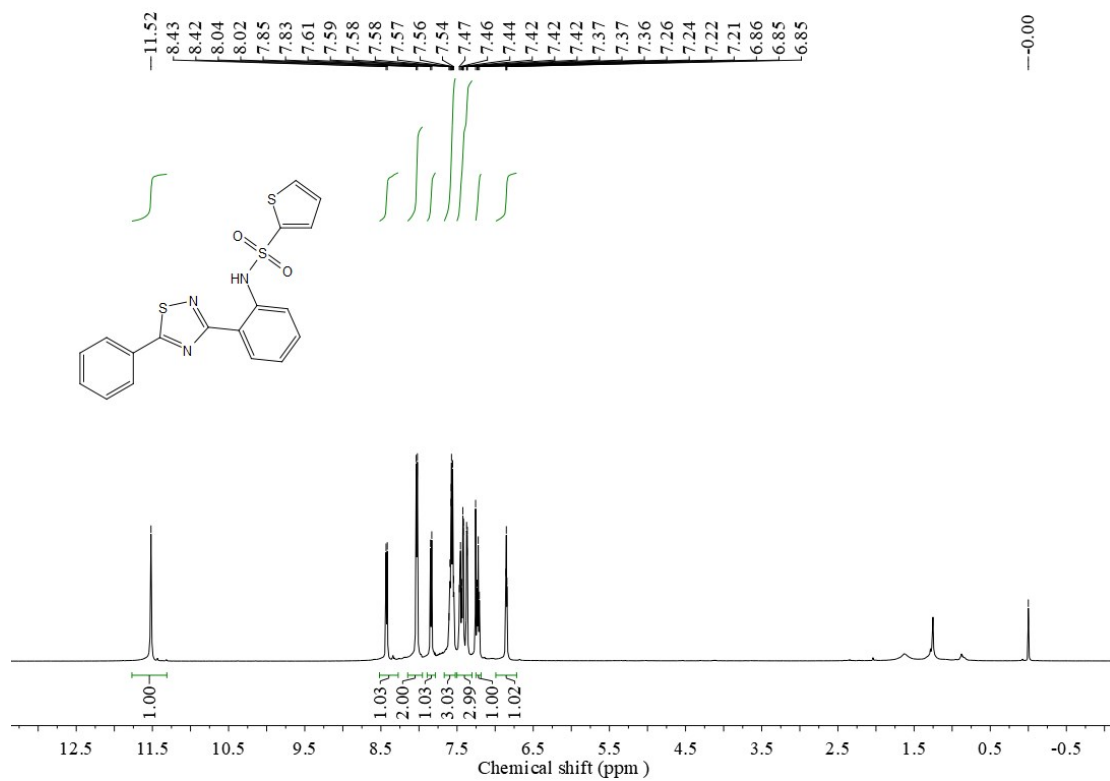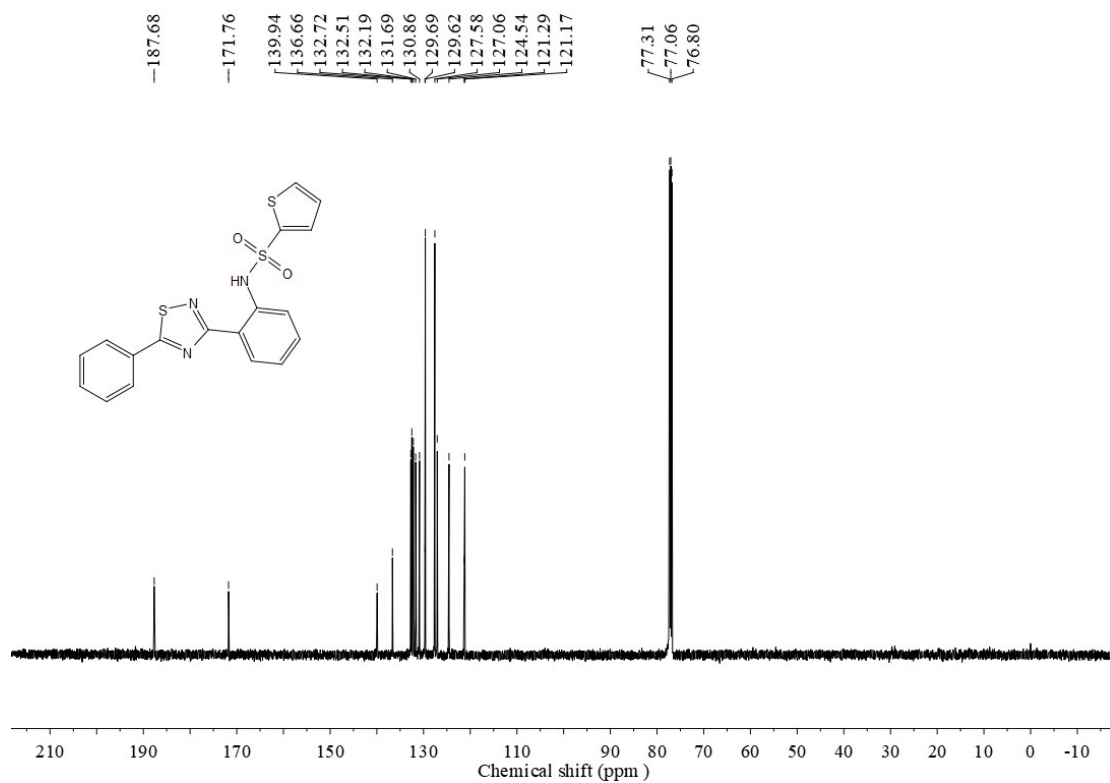

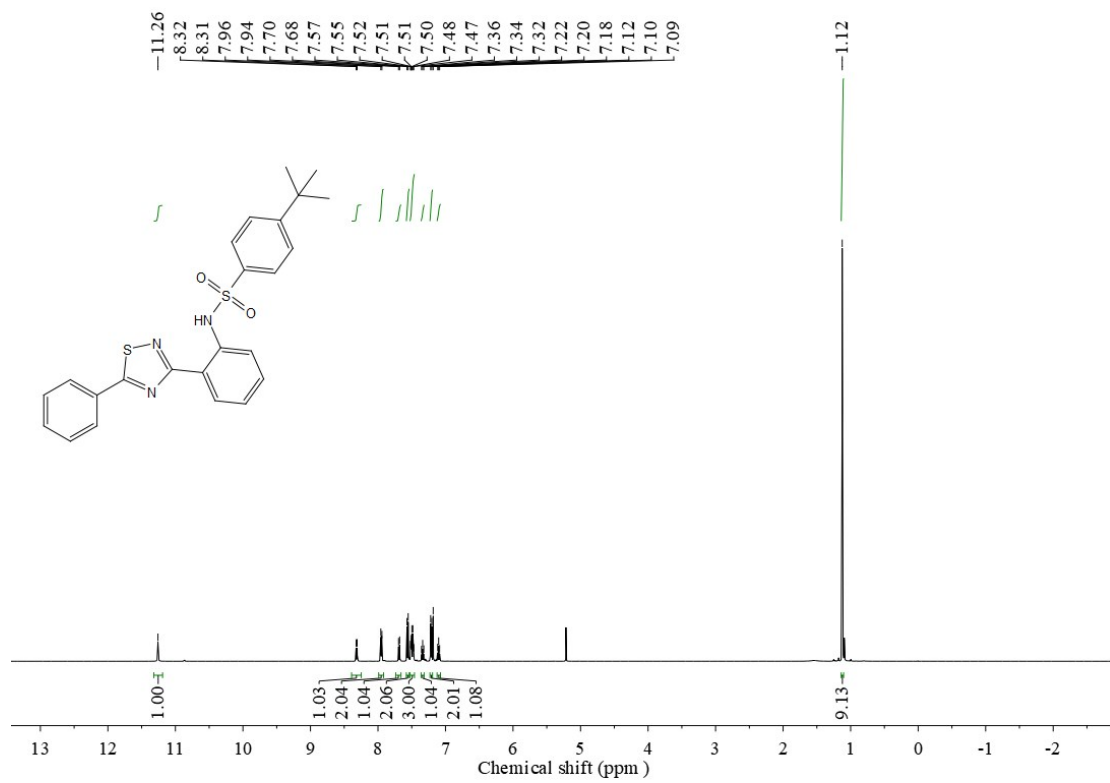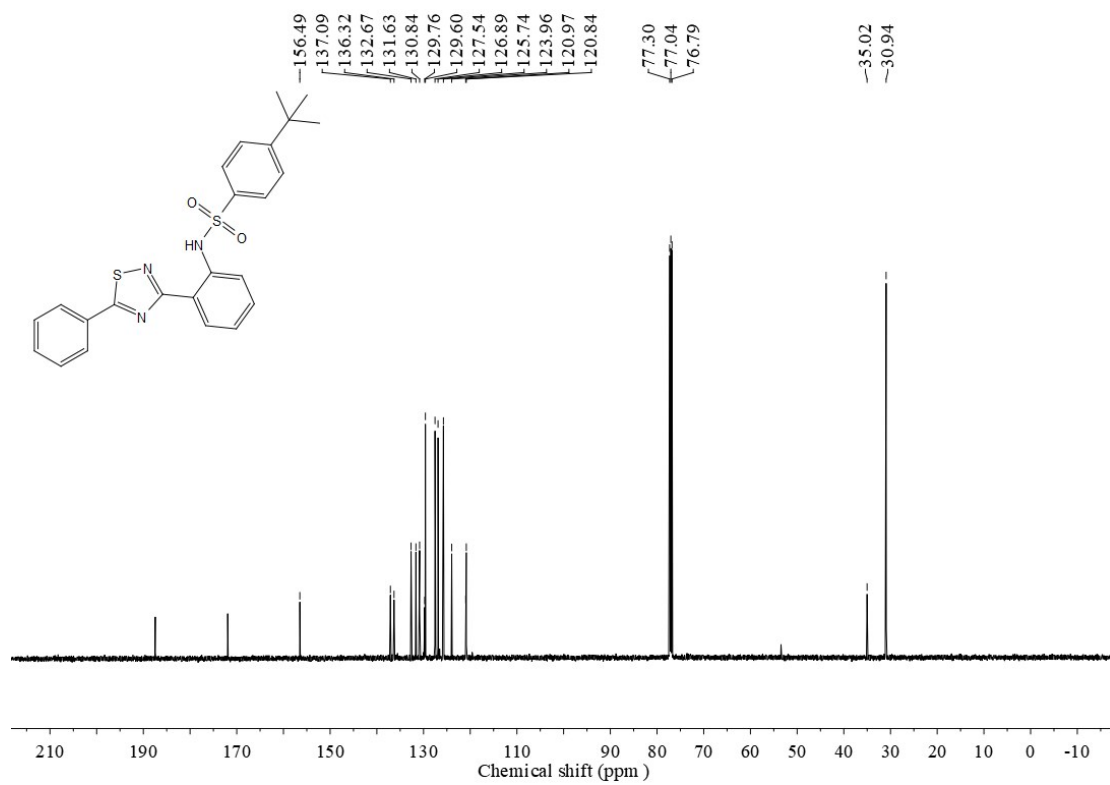

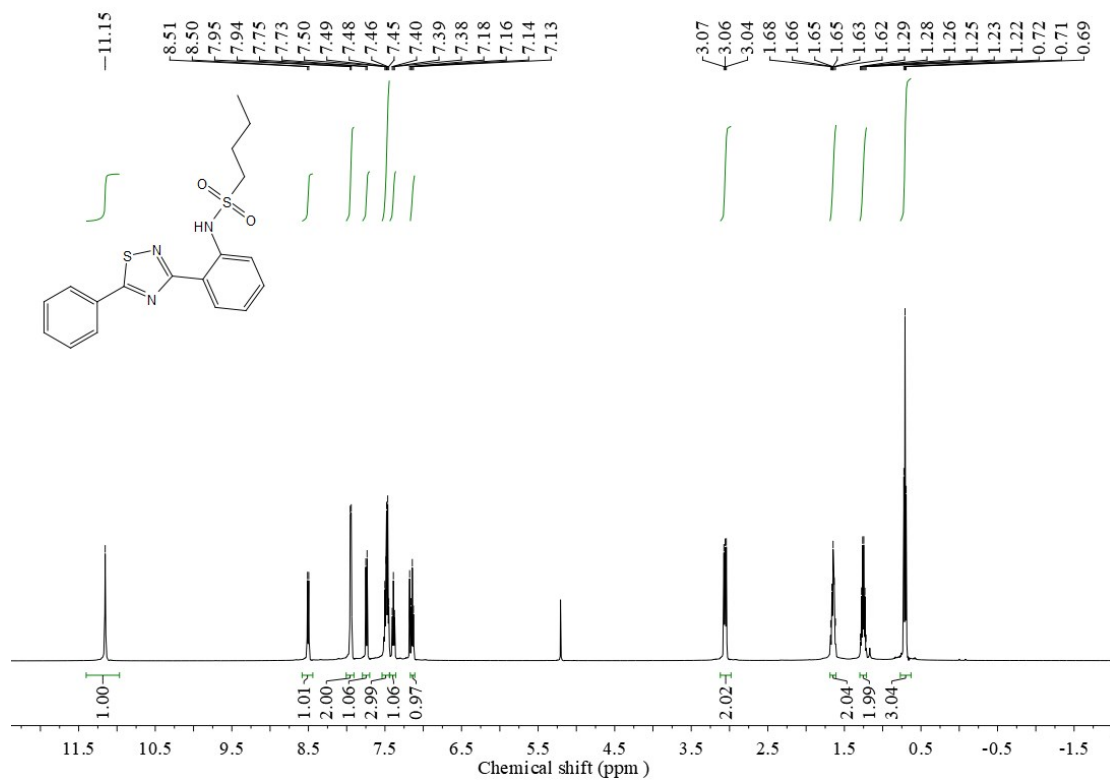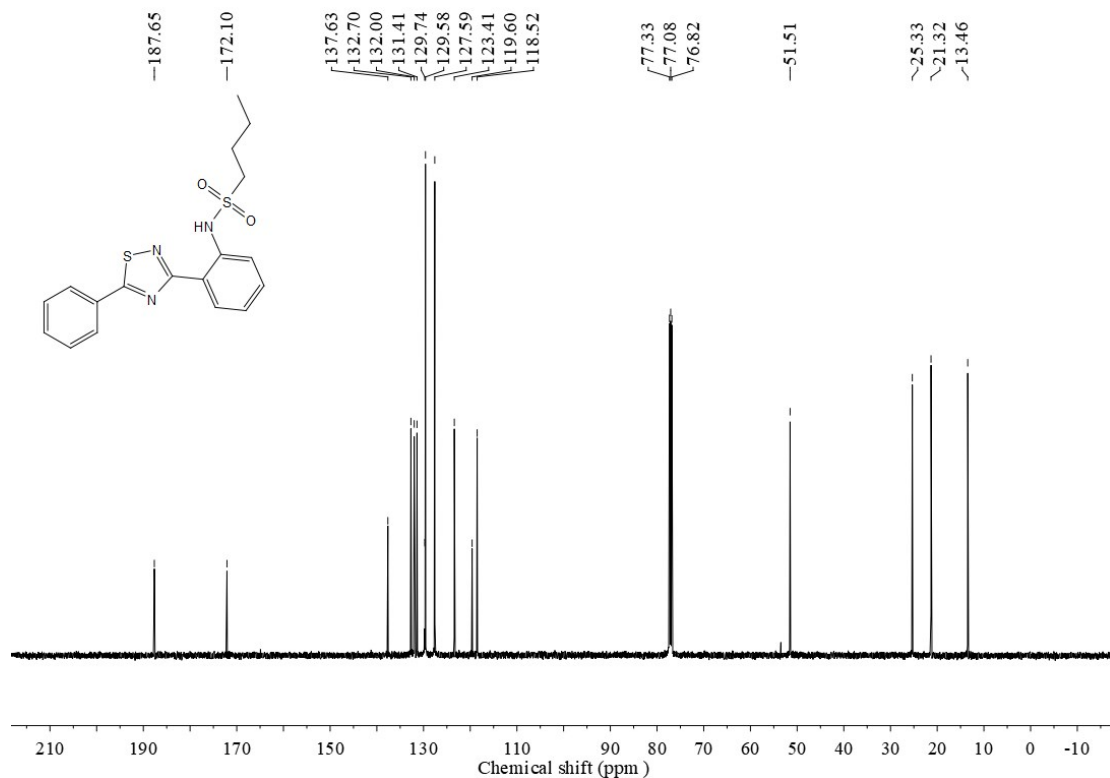

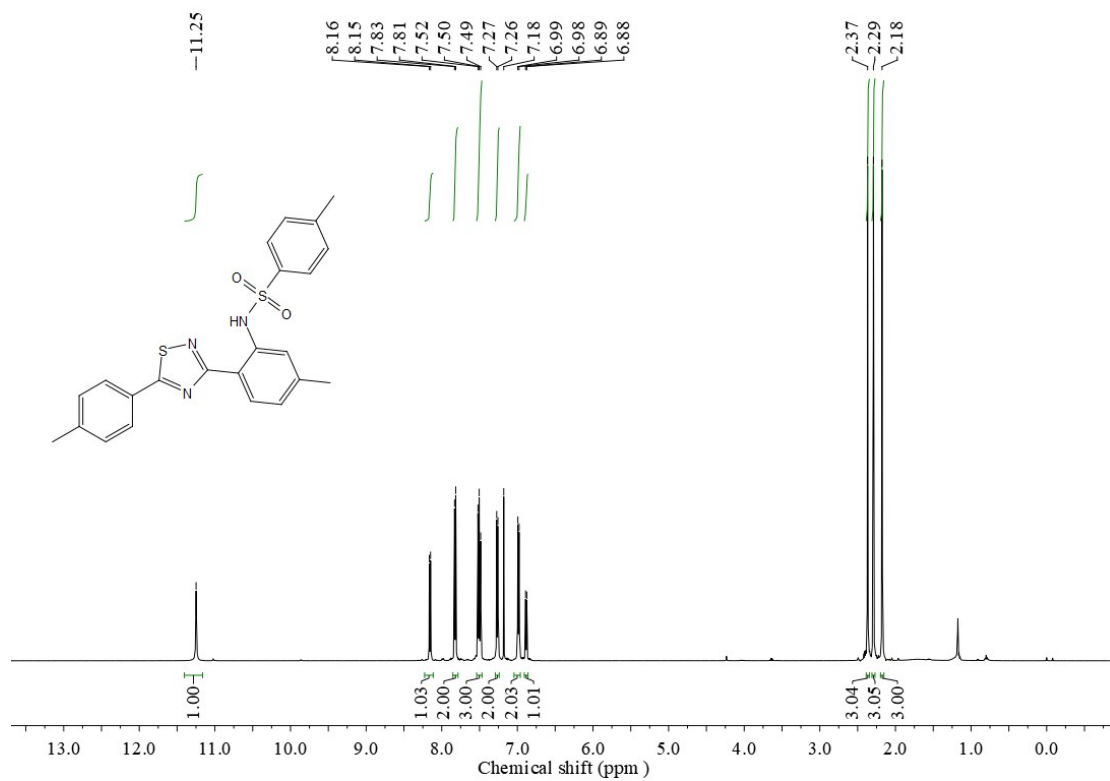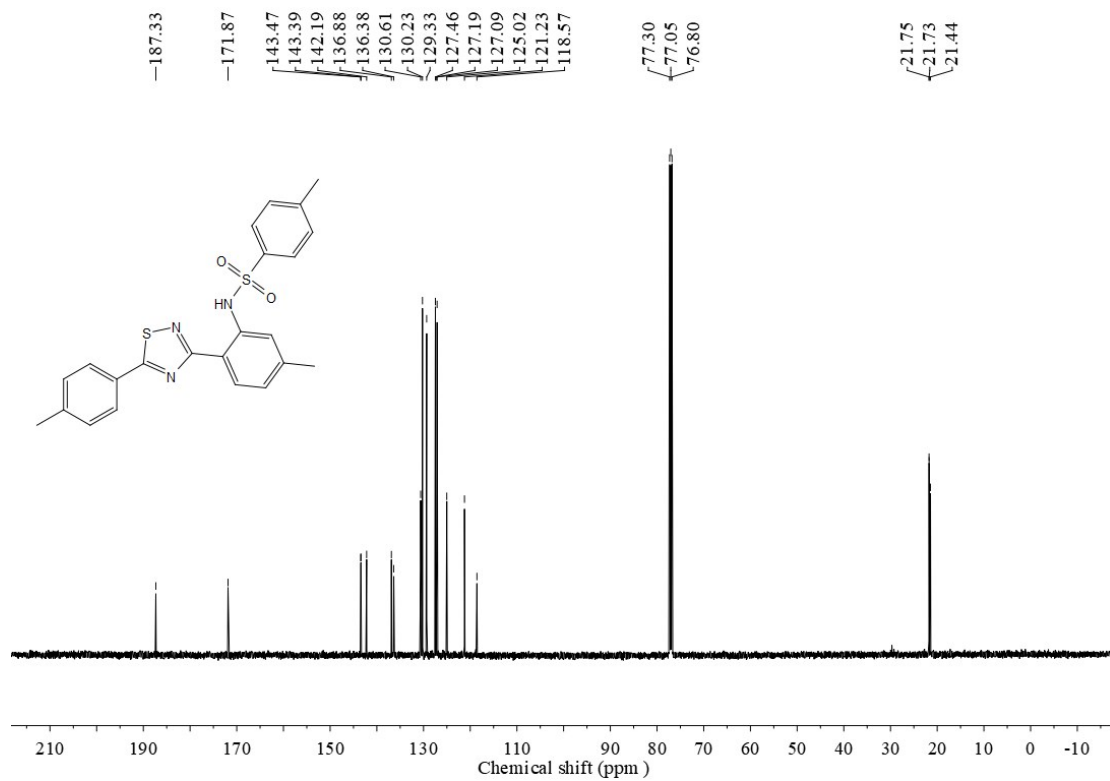



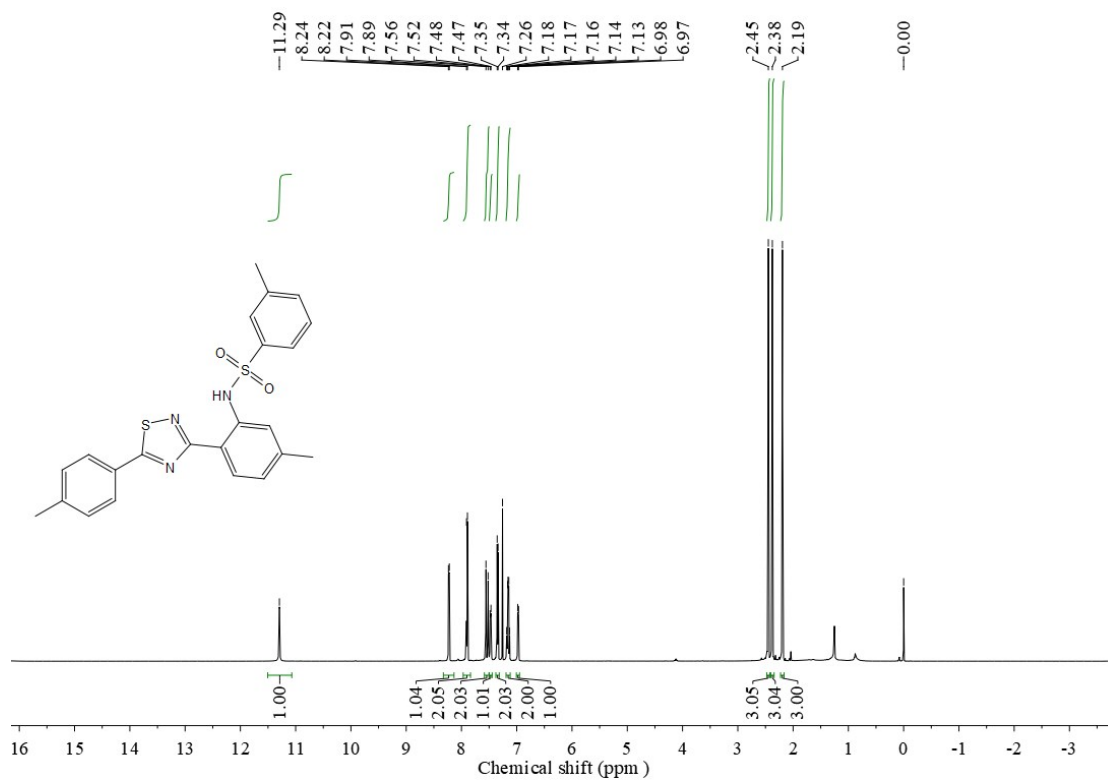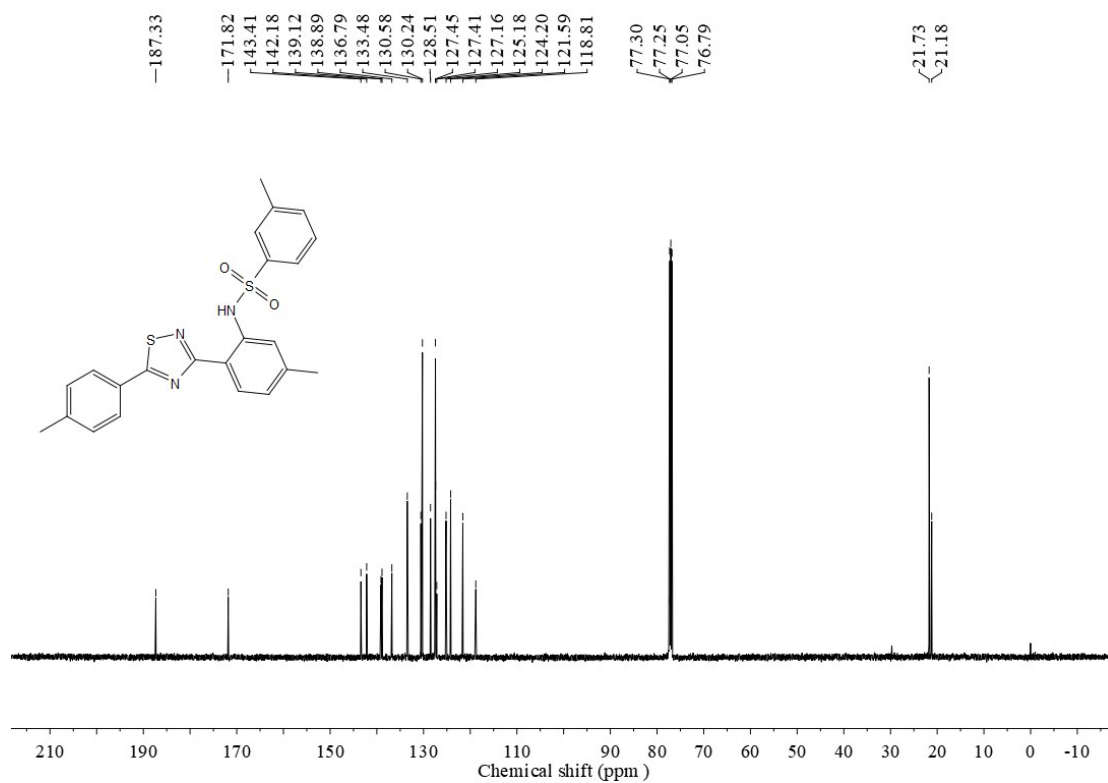

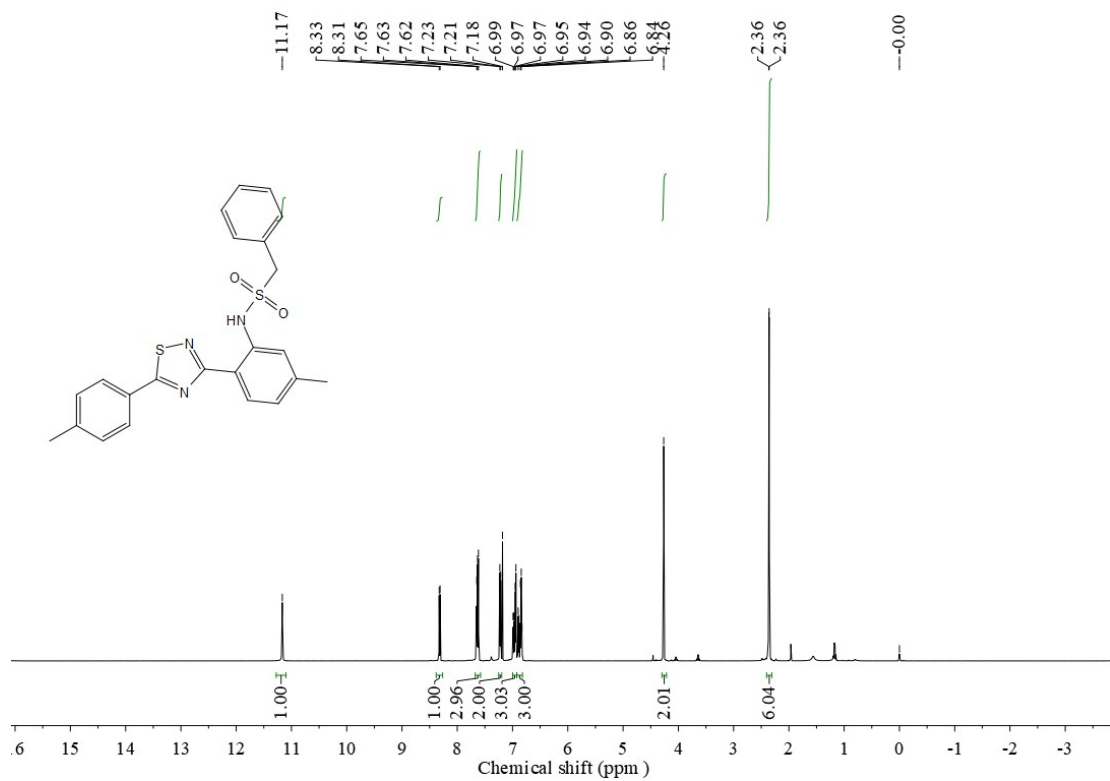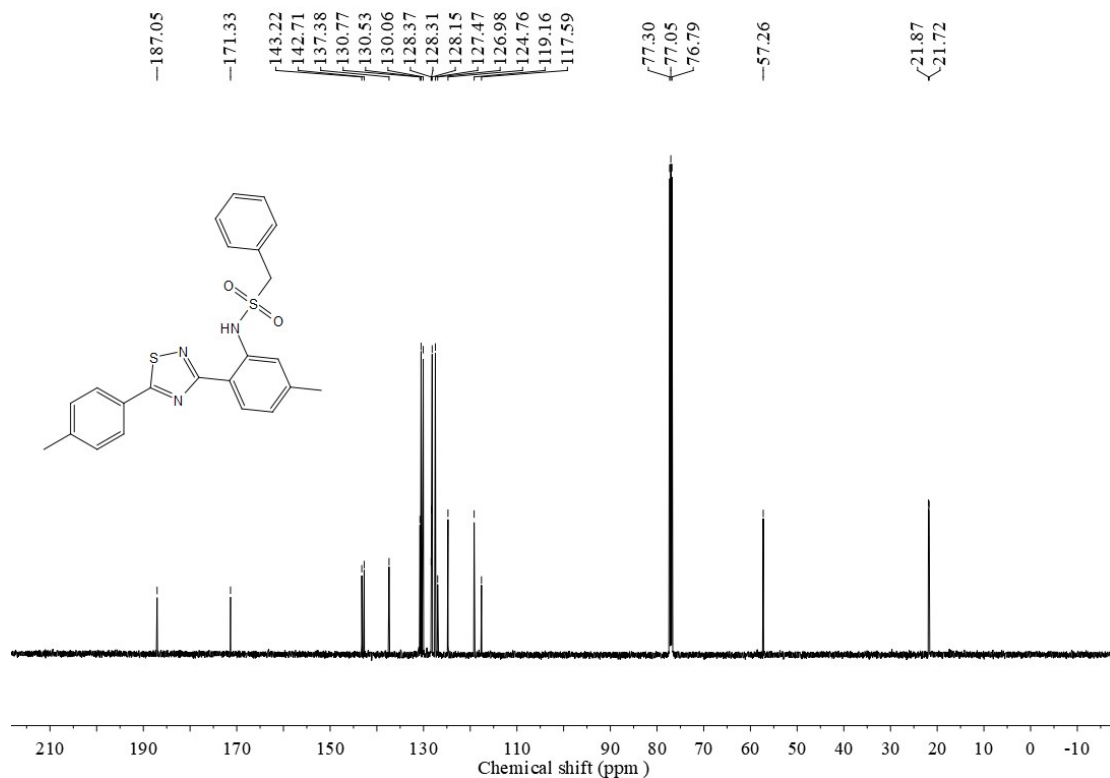

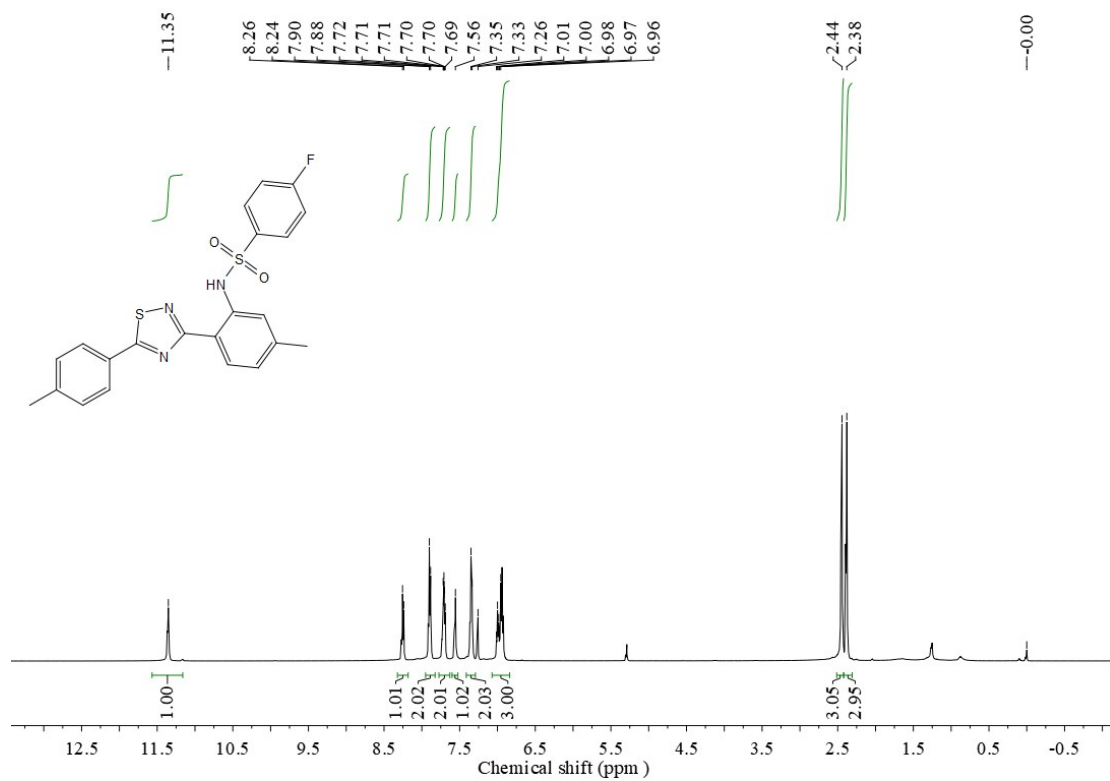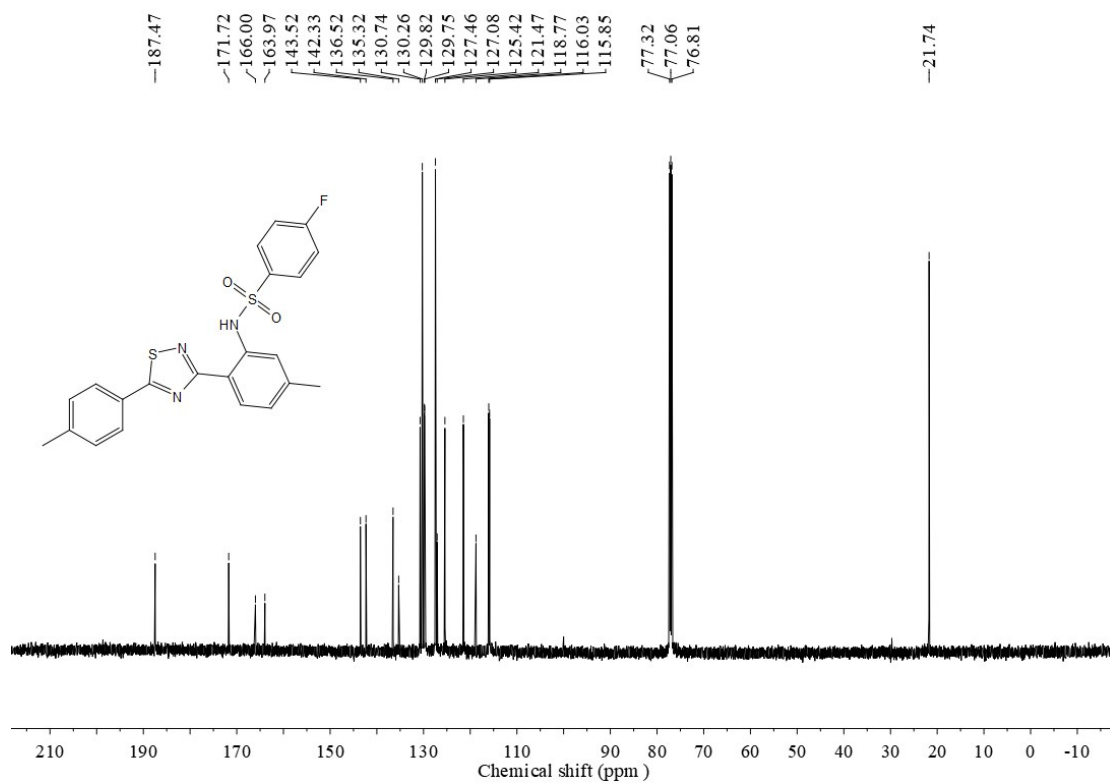

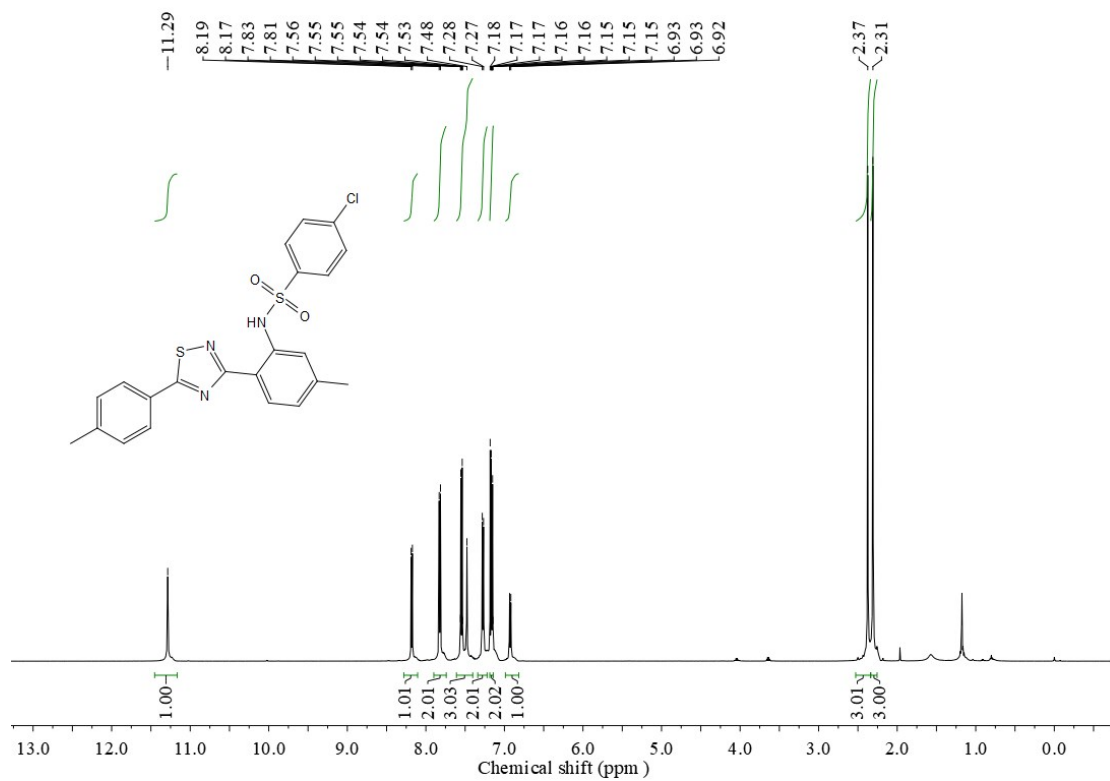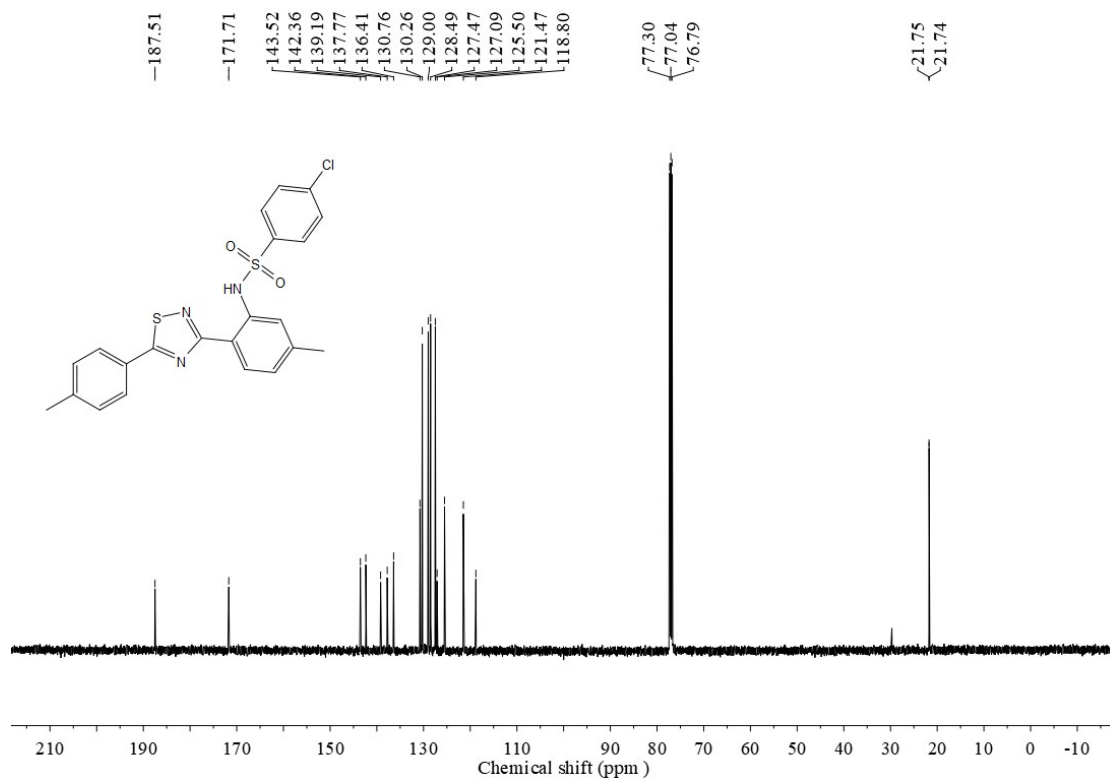

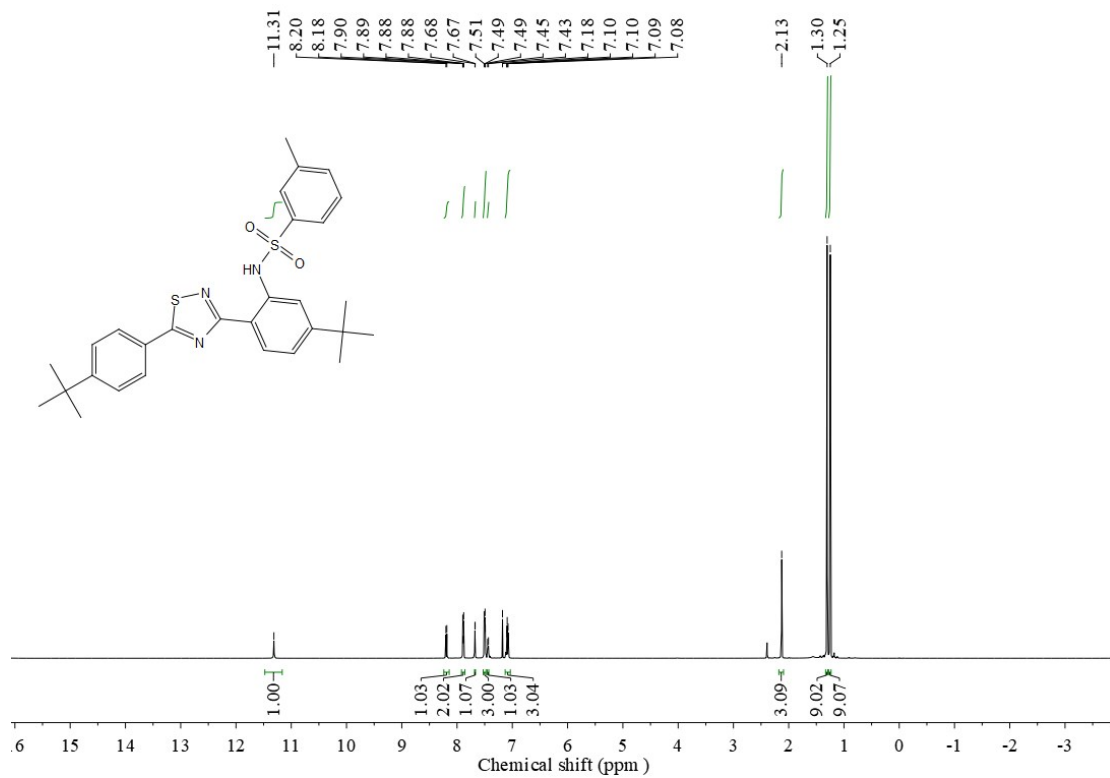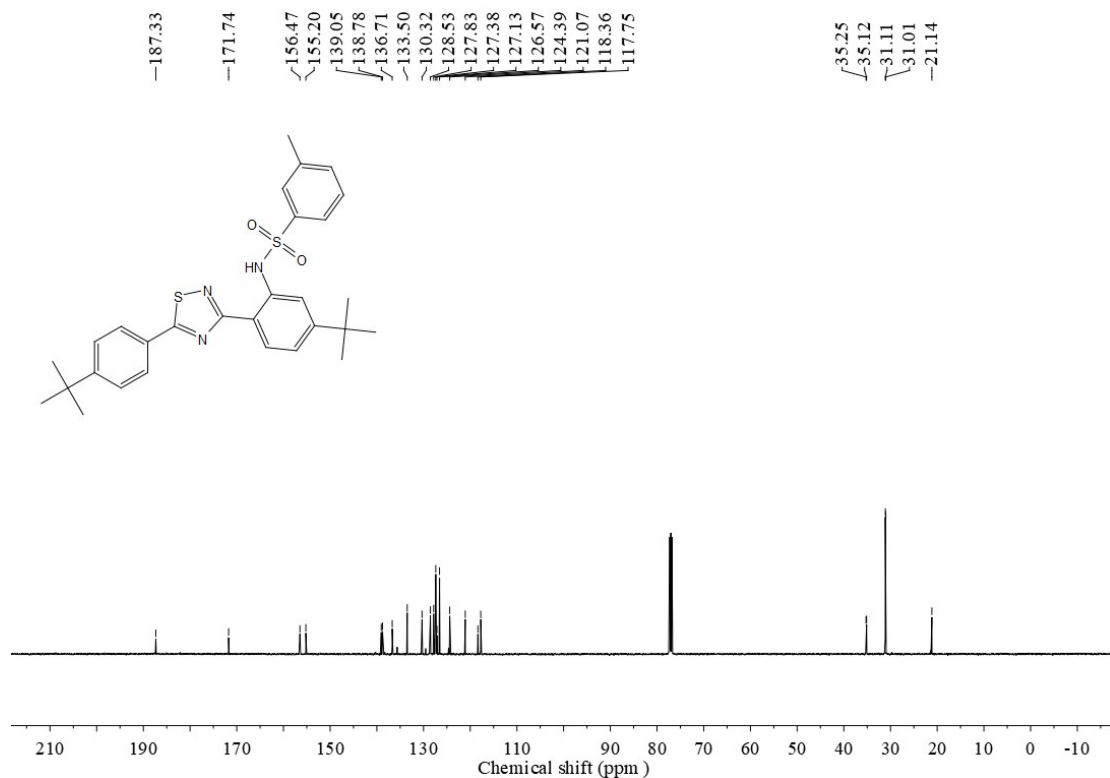

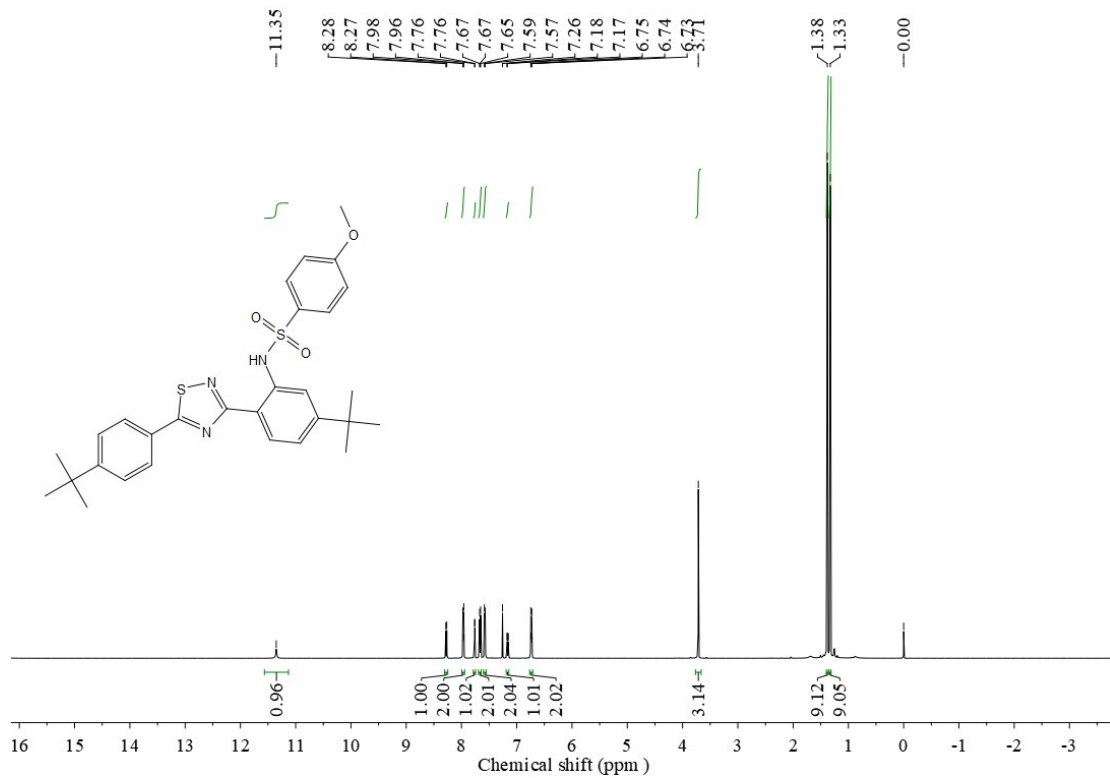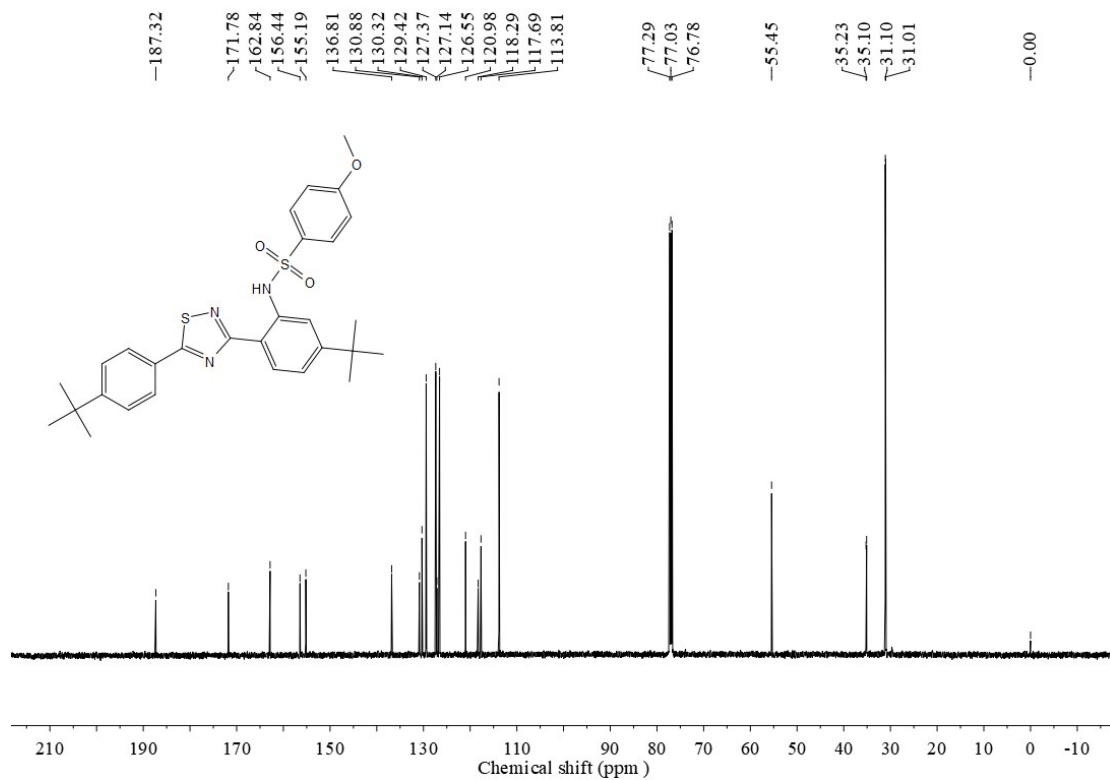

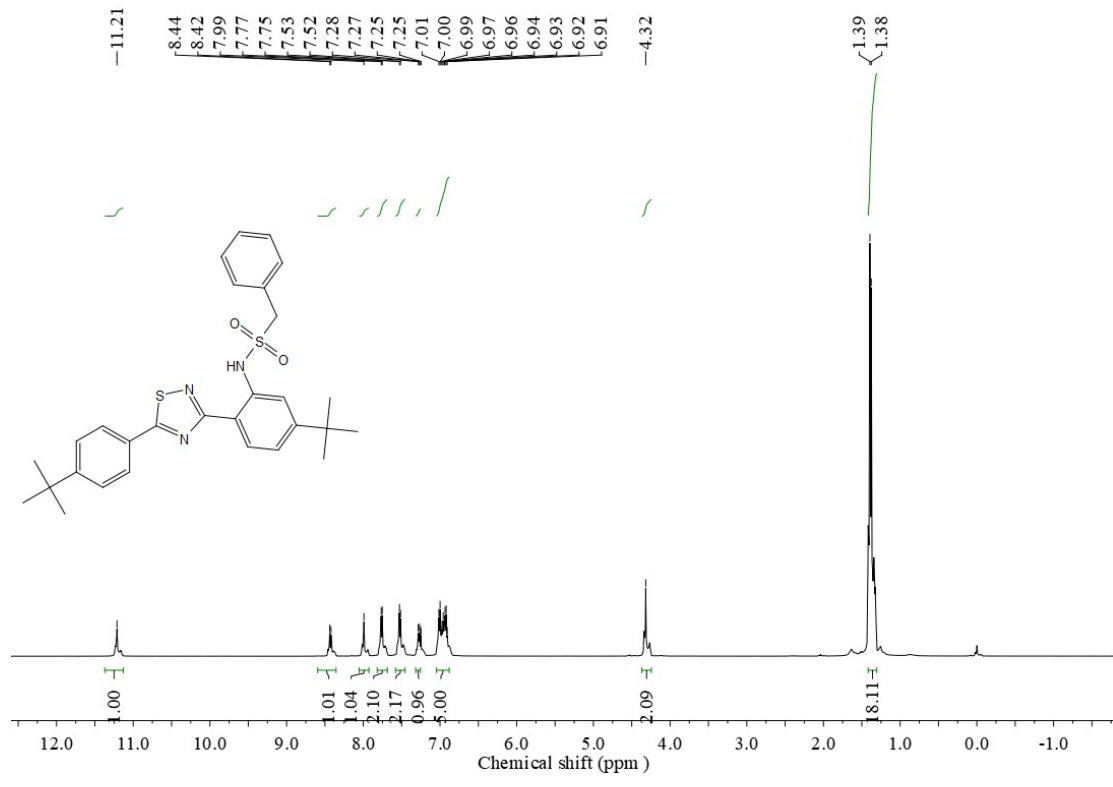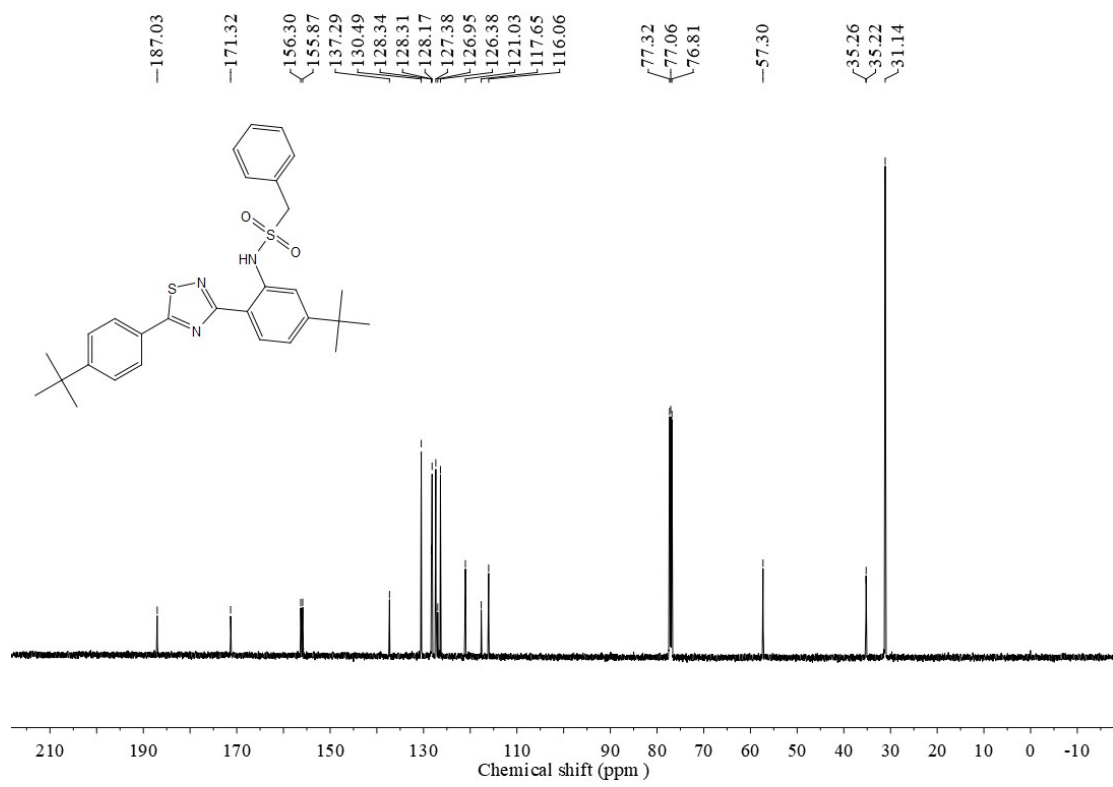

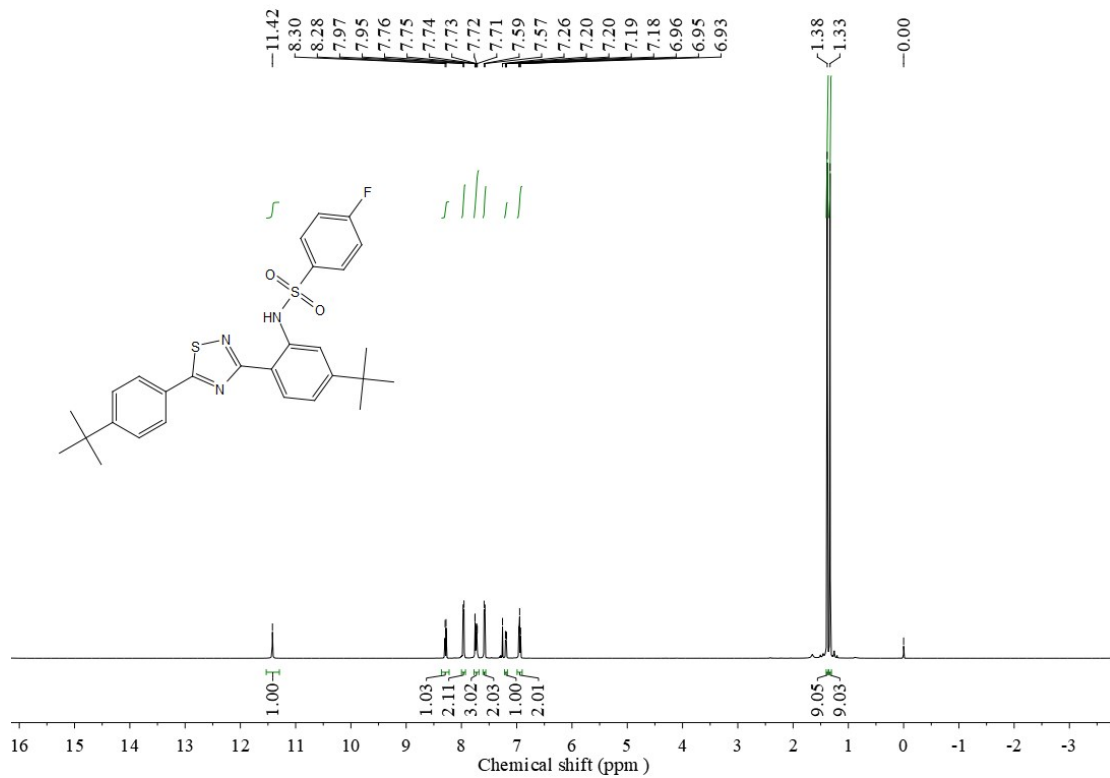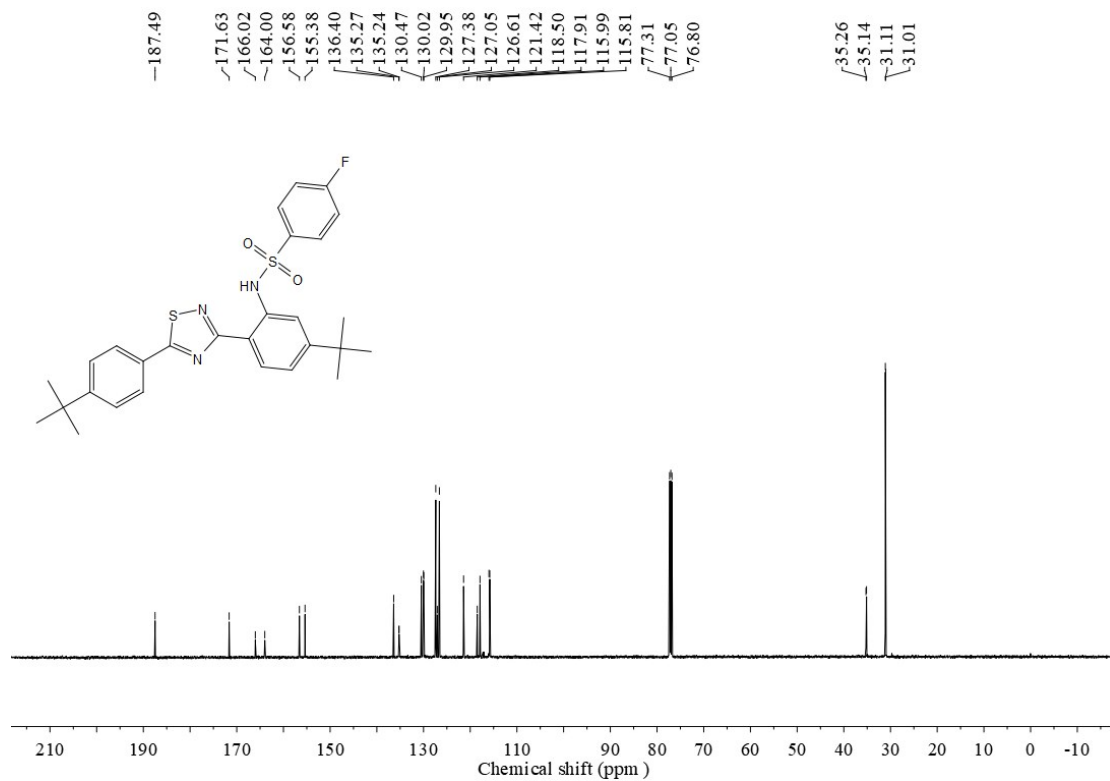



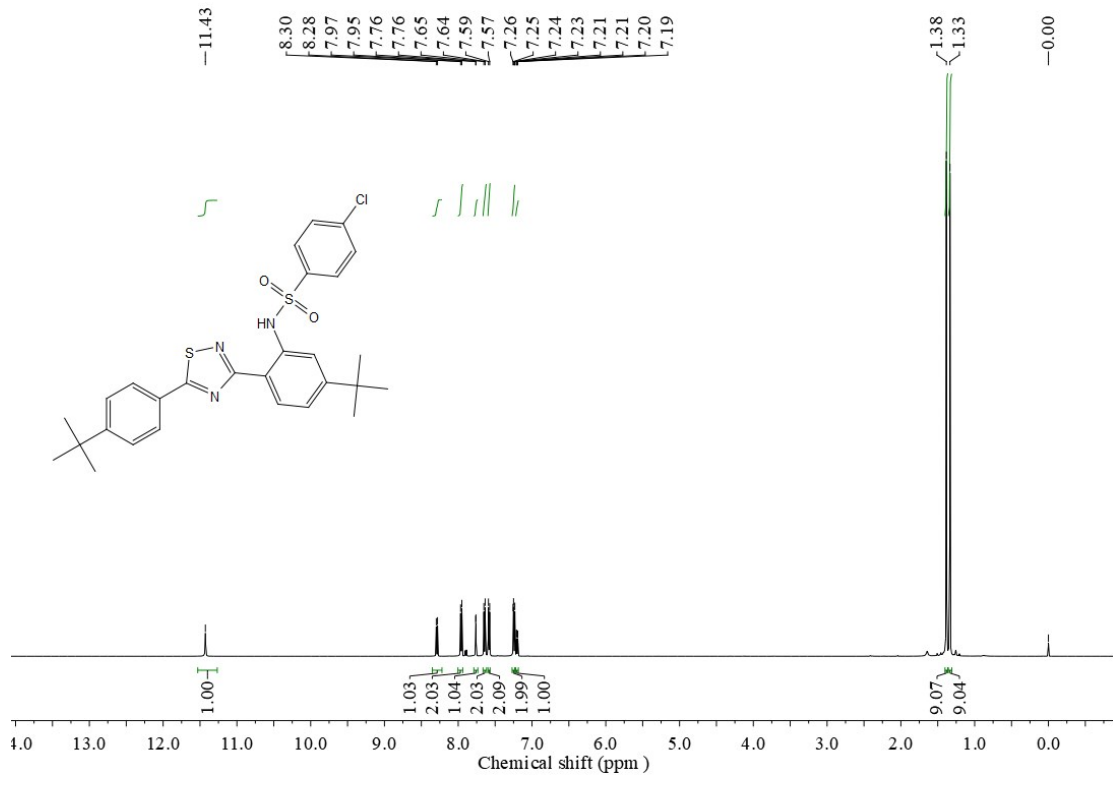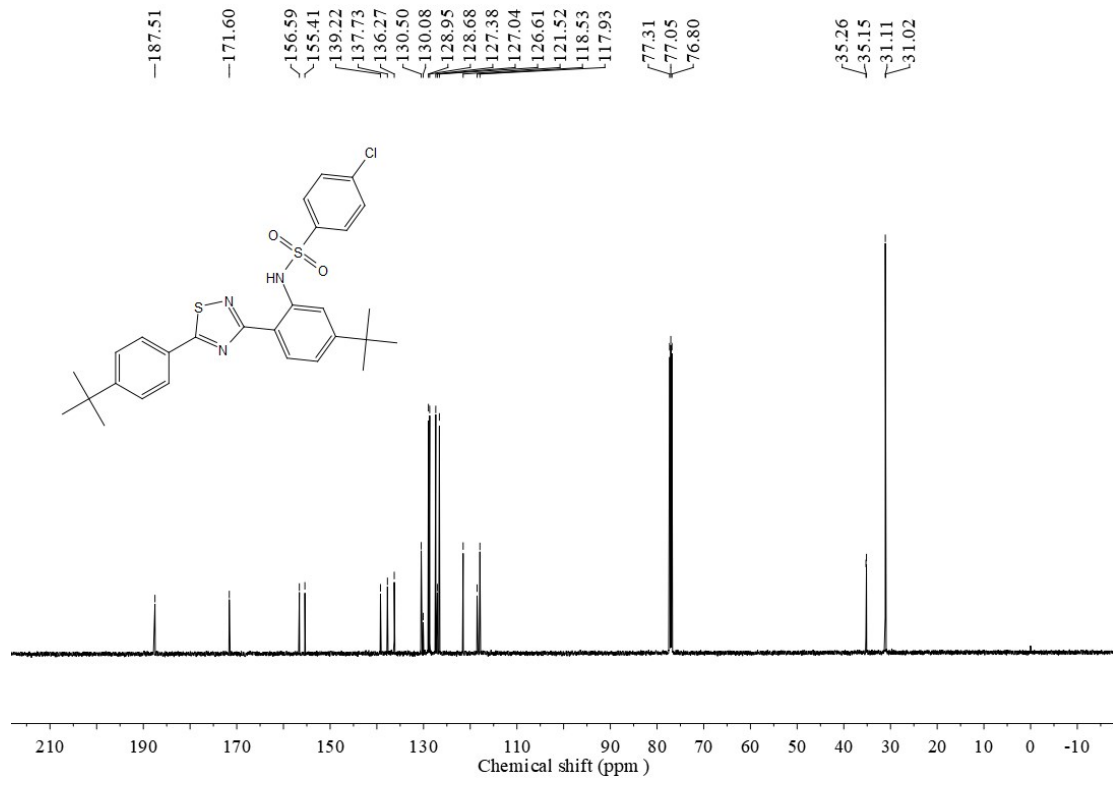

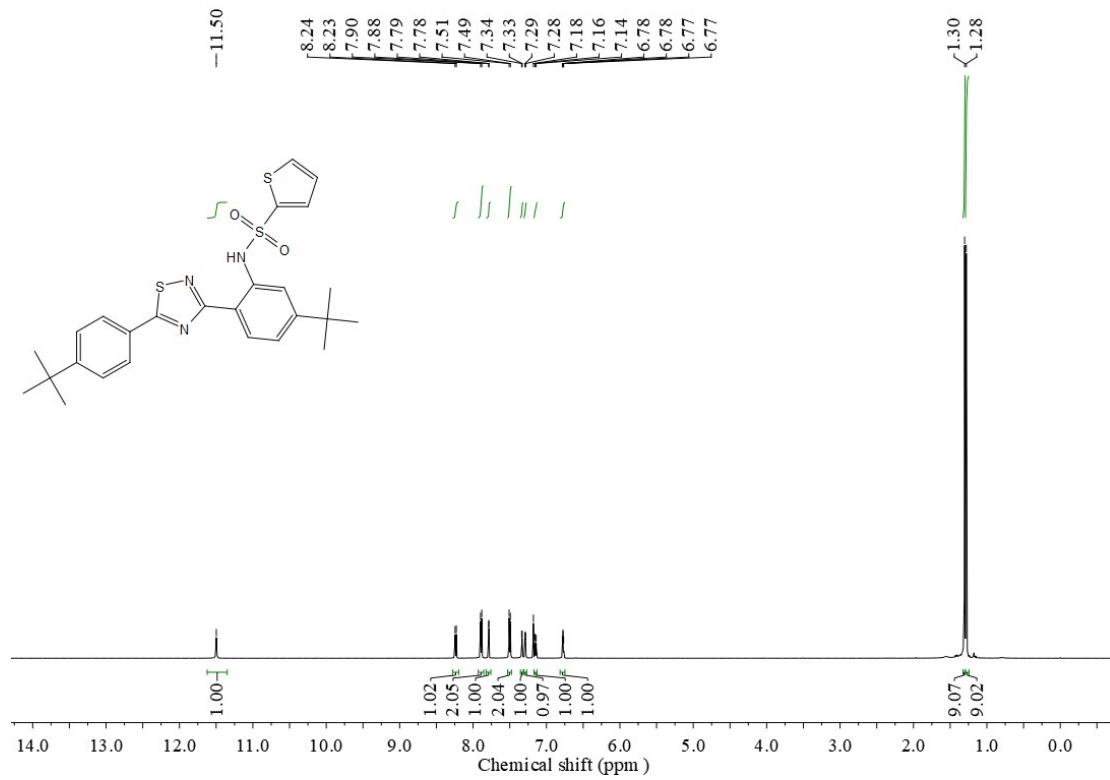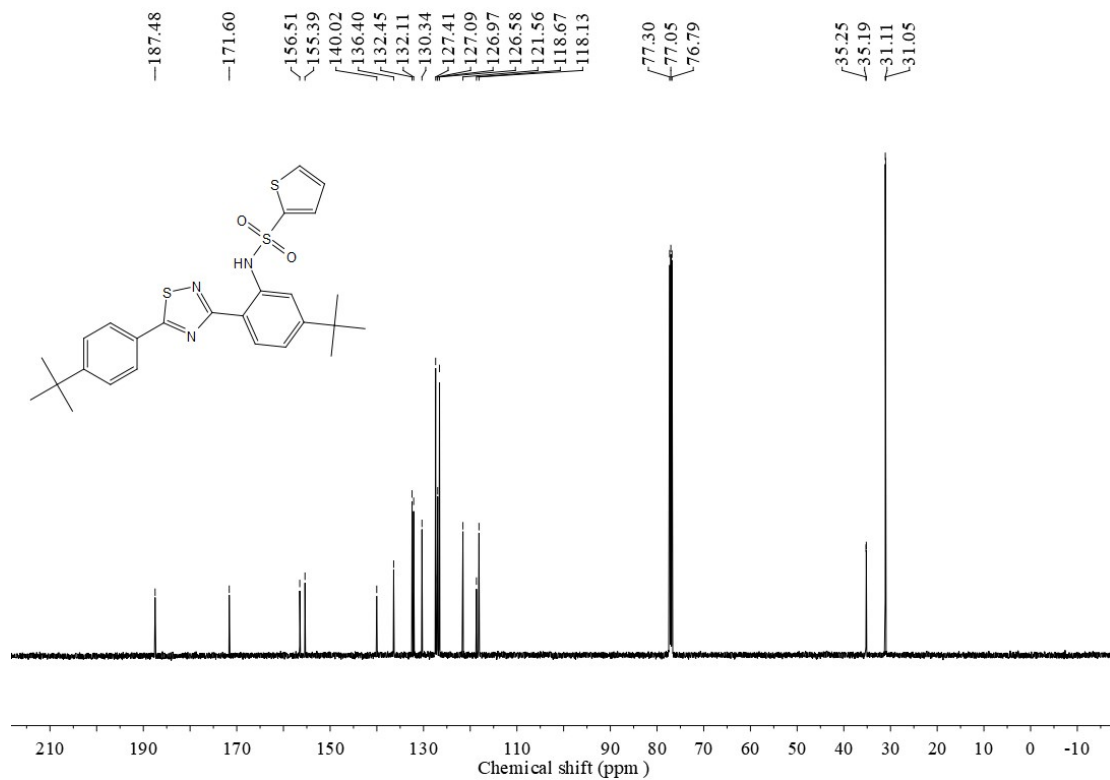

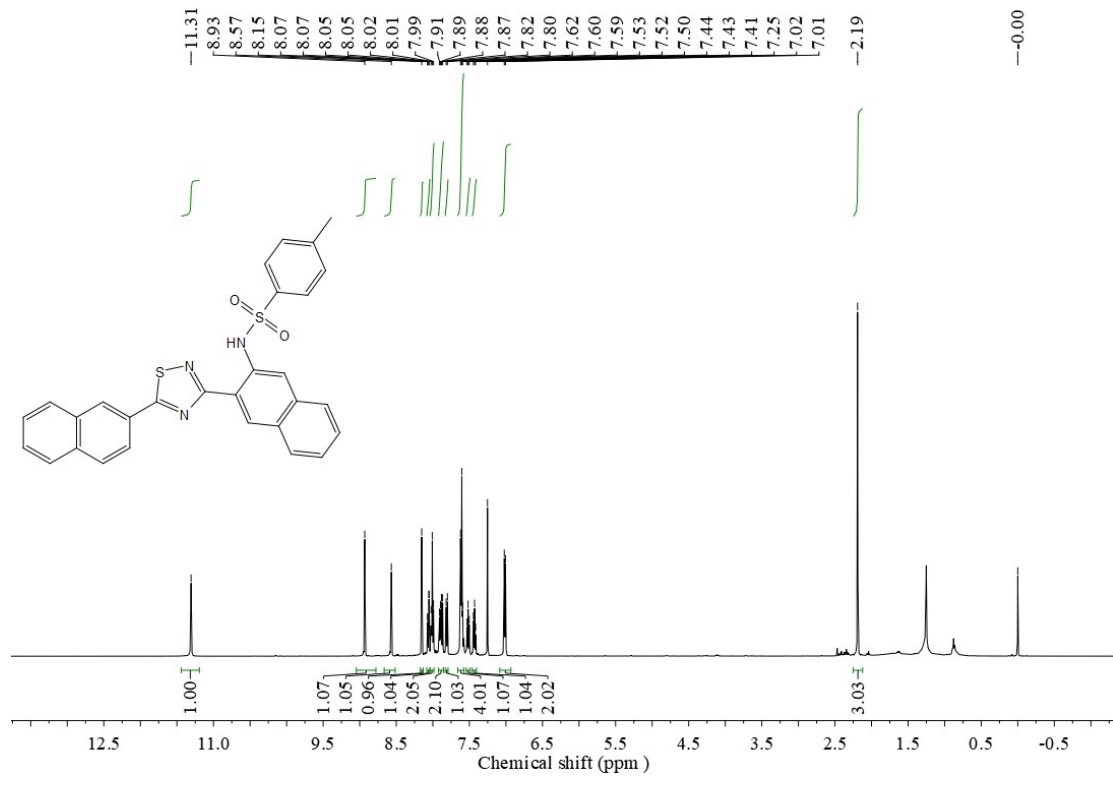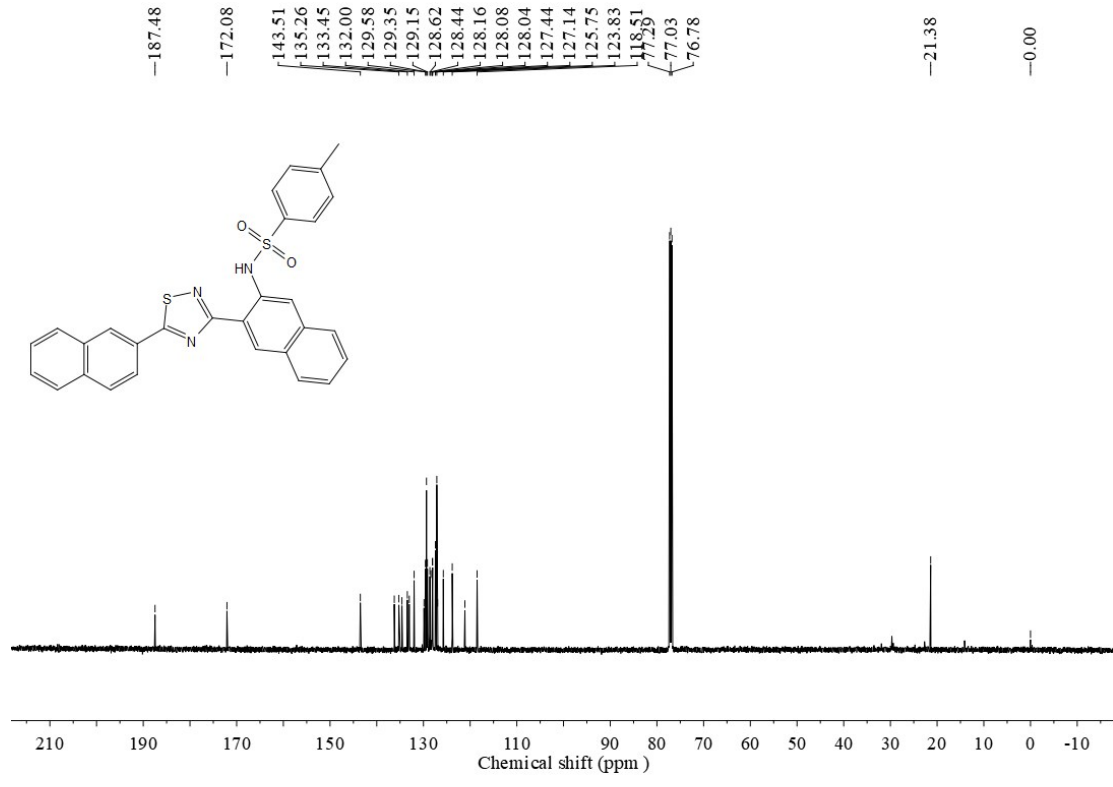

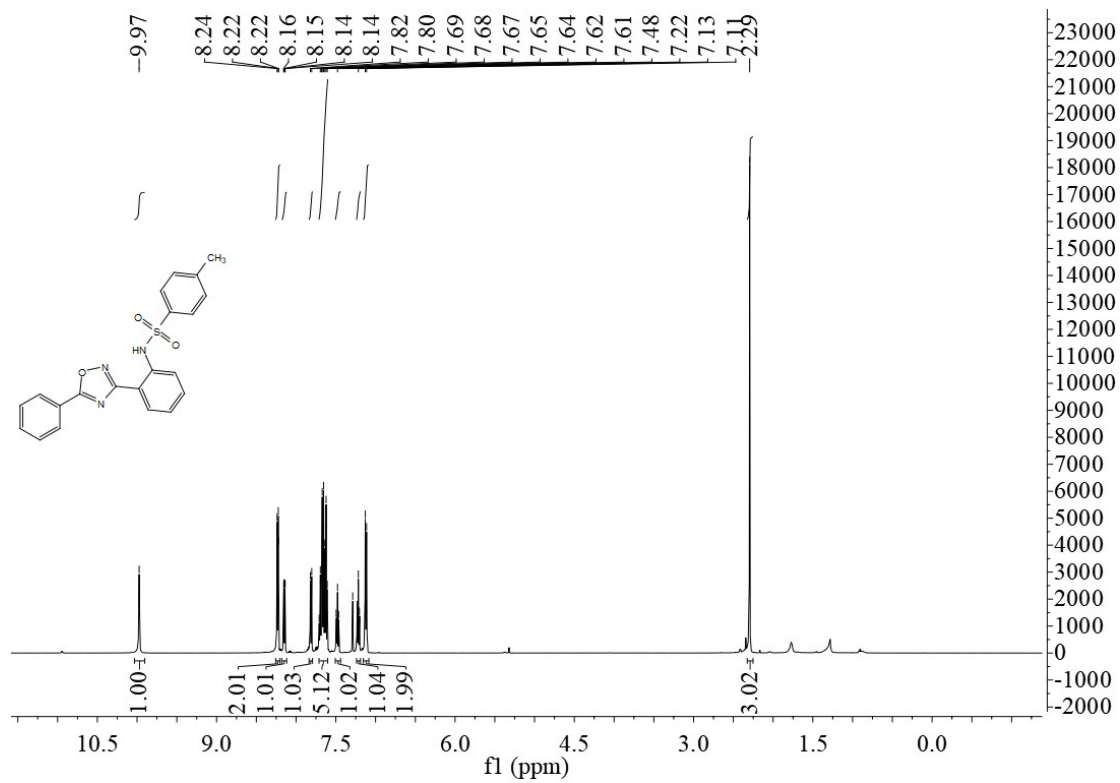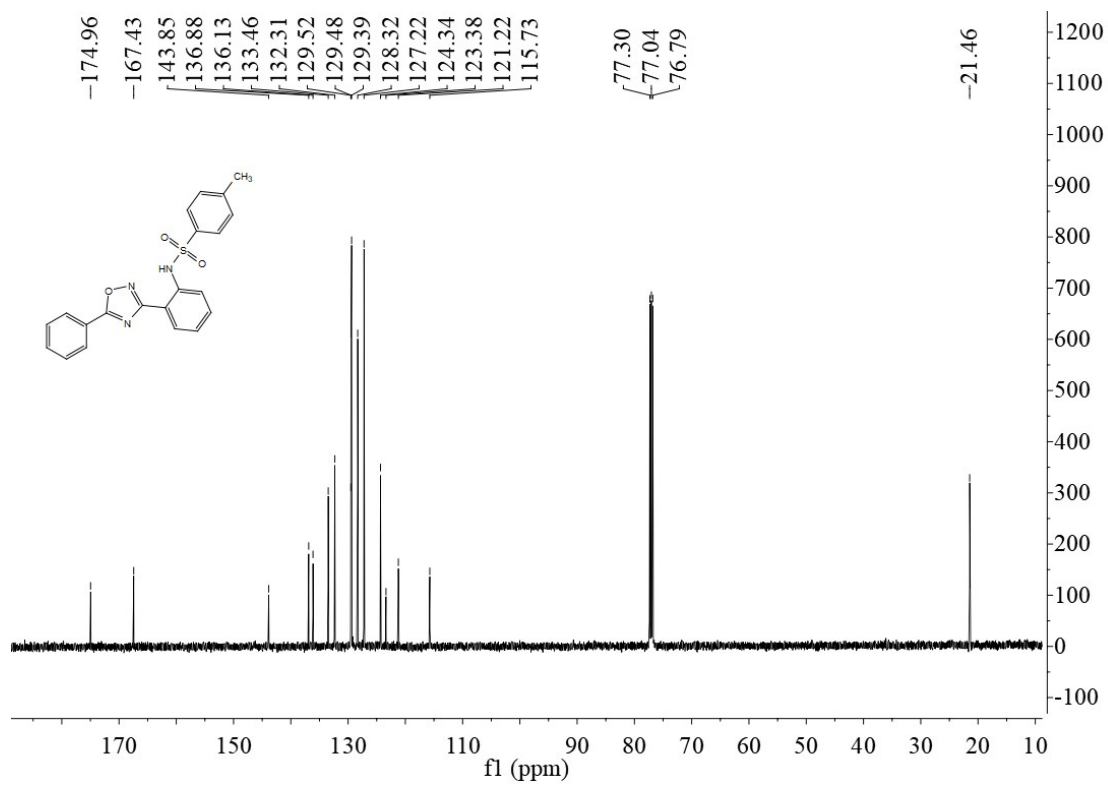

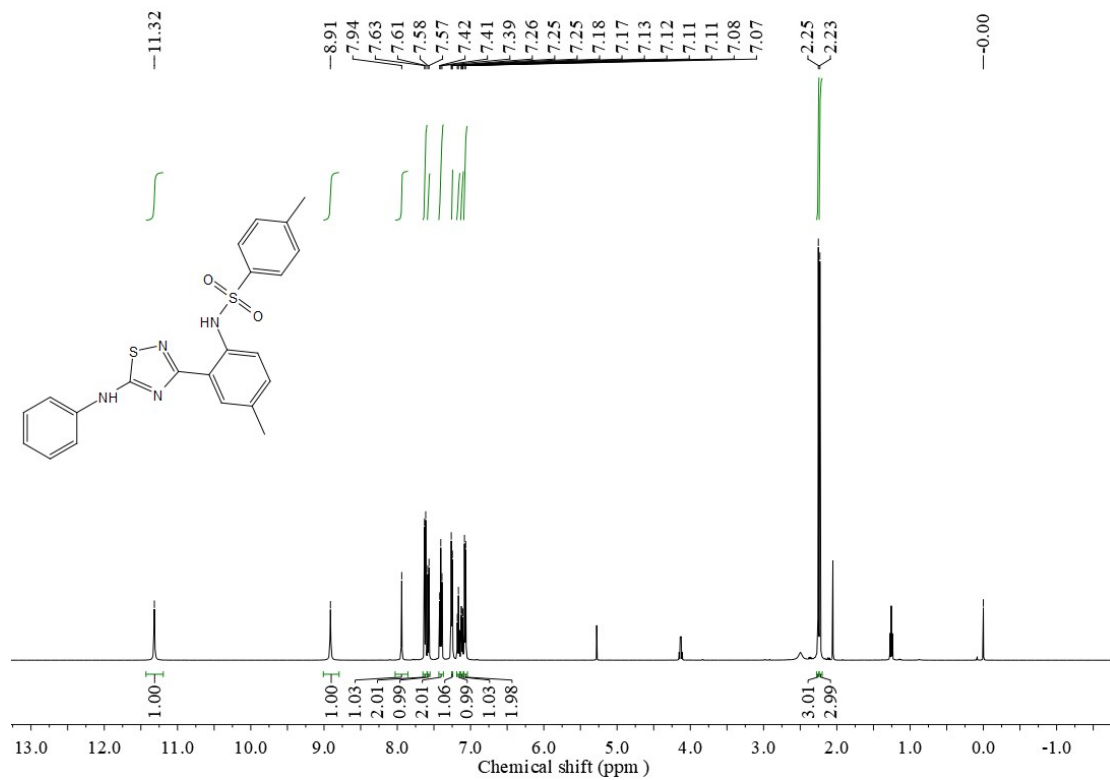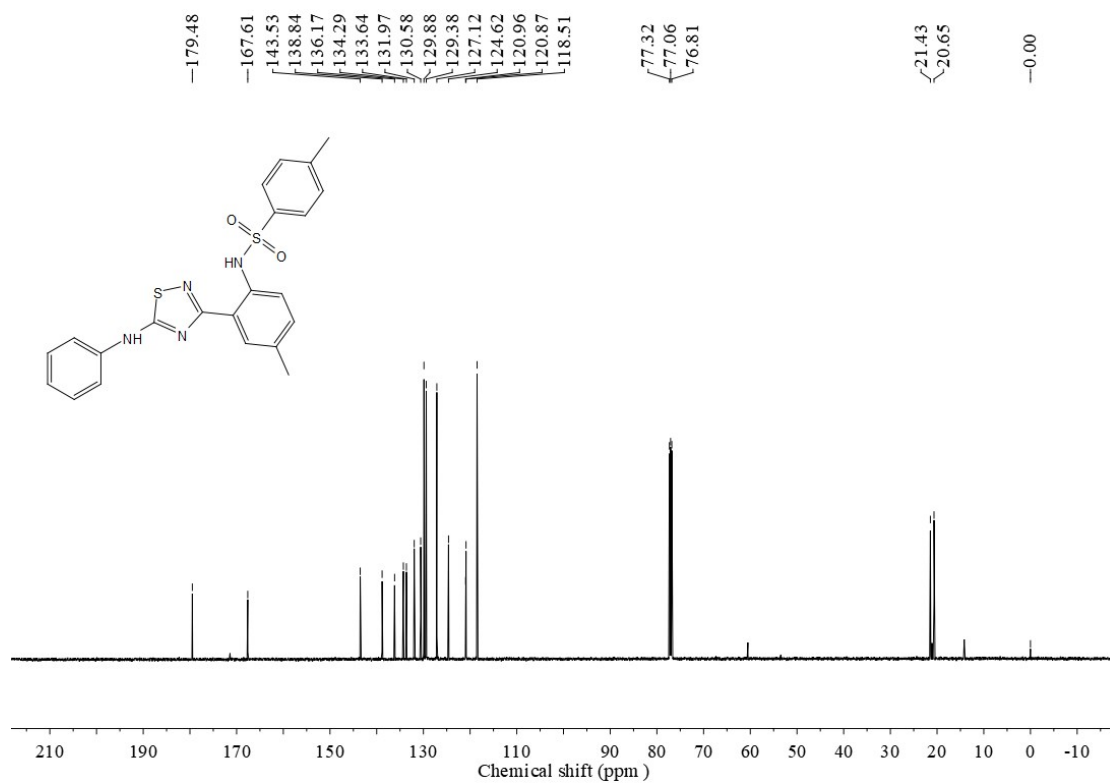

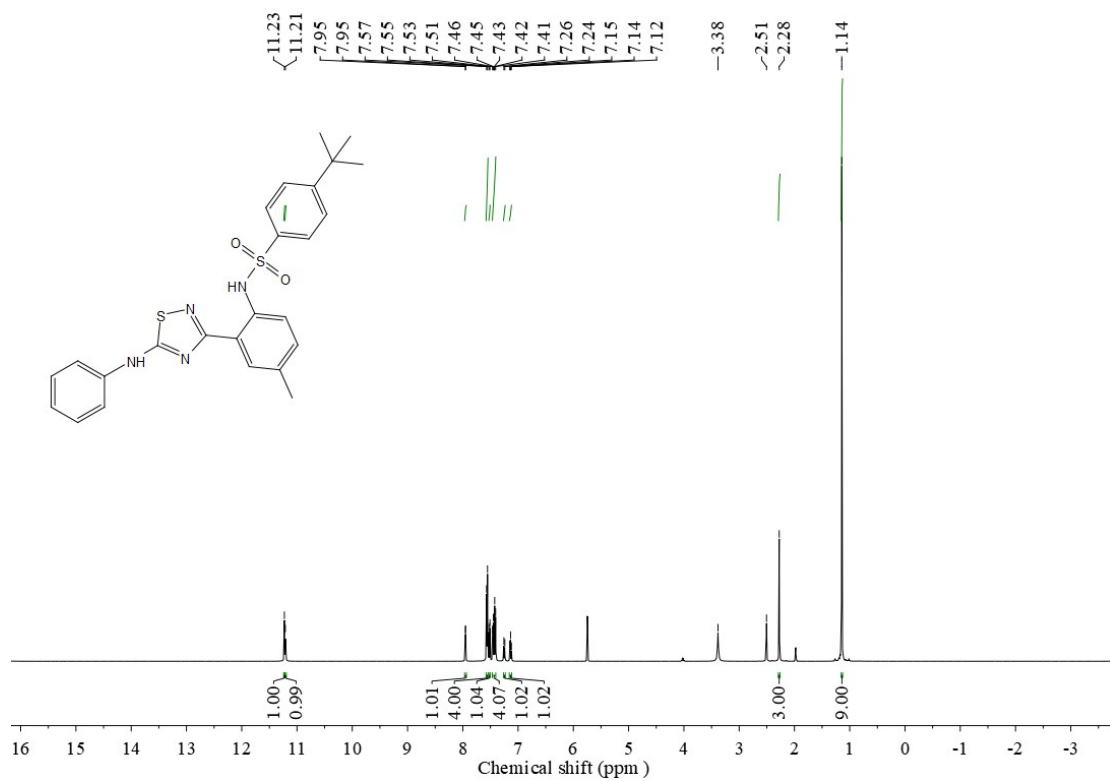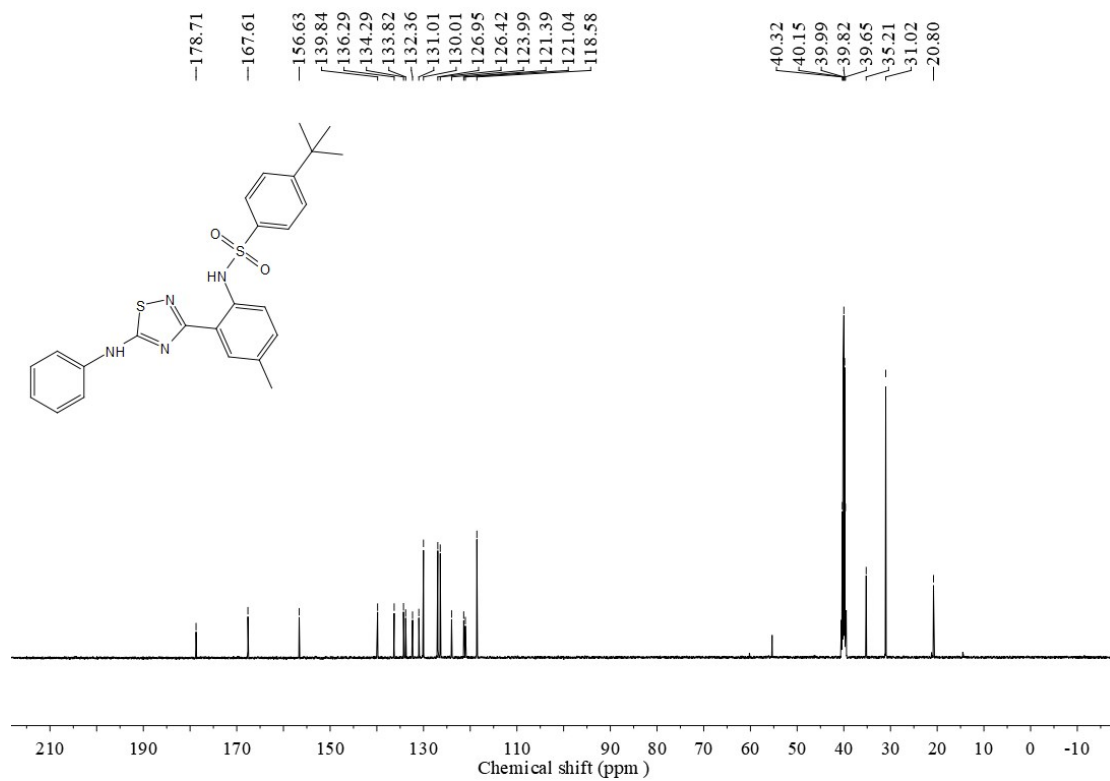

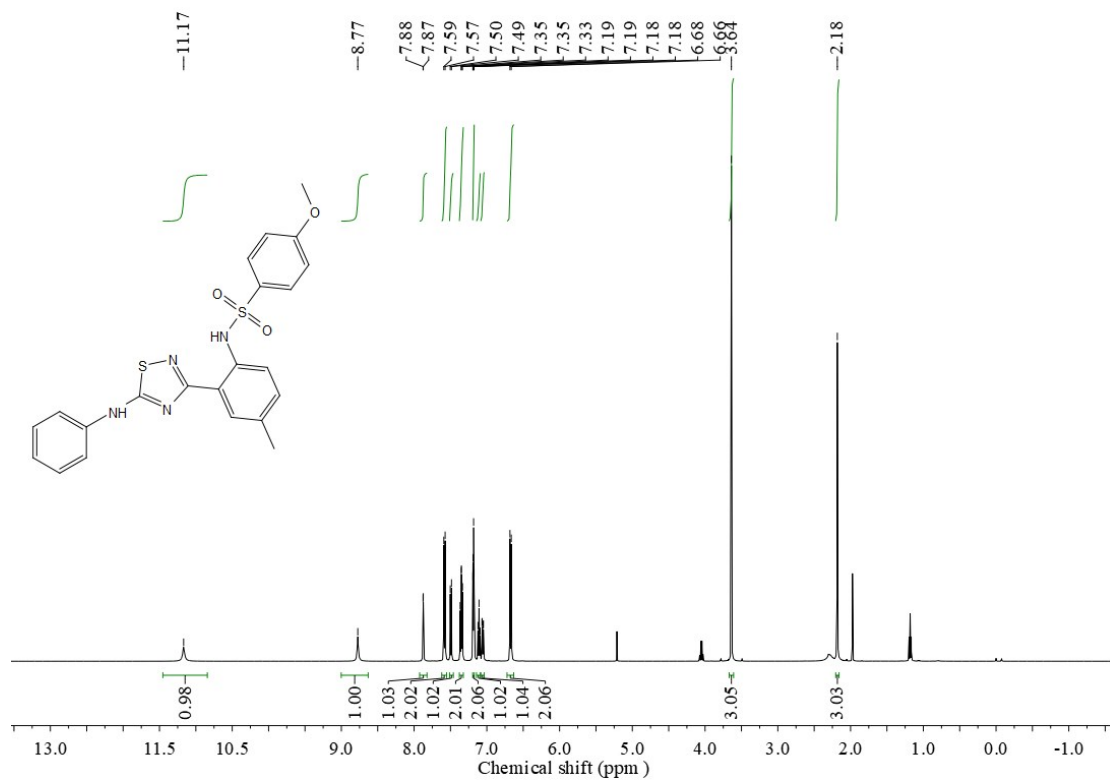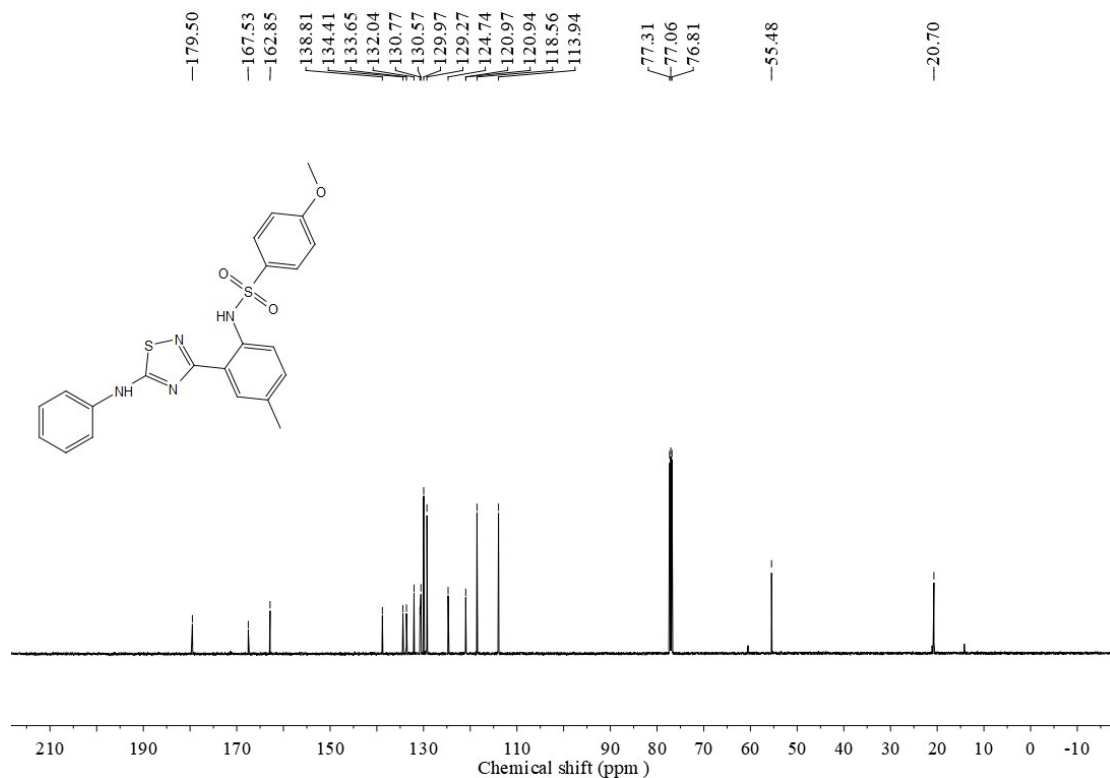

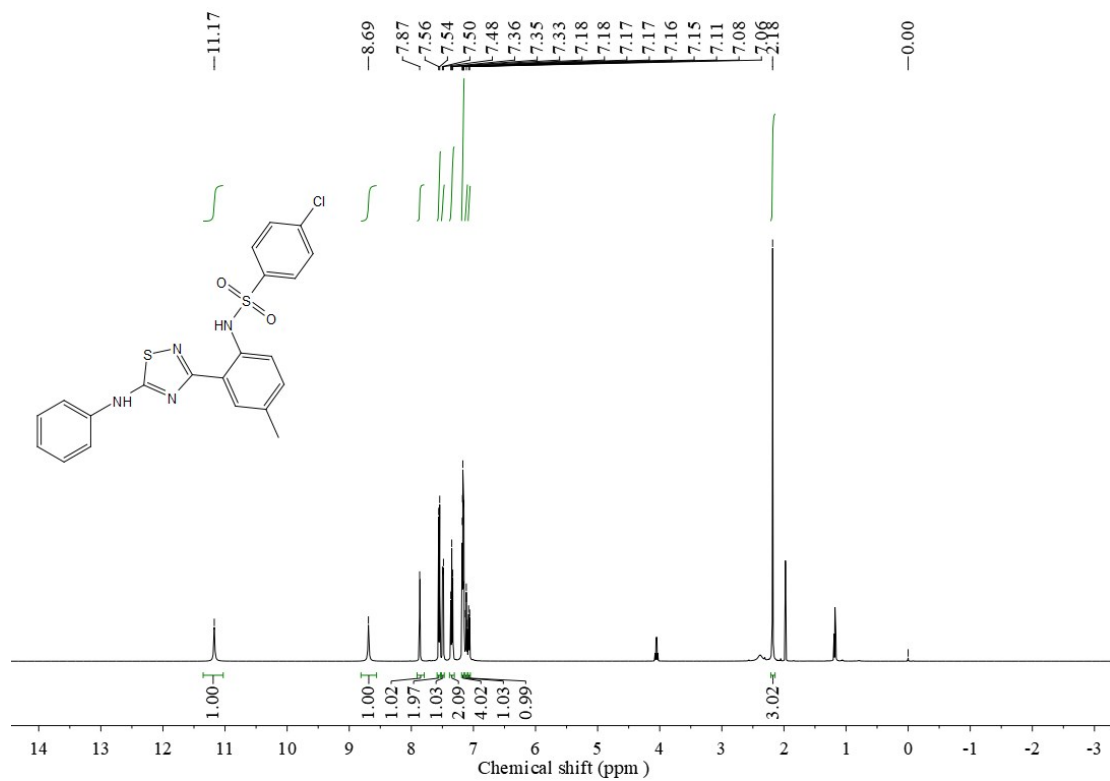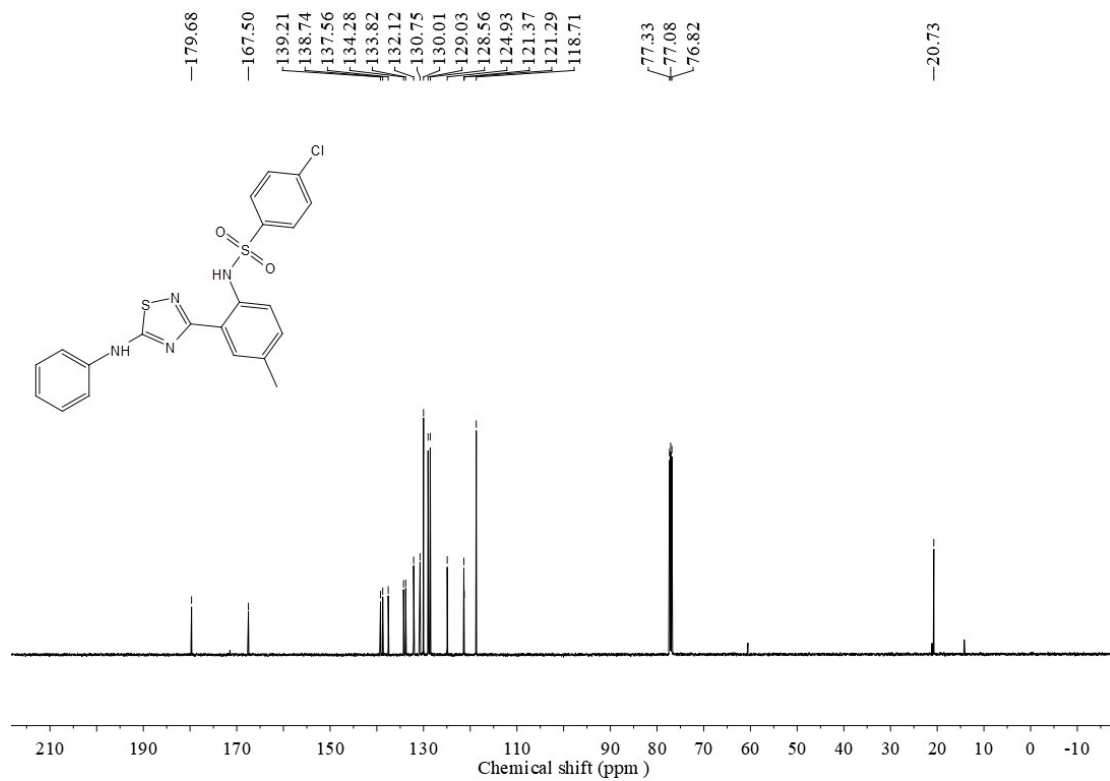



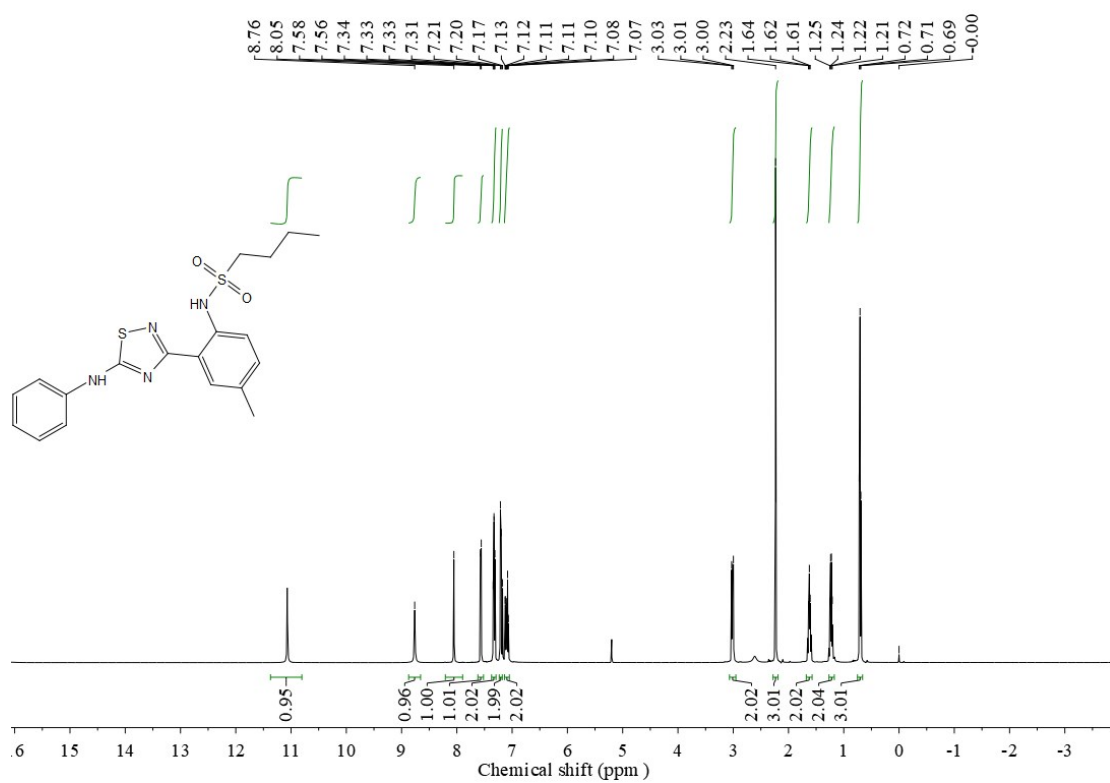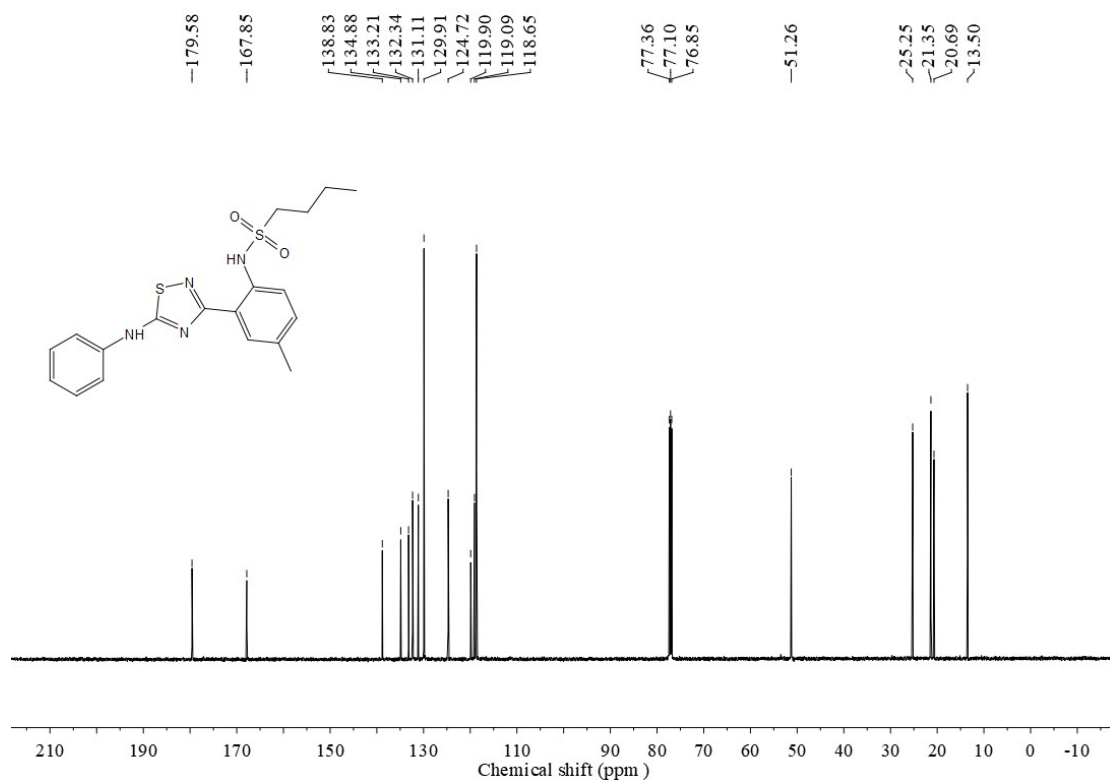

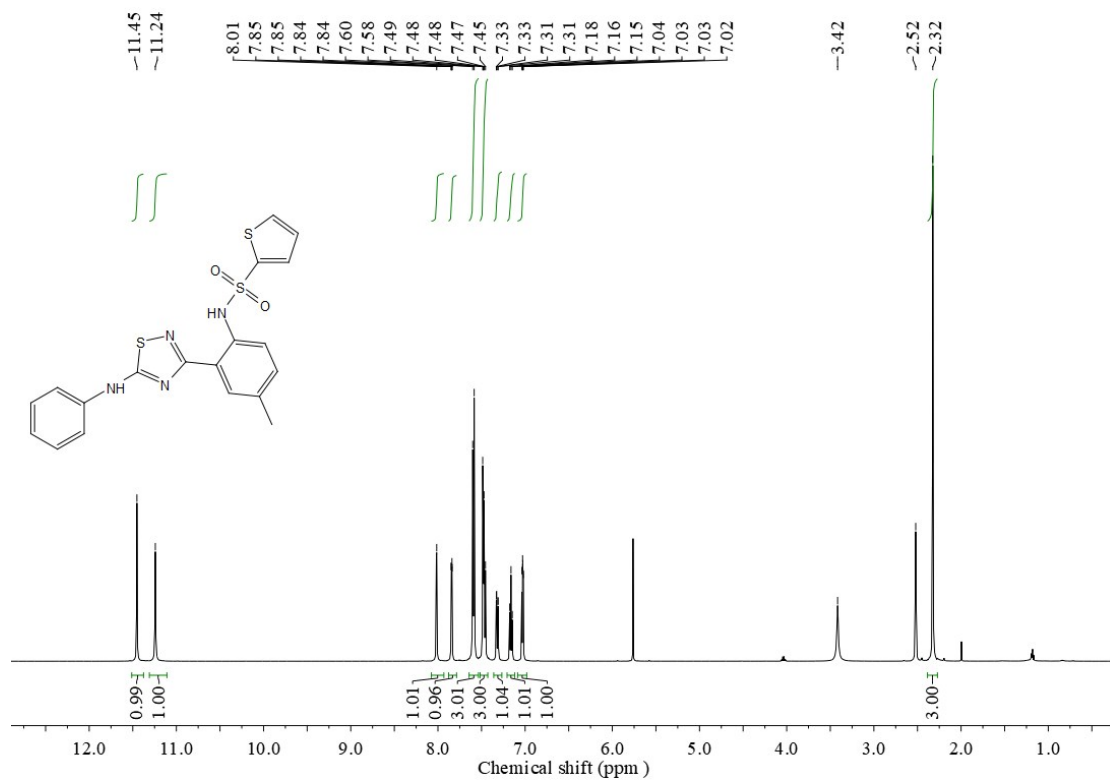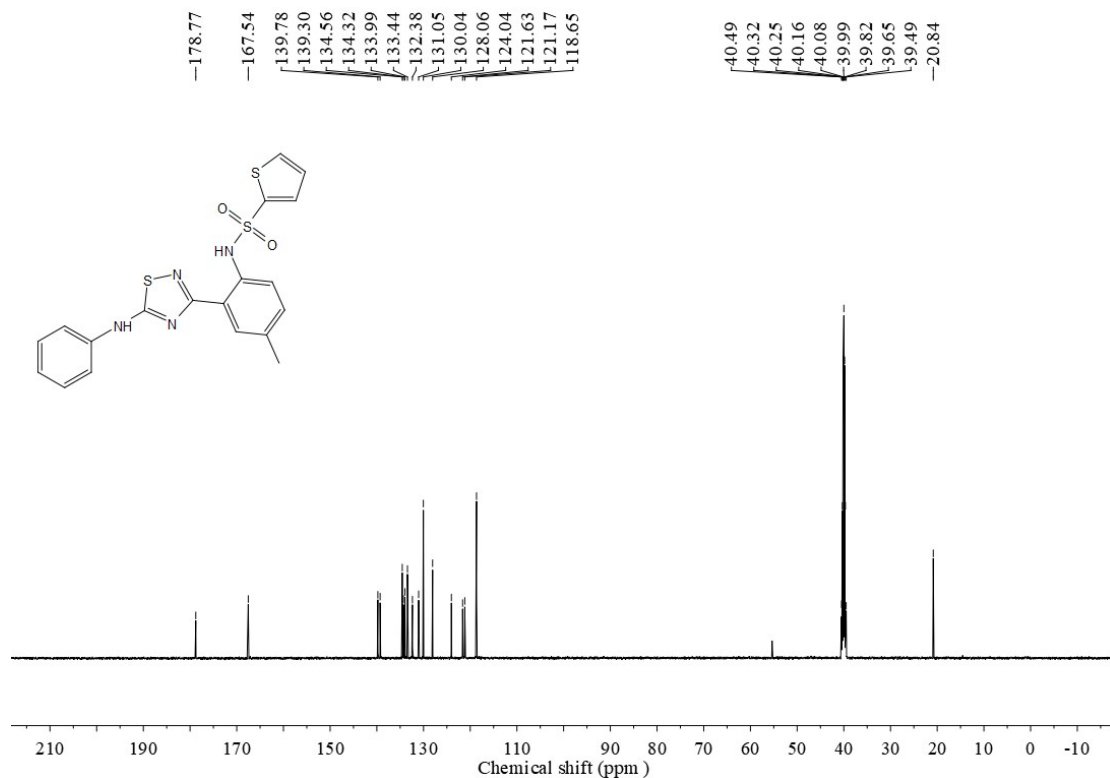

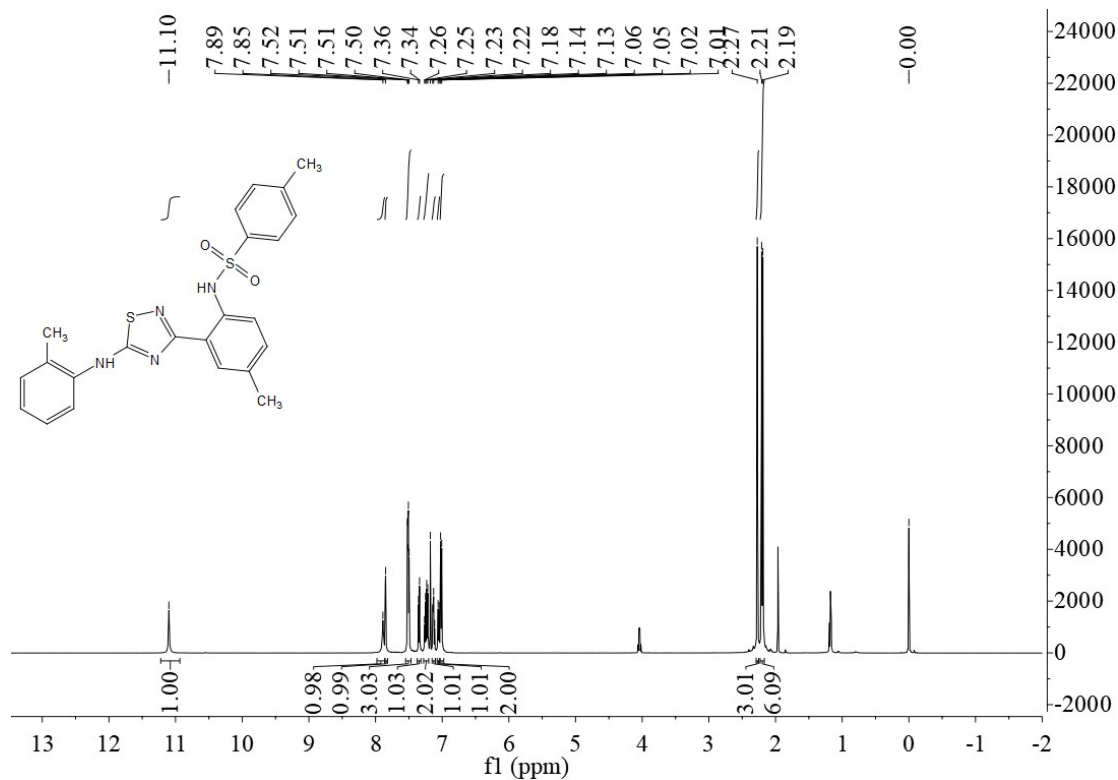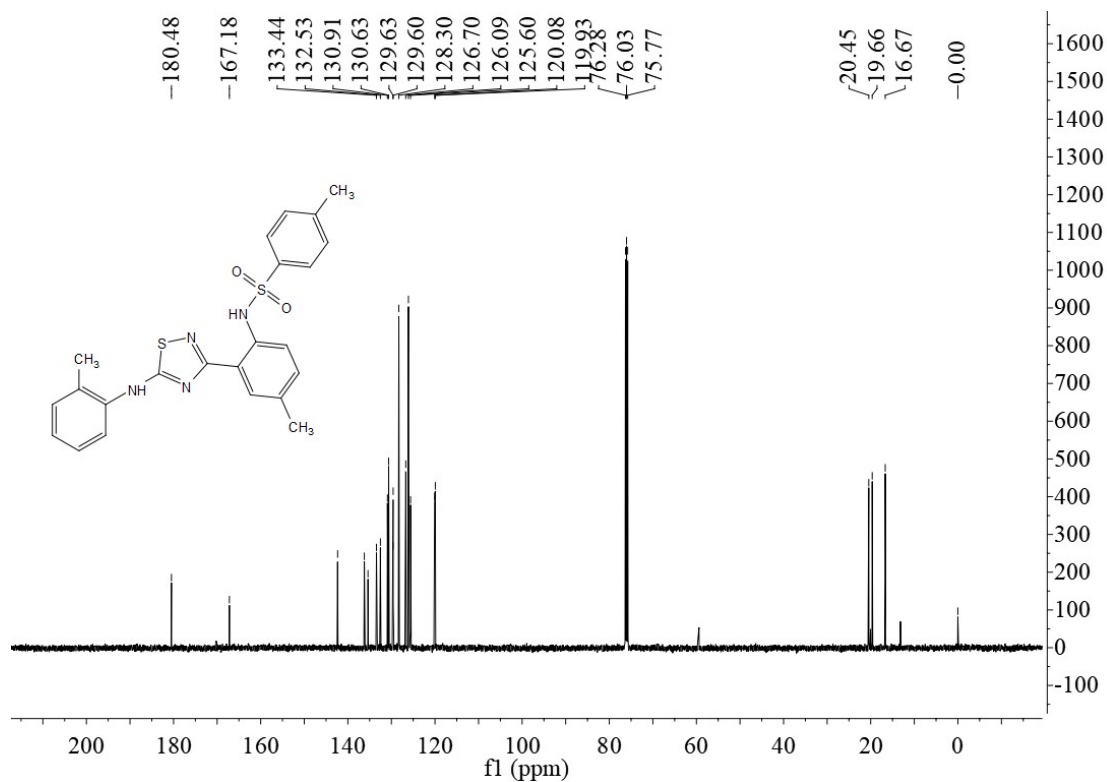

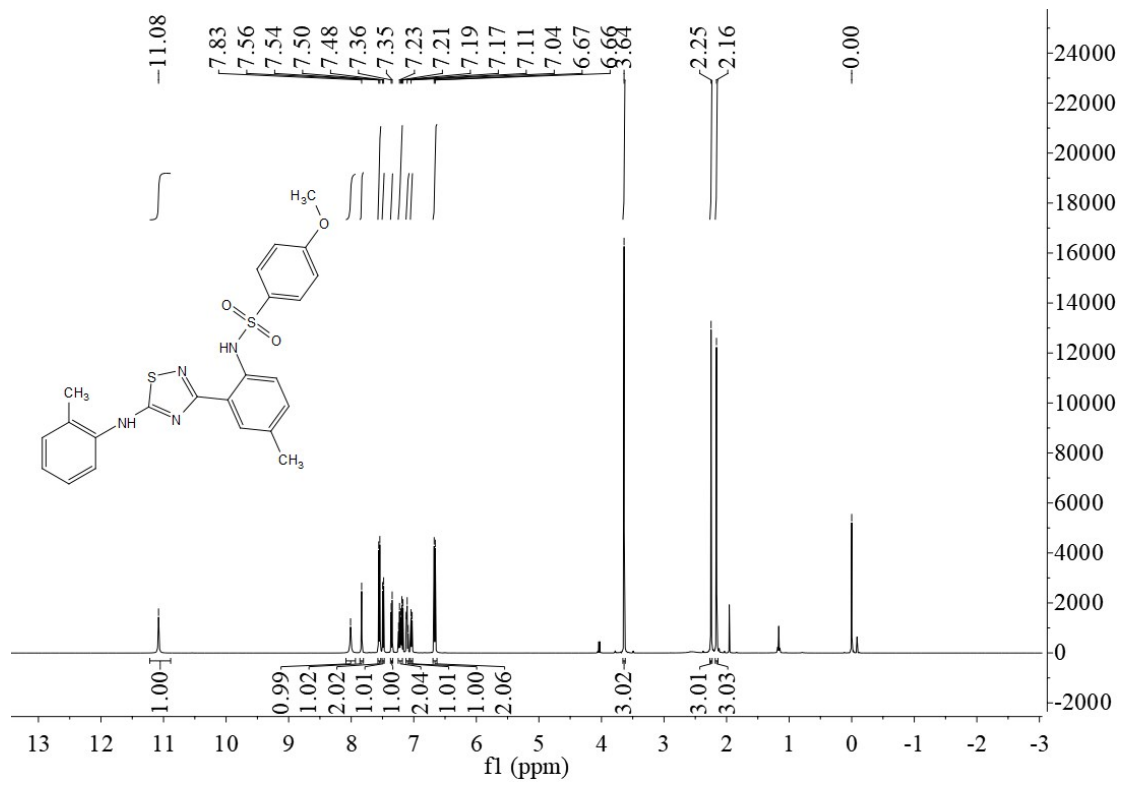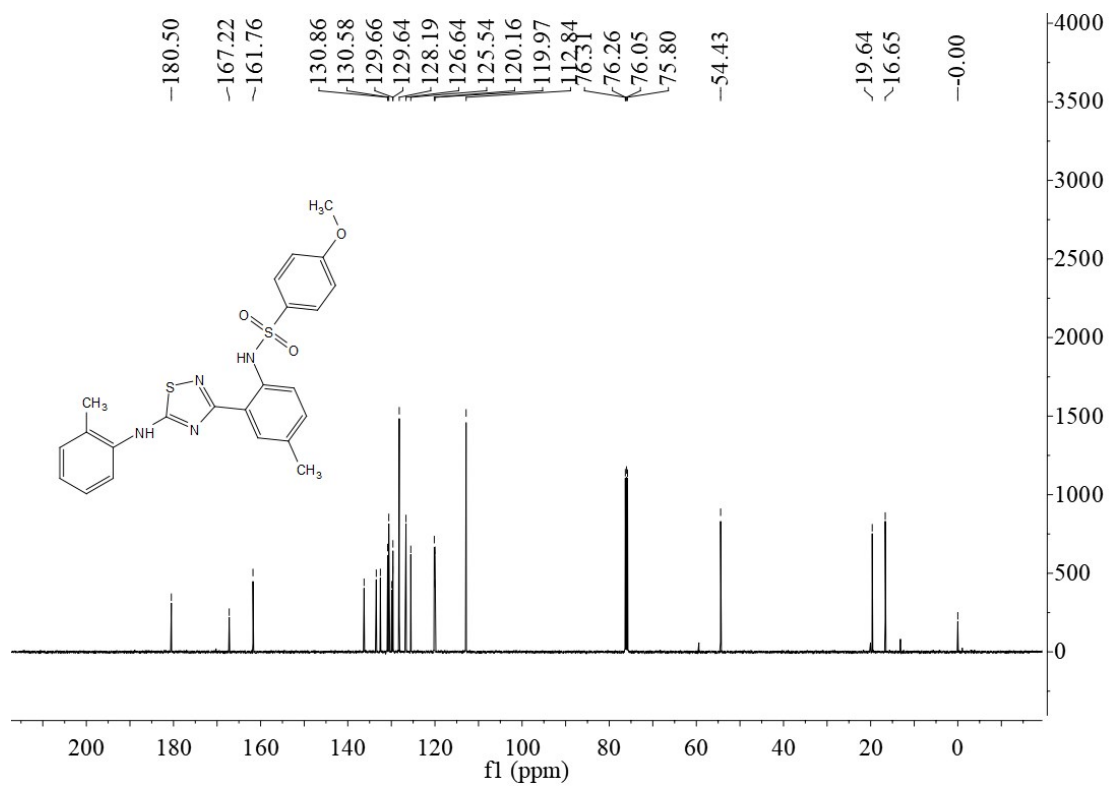

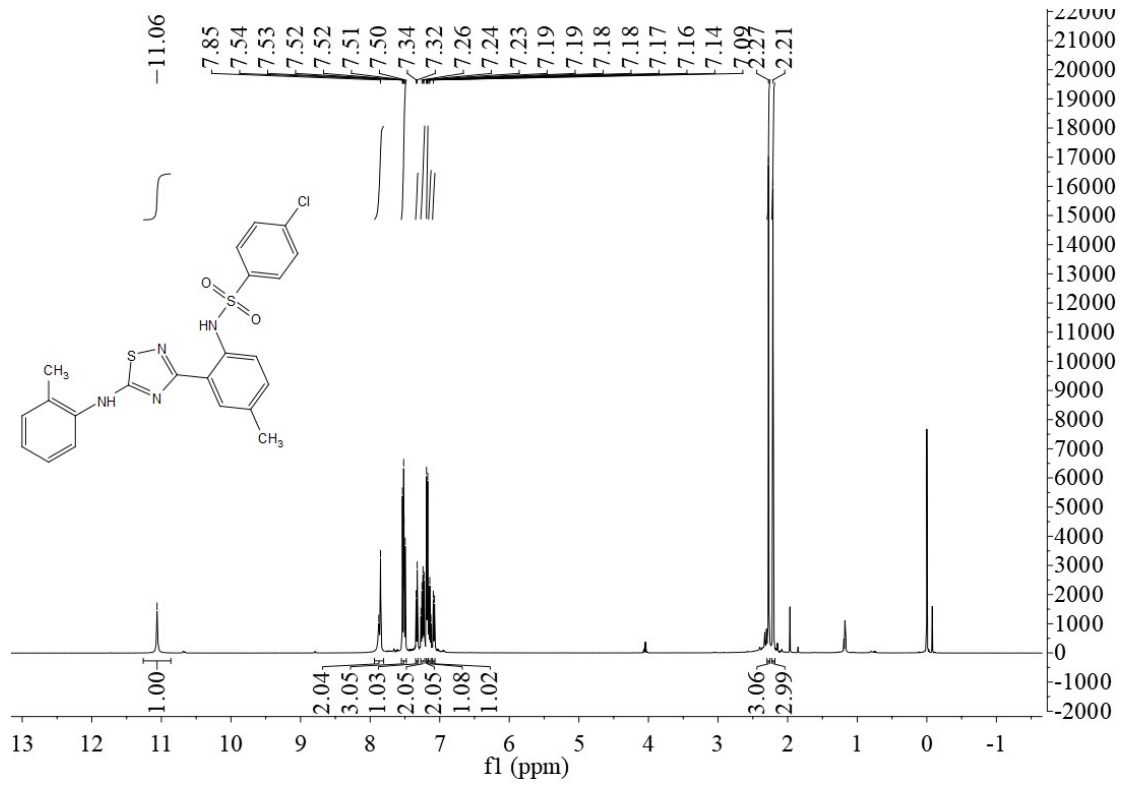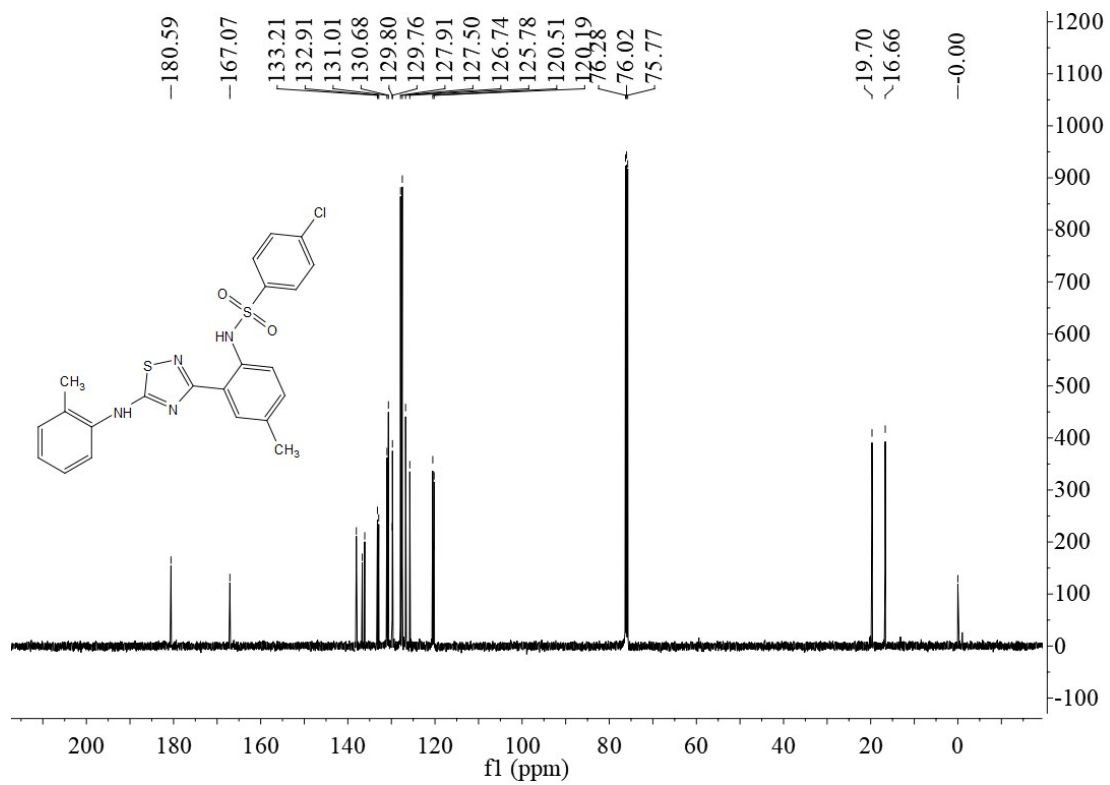

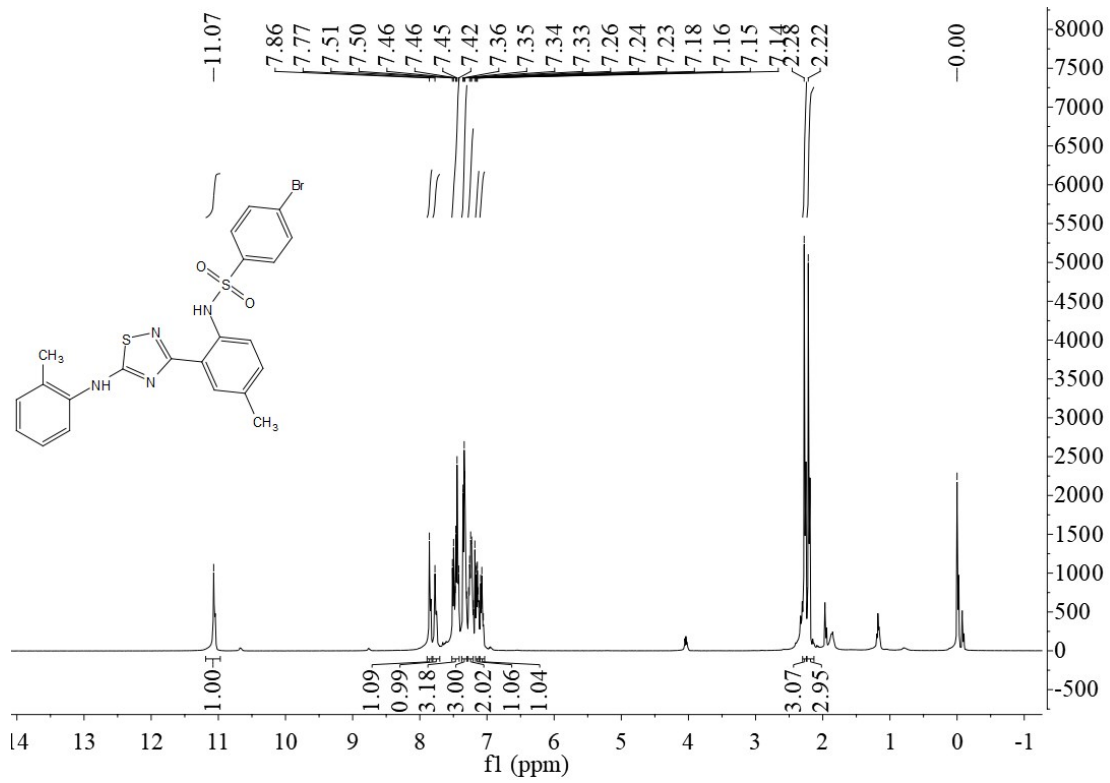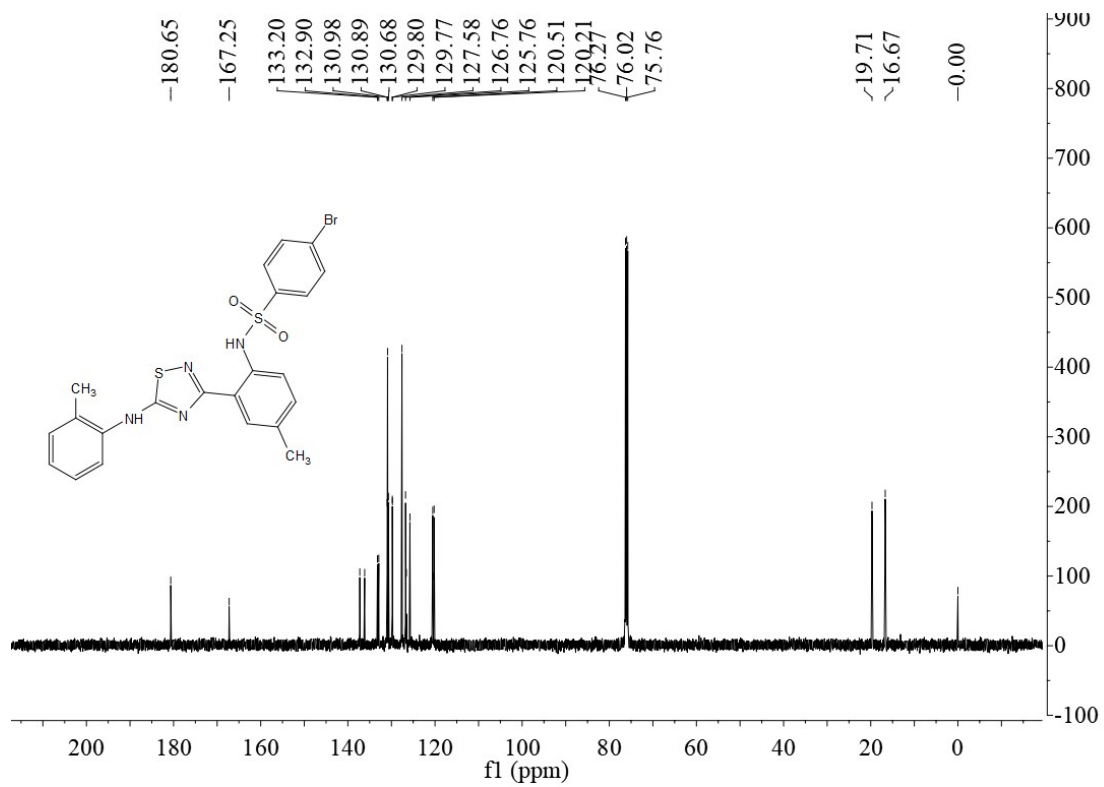

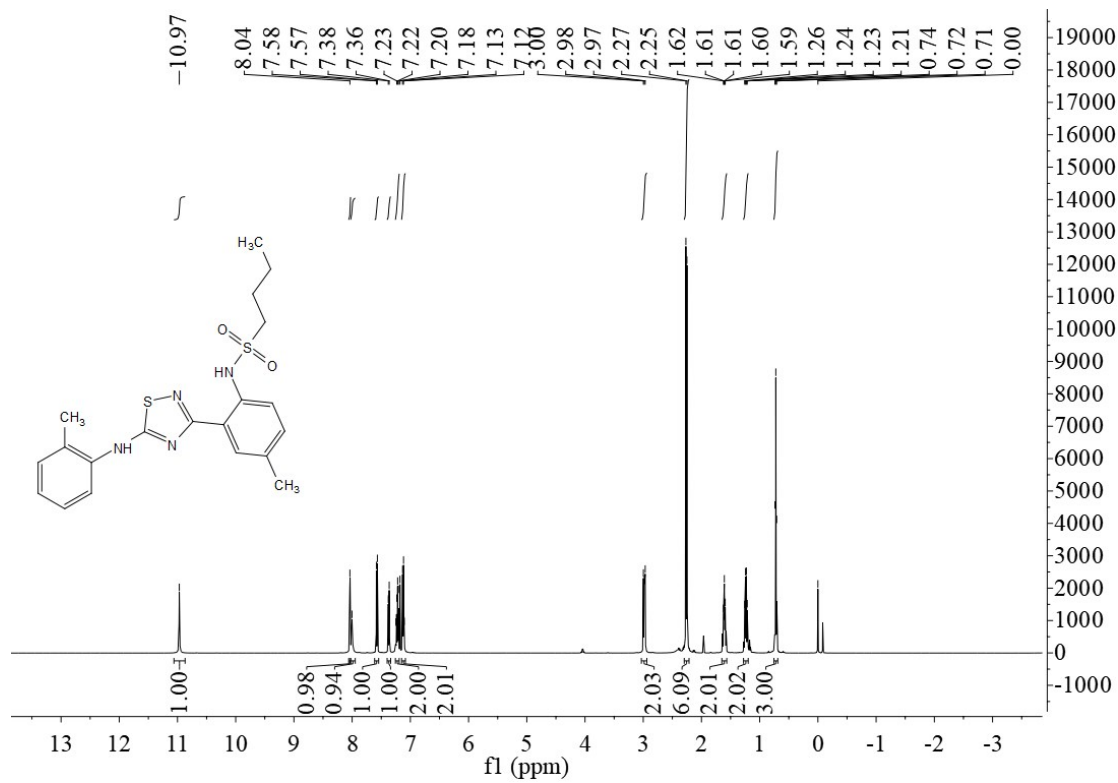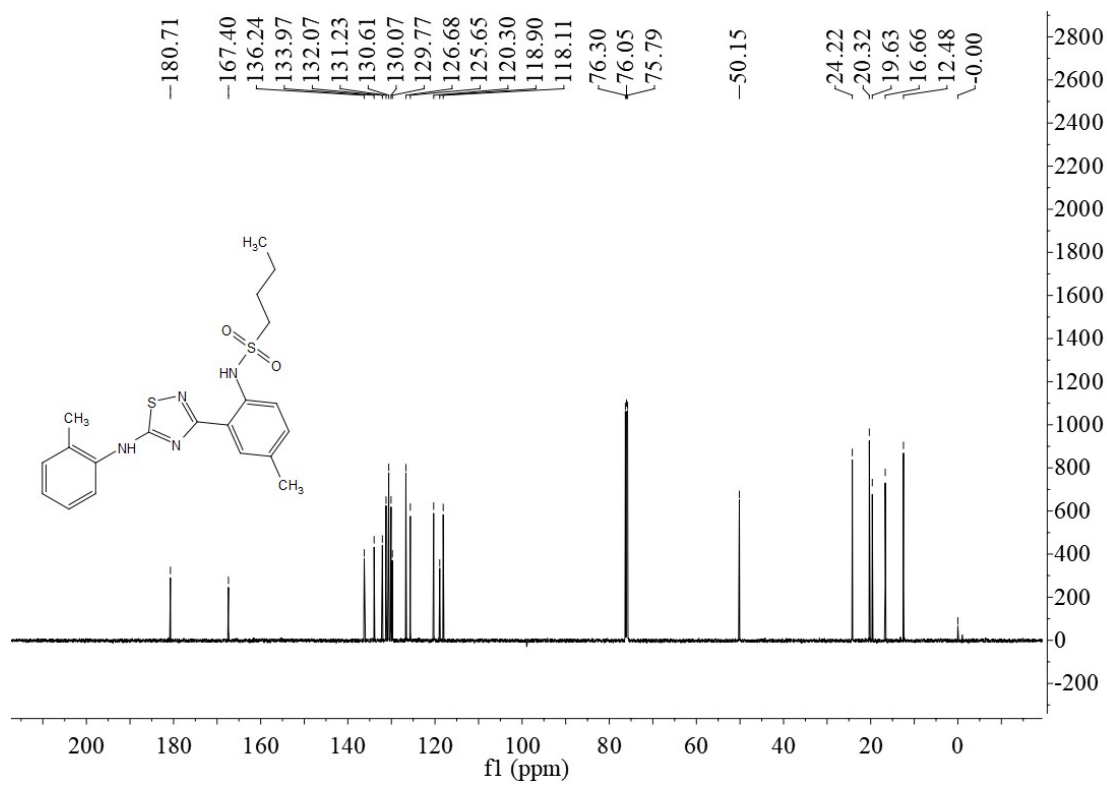

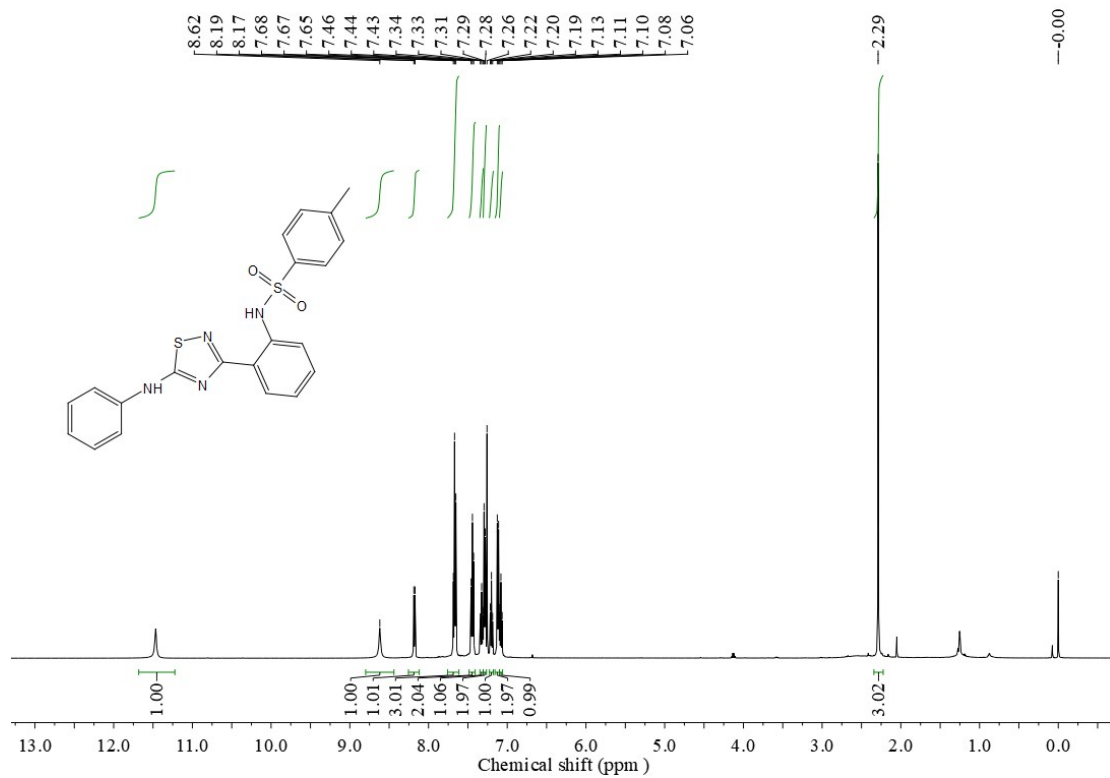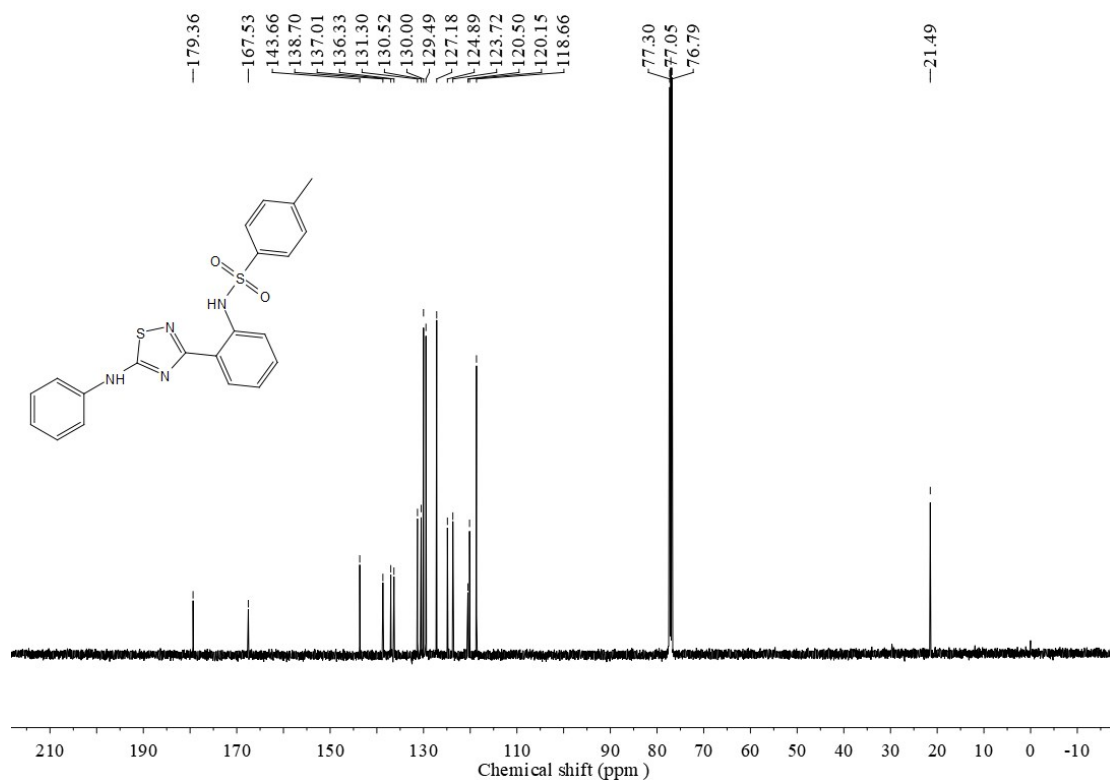



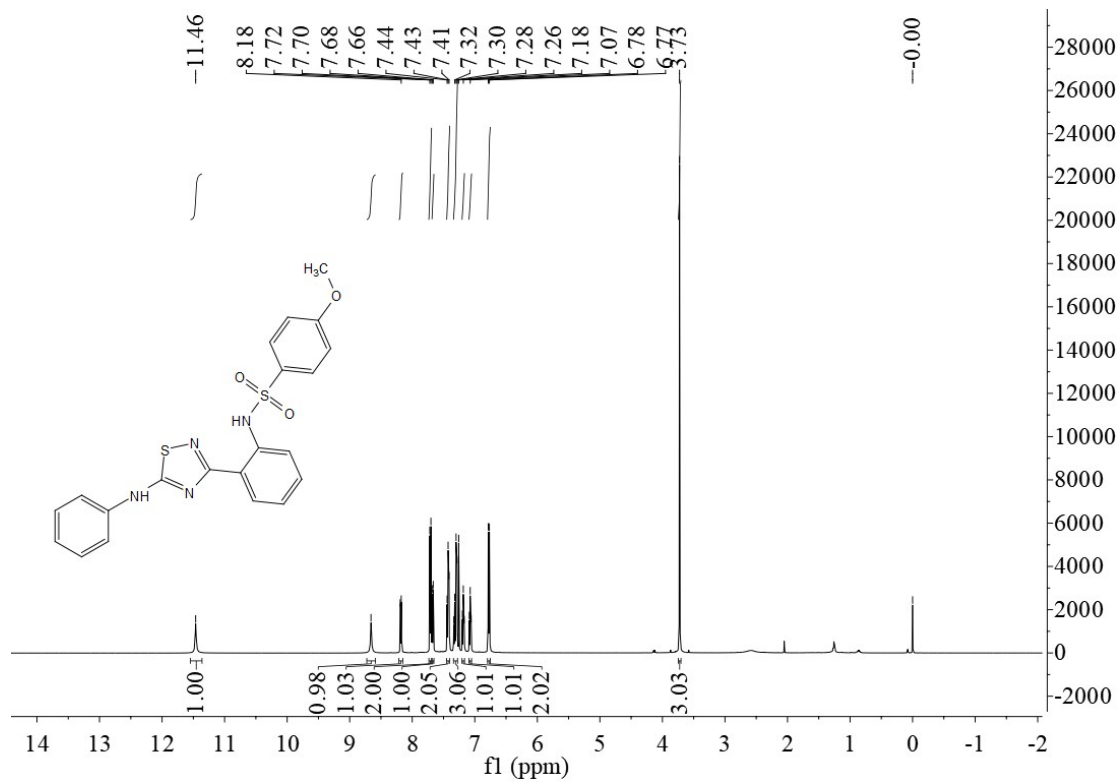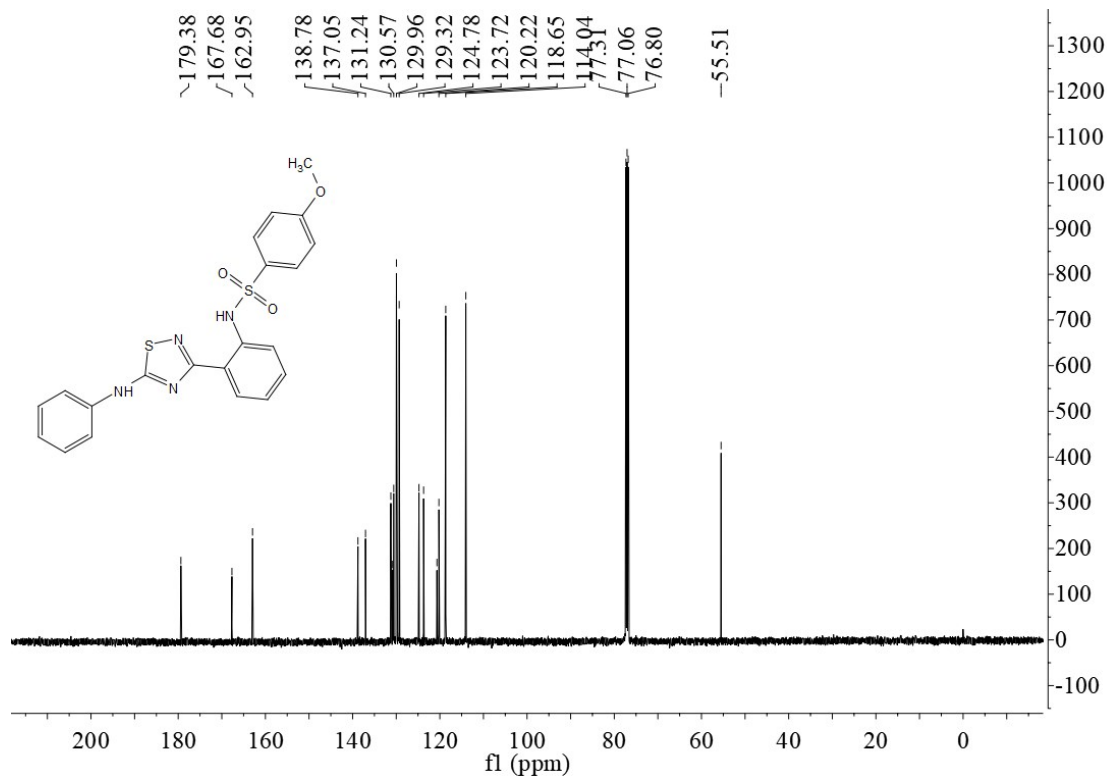

Supplement: d1ra04450h1.pdf [file d1ra04450h1.pdf]
